1  
2 **Cavin1 intrinsically disordered domains are essential for fuzzy electrostatic**  
3 **interactions and caveola formation**

4  
5  
6  
7 Vikas A. Tillu<sup>1</sup>, James Rae<sup>1,2</sup>, Ya Gao<sup>1</sup>, Nicholas Ariotti<sup>3,4</sup>, Matthias Floetenmeyer<sup>2</sup>, Oleksiy  
8 Kovtun<sup>1,5</sup>, Kerrie-Ann McMahon<sup>1</sup>, Natasha Chaudhary<sup>1,6</sup>, Robert G. Parton<sup>1,2\*</sup> and Brett M.  
9 Collins<sup>1\*</sup>

- 10  
11  
12  
13 1. The University of Queensland, Institute for Molecular Bioscience, St. Lucia, Queensland, 4072,  
14 Australia.  
15 2. Centre for Microscopy and Microanalysis, St. Lucia, Queensland, 4072, Australia.  
16 3. Electron Microscope Unit, The University of New South Wales, Kensington, New South Wales,  
17 Australia.  
18 4. Department of Pathology, School of Medical Sciences, The University of New South Wales  
19 Kensington, New South Wales, Australia.  
20 5. Current address: MRC Laboratory of Molecular Biology, Cambridge Biomedical Campus,  
21 Cambridge, UK.  
22 6. Current address: The Lunenfeld-Tanenbaum Research Institute, Mount Sinai Hospital, Toronto,  
23 Canada.

24  
25  
26 Running Title: Cavin1 disordered sequences in caveola formation

27  
28 \*Corresponding authors: Robert Parton, Ph: +61 (0)7 33462032, Email: [r.parton@imb.uq.edu.au](mailto:r.parton@imb.uq.edu.au)  
29 Brett Collins, +61 (0)7 33462043, Email: [b.collins@imb.uq.edu.au](mailto:b.collins@imb.uq.edu.au)

30  
31 Keywords – caveolae, Cavin, coiled-coil, intrinsically disordered protein, MURC, phase separation,  
32 PTRF, SDPR, SRBC, undecad repeat  
33  
34

35 **Summary (150 words)**

36 Caveolae are spherically shaped nanodomains of the plasma membrane, generated by cooperative  
37 assembly of caveolin and cavin proteins. Cavins are cytosolic peripheral membrane proteins with  
38 negatively charged intrinsically disordered regions (DR1-3) that flank positively charged  $\alpha$ -helical  
39 regions (HR1 and HR2). Here we show that the three DR domains of Cavin1 are essential for caveola  
40 formation and dynamic trafficking of caveolae. Electrostatic interactions between DR and HR regions  
41 promote liquid-liquid phase separation behaviour of Cavin1 *in vitro*, assembly of Cavin1 oligomers  
42 in solution, generation of membrane curvature, association with caveolin-1 (CAV1), and Cavin1  
43 recruitment to caveolae in cells. Removal of the first disordered region causes irreversible gel  
44 formation *in vitro* and results in aberrant caveola trafficking through the endosomal system. We  
45 propose a model for caveola assembly whereby fuzzy electrostatic interactions between Cavin1 and  
46 CAV1 proteins, combined with membrane lipid interactions, are required to generate membrane  
47 curvature and a metastable caveola coat.

48

49

50

51

## 52 **Introduction**

53 Caveolae (*'little caves'*) are membrane invaginations with a diameter of 50-60 nm that are abundant  
54 in the plasma membrane of many cell types such as muscle fibres, endothelial cells and adipocytes.  
55 These membrane nanodomains are important for an array of different functions including  
56 endocytosis, intracellular signalling, lipid and fatty acid homeostasis and response to membrane stress  
57 <sup>1-3</sup>.

58 Although the precise details of caveola biogenesis remain enigmatic their assembly requires  
59 the activities of two families of proteins - caveolins and cavins - and their coordinated interactions  
60 with membrane lipids and cholesterol. The integral membrane proteins of the caveolin family (CAV1,  
61 CAV2 and muscle specific CAV3) are synthesized at the endoplasmic reticulum and trafficked via  
62 the Golgi apparatus to the plasma membrane <sup>4</sup>. Caveolins have an unusual hairpin structure that  
63 inserts into the membrane bilayer, with an extended N-terminal domain and  $\alpha$ -helical C-terminal  
64 domain exposed to the cytoplasm <sup>3, 5, 6</sup>. When expressed on its own in mammalian cells the core  
65 caveolin CAV1 is diffusely localised in the plasma membrane and is unable to form spherical  
66 caveolae in the absence of cavins <sup>4,7</sup>. In contrast, CAV1 is able to generate membrane vesicles similar  
67 to caveolae (h-caveolae) upon heterologous expression in *Escherichia coli* <sup>8</sup>. This points to an  
68 intrinsic capacity of CAV1 to generate membrane curvature, which is thought to be enabled by the  
69 specific lipid composition of *E. coli* membranes. In metazoan cells however, the additional presence  
70 of the peripheral membrane cavin proteins is required for the formation of native caveolae. In  
71 particular, Cavin1 and CAV1 are together required and sufficient to generate a minimal core system  
72 for caveola formation at the plasma membrane. Other cavin family members require Cavin1 for their  
73 recruitment and are thought to provide regulatory or tissue-specific activities <sup>7, 9, 10</sup>.

74 All cavin proteins share a highly characteristic domain architecture consisting of two core  $\alpha$ -  
75 helical regions (HR1 and HR2) with relatively high sequence conservation <sup>11, 12</sup>. These are connected  
76 by three intrinsically disordered regions (DR1, DR2 and DR3), that possess very little sequence  
77 homology but share the property of being enriched in negatively charged residues (**Fig. 1A**). Cavin  
78 proteins can assemble into homo- and hetero-oligomeric complexes that form a protein coat on the  
79 cytosolic face of caveolae; and the essential isoform Cavin1 can form homo-oligomers that drive  
80 caveola formation in the absence of other family members <sup>11, 13, 14</sup>. The N-terminal  $\alpha$ -helical HR1  
81 domain of Cavin1 forms a core trimeric coiled-coil structure that also promotes heteromeric  
82 interactions between other members of the Cavin family <sup>11</sup>. A surface exposed patch of basic amino  
83 acid residues in the HR1 domain has affinity for phosphoinositide lipid headgroups including  
84 phosphatidylinositol-4,5-bisphosphate (PI(4,5)P<sub>2</sub>) <sup>11</sup>. The C-terminal  $\alpha$ -helical HR2 region of Cavin1  
85 is unique in the cavin family as it also contains a stretch of repeated undecad sequences (11-mers)  
86 predicted to form a second coiled-coil structure termed UC1 (undecad of Cavin1) <sup>10</sup>. Basic amino

87 acids within the HR2 and UC1 domains can associate with phosphatidylserine (PS) to regulate  
88 caveola formation and stability <sup>10</sup>. These two  $\alpha$ -helical lipid interacting sites are important for  
89 membrane recruitment and for generating caveolar membrane curvature. However, the molecular  
90 mechanisms of caveolar membrane association and higher-order assembly of cavins with caveolins  
91 at the cell surface are largely unknown.

92 In this study we examined the role of the uncharacterised DR domains of Cavin1 in caveola  
93 formation. The DR domains of Cavin1 are strictly required for caveola assembly, and a systematic  
94 dissection of these intrinsically disordered regions showed that there are minimal acidic sequences  
95 within the DR domains that are essential for caveolar targeting, *in vitro* membrane remodelling and  
96 homo-oligomeric Cavin1 complex assembly. We find that Cavin1 undergoes electrostatically driven  
97 self-association via its disordered regions that promotes liquid-liquid phase separation (LLPS) *in*  
98 *vitro*, that it can co-phase separate with CAV1, and this is dependent on specific sequence properties  
99 of the two proteins. Perturbing the DR domain-mediated dynamics of Cavin1 self-association has  
100 profound effects on Cavin1 and CAV1 localisation and caveolar trafficking in cells. Our results lead  
101 us to propose a model for caveola assembly involving ‘fuzzy’ electrostatic interactions by Cavin1 at  
102 the CAV1/membrane interface to generate a metastable caveola coat.

103

104

## 105 **Results**

### 106 **Cavin1 forms electrostatically driven oligomers that depend on DR1 and DR3 domains**

107 The cavin family proteins all share distinguishing structural similarities with each other, consisting  
108 of disordered N- and C-terminal domains DR1 and DR3, a central disordered region DR2, and  
109 interspersed  $\alpha$ -helical coiled-coil region HR1 and predicted  $\alpha$ -helical region HR2 (**Fig. 1A**). The  
110 trimeric coiled-coil HR1 domain and C-terminal HR2 domains are both rich in basic amino acid  
111 residues, while the three DR domains instead possess a high proportion of acidic amino acid residues.  
112 This alternating electrostatic charge distribution is a distinctive and conserved feature of all family  
113 members (**Fig. S1A**), indicating it is an essential characteristic of the proteins. We also used the D2P2  
114 web server <sup>15</sup> to analyse the sequence of Cavin1 for predicted regions of disorder, and confirmed that  
115 the DR1, DR2 and DR3 regions are predicted to be intrinsically disordered as suggested by previous  
116 secondary structure analyses <sup>10, 11</sup> (**Fig. S1B**). Interestingly, sites of phosphorylation in Cavin1 are  
117 predominantly found in the DR1, DR2 and DR3 domains, while sites of ubiquitylation are  
118 concentrated in the HR1 and HR2 regions. In subsequent experiments the boundaries of the mouse  
119 Cavin1 domains are defined as: DR1 (1-44), HR1 (45-155), DR2 (156-209), HR2 (210-310), and  
120 DR3 (311-392) (**Fig. 1A**). Expression constructs used in this study are outlined in **Fig. S2**.

121 We recently proposed that the predominantly negatively charged DR sequences of Cavin1  
122 may associate with the positively charged HR domains to promote intra and/or inter molecular  
123 electrostatic interactions required for coat assembly <sup>12</sup>. To probe the role of electrostatic interactions,  
124 we used fluorescence correlation spectroscopy (FCS) to measure the diffusional properties of purified  
125 GFP-tagged Cavin1 in both 500 mM NaCl (high salt) and 150 mM NaCl (iso-osmotic salt  
126 concentration). According to polymer theory, the diffusivity of protein molecules in solution  
127 decreases with increasing intermolecular interactions due to molecular crowding limiting its  
128 molecular motion <sup>16</sup>. GFP-Cavin1 (100 nM concentration) showed a remarkable decrease in its  
129 diffusivity with the reduction of ionic strength from 500 mM NaCl ( $12.01 \pm 3.03 \mu\text{m}^2/\text{sec}$ ) to 150  
130 mM NaCl ( $4.02 \pm 0.50 \mu\text{m}^2/\text{sec}$ ) (**Fig. 1B**). This indicates that at physiological salt concentrations  
131 Cavin1 can form homomeric oligomers with an average hydrodynamic radius  $\sim 55$  nm, similar to  
132 those observed previously <sup>4, 14</sup>, and that this self-association is dependent on electrostatic interactions.  
133 In contrast to full-length Cavin1, removal of either N- or C-terminal DR1 or DR3 domains prevents  
134 this electrostatically driven self-assembly at lower physiological salt concentrations (**Fig. 1B**).

135 Next, we sought to understand the role of DR sequences in oligomeric assembly of Cavin1 in  
136 a more representative cellular milieu. For these experiments we used MCF7 cells, which lack  
137 caveolae and do not express any caveolin or cavin proteins <sup>14, 17, 18</sup>. GFP-tagged Cavin1 proteins were  
138 transiently expressed and FCS analysis was used to measure the diffusivity of each protein in cell  
139 lysates (all at 150 mM NaCl). Full length GFP-Cavin1 in MCF7 cell lysates forms relatively

140 heterogenous large molecular weight species in solution with slow diffusive properties ( $6.35 \pm 2.35$   
141  $\mu\text{m}^2/\text{sec}$ ) (**Fig. 1C**) similar to purified recombinant GFP-Cavin1. In contrast to purified recombinant  
142 GFP-Cavin1- $\Delta\text{DR1}$ , the N-terminal DR1 deletion in cell lysates showed a similar (although tending  
143 to faster) rate of diffusion to the full-length protein ( $7.65 \pm 4.40 \mu\text{m}^2/\text{sec}$ ) (**Fig. 1C**). Complete  
144 deletion of the C-terminal DR3 region of GFP-Cavin1- $\Delta\text{DR3}$  however, significantly increased the  
145 diffusivity of Cavin1 in MCF7 lysates ( $18.54 \pm 6.22 \mu\text{m}^2/\text{sec}$ ), similar to the recombinant GFP-  
146 Cavin1- $\Delta\text{DR3}$  (**Fig. 1C**). Overall these studies demonstrate a role for the DR sequences in  
147 electrostatically driven oligomerisation of Cavin1 in solution.

148

### 149 **Cavin1 undergoes liquid-liquid phase separation (LLPS) influenced by the DR domains**

150 There is an increasing awareness of the role of intrinsically disordered sequences in generating  
151 membraneless organelles via liquid-liquid phase separation (LLPS) or ‘demixing’ of proteins and  
152 associated molecules in solution. Demixing or LLPS can be driven by a variety of mechanisms,  
153 including cation- $\pi$  and  $\pi$ - $\pi$  stacking, interactions with polyanions such as RNA, and intermolecular  
154 electrostatic interactions<sup>19-22</sup>. A number of recent studies have shown that membranes can be  
155 platforms for nucleating and transporting phase-separated assemblies, or in turn be regulated and  
156 organised via LLPS-mediated processes<sup>23-34</sup>. It has also been proposed that the formation of phase-  
157 separated condensates can perform physical work on their surroundings, including at the membrane-  
158 cytosol interface to generate membrane curvature<sup>35-38</sup>. Because of the demonstrated importance of  
159 disordered regions in Cavin1 for its assembly behaviour, we assessed whether purified Cavin1 is able  
160 to form supramolecular assemblies leading to LLPS *in vitro*.

161 Purified recombinant GFP-Cavin1 expressed in *E. coli* remains dispersed in solution at both  
162 physiological NaCl concentration (150 mM) and at high NaCl concentration (750 mM) within a  
163 protein concentration range of 1 to 10  $\mu\text{M}$  (**Fig. S3A**). However, when Dextran T-500 (1.25% w/v)  
164 was added as a macromolecular crowding agent<sup>39, 40</sup> full-length GFP-Cavin1 rapidly formed  
165 spherical liquid droplets at 150 mM NaCl even at low protein concentrations (0.1  $\mu\text{M}$ ) (**Fig. 2A; Fig.**  
166 **S3B and Fig. S3C**). This is well below the estimated cellular concentration of Cavin1 of 3  $\mu\text{M}$ <sup>41</sup>.  
167 These droplets increased in size with increasing protein concentration in the range 1 to 10  $\mu\text{M}$  (**Fig.**  
168 **2A**). Increasing the salt concentration strongly inhibited the ability of GFP-Cavin1 to undergo LLPS,  
169 consistent with a role for electrostatic intermolecular interactions<sup>20, 42</sup>. We also tested both purified  
170 full-length Cavin1-GFP isolated from mammalian HEK293 cells, and unpurified Cavin1-GFP in  
171 MCF7 cell lysates, and found that both preparations underwent similar salt-sensitive LLPS (**Fig. S3D**  
172 **and S3E**) although this required a higher concentration of Dextran T-500 (3%), possibly due to the  
173 presence of other bound proteins, lipids, or post-translational modifications such as phosphorylation,  
174 ubiquitylation and SUMOylation present in the mammalian cell expression system partially

175 modifying the properties of Cavin1. Higher concentrations of Dextran T-500 (3%) did not  
176 significantly alter the LLPS behaviour of GFP-Cavin1 (**Fig. S3F**). Lastly, we assessed if Cavin1  
177 could undergo LLPS in cells. When over-expressed in MCF7 cells, which lack caveolae due to the  
178 absence of CAV1, we found that GFP-Cavin1 on its own remained diffuse and did not form droplets  
179 (**Fig. S4A and S4B**). However, after testing several conditions we discovered that if cells were treated  
180 with cholesterol following serum starvation GFP-Cavin1 rapidly formed cytoplasmic condensates as  
181 well as membrane-associated tubules (**Fig. S4C and S4D**). We then expressed GFP-Cavin1 in MCF7  
182 cells together with an mCherry-CAAX construct as a plasma membrane marker (**Fig. S4E**). After  
183 cholesterol addition, we observed plasma membrane localization of GFP-Cavin1 and formation of  
184 GFP-Cavin1 and mCherry-CAAX positive plasma membrane-associated tubules. Similar results  
185 were observed in CAV1<sup>-/-</sup> mouse embryonic fibroblasts (MEFs) (**Fig. S4F**). We speculate that  
186 cholesterol may alter the normal equilibrium of Cavin1's interaction with phospholipid membranes,  
187 thus promoting self-association and condensation.

188 Deletion of the C-terminal DR3 domain had a small but reproducible effect on the tendency  
189 of Cavin1 to undergo LLPS *in vitro*, with droplet formation showing greater sensitivity to increasing  
190 ionic strength and protein concentration (**Fig. 2A; Fig. S3B and S3C**). Deletion of the DR1 domain  
191 however had a dramatic effect, leading Cavin1 to transition into non-spherical coacervates at all  
192 protein and salt concentrations (**Fig. 2A; Fig. S3B and S3C**). Fluorescence recovery after  
193 photobleaching (FRAP) was used to analyse the diffusion of proteins within the liquid droplets and  
194 the ability of GFP-Cavin1 to exchange with bulk solution. GFP-Cavin1 ( $\tau_{1/2} \sim 20$ s) and GFP-Cavin1-  
195  $\Delta$ DR3 ( $\tau_{1/2} \sim 10$ s) showed rapid fluorescence recovery after photobleaching, indicating there is ready  
196 exchange of protein molecules within the droplets as expected for liquid droplets (**Fig. 2B, 2C**). GFP-  
197 Cavin1- $\Delta$ DR1, however, showed virtually no recovery (**Fig. 2B, 2C**), suggesting that gel formation  
198 has occurred and the truncated protein is unable to diffuse within the condensates<sup>19,43</sup>. Overall, these  
199 analyses highlight the importance of electrostatic interactions in promoting self-association and  
200 subsequent LLPS behaviour by Cavin1, and points to distinct roles of DR1 and DR3 sequences in  
201 this process.

202

### 203 **Cavin1 promotes co-phase separation with N-terminal regions of CAV1**

204 Although Cavin1 and CAV1 are associated together in caveolae, it remains unclear whether they  
205 interact with each other via direct protein-protein interactions. CAV1 has a unique structural domain  
206 architecture shared with other caveolins, consisting of an N-terminal disordered region (DR) (1-60),  
207 followed by an oligomerization domain (OD) (61-80), scaffolding domain (CSD) (81-100),  
208 intramembrane domain (IMD) (101-133) and a C-terminal membrane associated  $\alpha$ -helical domain  
209 (134-179) (**Fig. 3A; Fig. S5A and S5B**)<sup>2,5</sup>. We hypothesized that the N-terminal disordered sequence

210 of CAV1 may enable CAV1-Cavin1 association through interactions involving liquid-liquid phase  
211 separation. To test this, we first purified full length CAV1 fused with Maltose binding protein (MBP)  
212 and GFP-binding nanobody protein (GBP)<sup>44</sup> in non-ionic detergent n-dodecyl  $\beta$ -D-maltoside (DDM)  
213 (1.2 mM). MBP-GBP-CAV1 was labelled bound with GFP for visualization, and unlabelled purified  
214 Cavin1 was used in a co-phase separation assay (**Fig. 3B and 3C**). Like GFP-Cavin1, unlabelled  
215 Cavin1 formed liquid droplets with addition of dextran T-500 (1.25% w/v) observed in bright field  
216 image as transparent liquid drops. In the absence of Cavin1 MBP-GBP-CAV1 did not undergo LLPS  
217 on its own (**Fig. 3B**). However, when GFP-labelled MBP-GBP-CAV1 was mixed with Cavin1 it was  
218 recruited to Cavin1 liquid droplets (**Fig. 3C**). Interestingly MBP-GBP-CAV1 appeared to form a shell  
219 around the Cavin1 droplets rather than complete co-mixing.

220 We next probed the mutual roles of Cavin1 and CAV1 disordered sequences in Cavin1-CAV1  
221 co-phase separation. To this end we generated several mCherry-tagged truncation mutants in the  
222 region CAV1 (1-100) encompassing the disordered N-terminus, oligomerization and scaffolding  
223 domains (**Fig. 3A**). Similar to previous reports we found that mCherry-CAV1(1-100) formed a higher  
224 molecular weight oligomer by gel-filtration, while any truncations of this sequence resulted in  
225 monomeric proteins (**Fig. S5C**)<sup>13</sup>. Like full-length MBP-GBP-CAV1, the mCherry-CAV1(1-100)  
226 sequence was able to undergo LLPS with GFP-Cavin1 droplets, again forming an outer shell around  
227 the core GFP-Cavin1 droplets (**Fig. 3D**). In contrast truncated mCherry-CAV1 constructs (1-30), (30-  
228 80) and (1-80) were all unable to co-phase separate with GFP-Cavin1, and we also observed similar  
229 results using unlabelled Cavin1 (**Fig. S5D**). Interestingly, while mCherry-CAV1(1-100) was able to  
230 co-phase separate with the Cavin1 N-terminal deletion GFP-Cavin1- $\Delta$ DR1, it did not associate with  
231 droplets formed by the C-terminal deletion of GFP-Cavin1- $\Delta$ DR3 (**Fig. 3D**) suggesting that the  
232 Cavin1 DR3 sequences are essential for CAV1 – Cavin1 association.

233 Sequence alignment of CAV1, CAV2 and CAV3 highlighted several interesting features  
234 including an overall conserved but disordered region (30-80) containing two identical motifs,<sup>54</sup>RDP<sup>56</sup>  
235 and <sup>68</sup>FEDVIAEP<sup>75</sup> (**Fig. S5A and S5B**). The N-terminal CAV1 disordered region (1-30) however,  
236 was not conserved in CAV2 or CAV3. To further pinpoint the sequence requirements of CAV1 and  
237 Cavin1 interaction, we made five mutations in mCherry-CAV1(1-100) (**Fig. 3A**). The two highly  
238 conserved motifs <sup>54</sup>RDP<sup>56</sup> and <sup>68</sup>FEDVIAEP<sup>75</sup> were mutated to alanine, or random glycine and serine  
239 (mutants M1 and M2 respectively). The last three mutants (M3, M4 and M5) replaced charged  
240 residues (Glu, Asp, Arg, Lys) with alanine in the entire disordered region (1-80) (mutant M3), non-  
241 conserved DR fragment (1-30) (mutant M4) and conserved DR fragment (30-60) (mutant M5). CAV1  
242 mutants M1, M2, M4 and M5 all formed oligomers similar to wild-type mCherry-CAV1(1-100) as  
243 assessed by their gel filtration profiles, whereas mutant M3 surprisingly migrated as a monomer (**Fig.**  
244 **S5C**). Mutants mCherry-CAV1(1-100) M1, M2 and M4 underwent co-phase separation with GFP-



245 Cavin1 similar to the wild-type CAV1(1-100), while mutants M3 and M5 failed to associate with  
246 Cavin1 droplets (**Fig. 3D**). These results confirm that the mCherry-CAV1(1-100) interaction with  
247 GFP-Cavin1 is highly specific and depends on charged residues within the CAV1(30-60) region.  
248 Overall, these studies indicate that the association between CAV1 and Cavin1 may be driven at least  
249 in part by interactions involving liquid phase condensation, with co-mixing mediated by their  
250 respective disordered sequences.

251 Studies of caveolin mutants in cells are typically challenging due to their disrupted trafficking  
252 and mis-localisation<sup>2, 4, 6, 45-51</sup>. Nevertheless, we assessed the localisation of the N-terminal GFP  
253 tagged CAV1 mutants (M1 – M5) in the context of the full-length protein and in the presence of  
254 Cavin1-mCherry in MCF7 cells (**Fig. S6A**). GFP-CAV1-WT showed the familiar punctate  
255 distribution in MCF7 cells that co-localised with Cavin1-mCherry, as did the mutant M4. In contrast  
256 the GFP-CAV1 mutants M1 and M5 were not associated with mCherry-Cavin1 at the plasma  
257 membrane, and the M2 and M3 mutants were either not expressed or rapidly degraded and could not  
258 be detected. Comparison with several organelle markers indicated that mutant GFP-CAV1-M1 was  
259 mis-trafficked and accumulated in the Golgi, similar to what was seen with the analogous  
260 CAV3(R26Q) dystrophic mutation<sup>45</sup> (**Figs. S6B-S6E**). GFP-CAV1-M5 was mostly mis-localised to  
261 lipid droplets, with some diffuse plasma membrane localisation and overlap with endosomes. This  
262 phenotype was similar to that observed previously when a putative COPII-binding sequence in the  
263 CAV1 N-terminus was mutated (D67G)<sup>4</sup>. Overall these experiments generally correlate with *in vitro*  
264 studies, where mutations impacting co-phase separation with Cavin1 do not associate with Cavin1 at  
265 the cell surface, are unable to form caveolae and are either degraded or mis-localised in cells.

266

### 267 **The Cavin1 DR sequences are essential for membrane remodelling *in vitro***

268 We previously showed that Cavin1 and Cavin2 possess an intrinsic ability to tubulate artificial lipid  
269 membranes using negative stain electron microscopy<sup>11</sup>. To examine this membrane remodelling by  
270 Cavin1 at higher resolution, we first performed cryoelectron microscopy (cryoEM) analysis of  
271 samples after mixing purified Cavin1 with small unilamellar vesicles (SUVs) composed of Folch  
272 lipid extracts. We observed formation of an extensive network of membrane tubules ( $34 \pm 5$  nm, 12  
273 tubules, 2 independent experiments) possessing a Cavin1 protein coat using both negative stain  
274 electron microscopy and cryoEM (**Fig. 4A**). Although tubulation of Folch membranes was most  
275 efficient, Cavin1 could also tubulate liposomes consisting of PC/PE/PI(4,5) $P_2$  (**Fig. S7A**). In addition,  
276 Cavin1-GFP expressed and purified from HEK293 cells could also tubulate Folch membranes  
277 similarly to the bacterially expressed protein (**Fig. S7B**). Examination of the Cavin1-coated tubules  
278 by cryoelectron tomography (cryoET) revealed a striated but relatively heterogeneous pattern of  
279 protein densities around the tubules (**Fig. 4B; Movie S1**). These are similar to structures previously

280 observed on the cytosolic face of caveolae using fast-freeze deep-etch<sup>52, 53</sup> and conventional EM  
281 methods<sup>54-56</sup>, and with the elongated rod-like structures of isolated Cavin1 observed by negative  
282 staining EM<sup>11</sup>. These experiments indicate that Cavin1 possesses an inherent membrane remodelling  
283 activity, driven by large scale oligomeric assembly on the membrane surface.

284 The importance of Cavin1 DR domains in self-association and LLPS raised the question as to  
285 whether they play a role in its ability to physically remodel membranes. To this end, we used the *in*  
286 *vitro* membrane remodelling assay to investigate their importance in generating membrane curvature.  
287 We expressed and purified a range of Cavin1 DR domain truncations with an N-terminal His-  
288 ubiquitin (HisUb) tag (**Fig. 4C; Fig. S2**) and used the membrane tubulation assay combined with  
289 negative stain EM to analyse their ability to remodel mammalian (Folch) synthetic phospholipid  
290 membranes (**Fig. 4D**). Complete removal of either the N-terminal DR1 or C-terminal DR3 domains  
291 abolished the ability of Cavin1 to tubulate liposomes *in vitro*. Shorter truncations showed that while  
292 the N-terminal DR1 deletion Cavin1(10-392) still formed membrane tubules, these were relatively  
293 infrequent and of a smaller diameter (~10 nm), whereas further deletion of N-terminal DR1 sequences  
294 in Cavin1(30-392) prevented the formation of membrane tubules altogether. The C-terminal DR3  
295 deletion mutant Cavin1 (1-345) formed membrane tubules similar to full length Cavin1. However,  
296 the deletion of further amino acids from the C-terminus in Cavin1(1-330) completely inhibited  
297 membrane tubulation. For those DR truncation mutants that lacked membrane remodelling activity  
298 we observed instead a propensity to cause liposome clustering. This likely occurs because these  
299 Cavin1 constructs can now bind adjacent phospholipid vesicles via multiple positively charged  
300 surfaces of the HR1 and HR2 domains, unrestrained by compensating negatively-charged DR1 and  
301 DR3 sequences<sup>11</sup>. Overall, these studies define a core Cavin1 sequence (10-345) required for Cavin1  
302 to efficiently promote membrane curvature.

303 We next examined the ability of purified GFP-Cavin1 to modulate Folch lipid giant  
304 multilamellar vesicles (GMVs) doped with 0.1 mol% fluorescent Bodipy-TMR PI(4,5)P<sub>2</sub> analogue.  
305 GFP-Cavin1 showed strong localised clustering at the membrane surface compared to other  
306 membrane remodelling proteins (**Fig. 5A**)<sup>57, 58</sup>, and possessed a remarkable membrane sculpting  
307 activity as indicated by the rapid collapse of GMVs over a period of several minutes (**Fig. 5B**). We  
308 performed similar experiments with Rhodamine B-PE as a fluorescent marker and observed the same  
309 protein clustering and membrane sculpting activity (**Fig. S7C**). In contrast, although both the N- and  
310 C-terminal DR deletions of Cavin1 still bound efficiently to GMVs, they did not display any  
311 significant membrane sculpting activity (**Fig. 5C, 5D**). With Cavin1-ΔDR1 we also often observed a  
312 characteristic accumulation of the protein at the interface between adjoining vesicles leading to the  
313 clustering of the GMVs (**Fig. 5E**). Overall, these studies using GMVs and SUVs show that while the

314 DR1 and DR3 domains are dispensable for membrane binding, they have an essential role in the  
315 ability of Cavin1 to sculpt the curvature of phospholipid membranes.

316

### 317 **Cavin1 disordered sequences are essential for interacting with CAV1 and forming caveolae**

318 Our studies *in vitro* highlight several properties of Cavin1 that are dependent on its disordered  
319 sequences. Firstly, DR1 and DR3 of Cavin1 are important for the formation of a large scale associated  
320 state and LLPS promoted by electrostatic interactions, and the DR1 domain is required for the  
321 dynamic properties of Cavin1 in LLPS; removal of the DR1 domain results in gel formation and  
322 prevents its free diffusion within the condensates. The Cavin1- $\Delta$ DR1 construct also displays a  
323 capacity to bind and cluster membrane vesicles *in vitro*. Secondly, minimal sequences of Cavin1 DR1  
324 and DR3 are required for membrane remodelling. Lastly, the C-terminal DR3 domain of Cavin1 is  
325 required for the association with CAV1 in co-mixed liquid droplets *in vitro*.

326 To examine the importance of Cavin1 disordered N- and C-terminal domains to functional  
327 caveola formation, we next analysed the localisation of the DR1 and DR3 truncation mutants in cells  
328 using either standard confocal microscopy (**Fig. S8A**) or confocal fluorescence with Airyscan super-  
329 resolution imaging (**Fig. 6A**). The prostate cancer PC3 cell line was used, which expresses CAV1 but  
330 does not express any members of the Cavin family so that CAV1 is diffusely localised at the plasma  
331 membrane <sup>7, 9</sup> (**Fig. S8A**). Expression of full-length GFP-Cavin1 in PC3 cells fully restores the  
332 formation of caveolae with CAV1 (in the absence of other cavins), providing a functional readout for  
333 Cavin1 activity <sup>7, 9, 10, 59</sup>. Full length GFP-Cavin1 showed a characteristic punctate distribution and  
334 co-localised with CAV1 at the plasma membrane (**Fig. S6A; Fig. S8A**). In contrast, after removal of  
335 the C-terminal domain GFP-Cavin1- $\Delta$ DR3 is unable to promote caveola formation, does not co-  
336 localise with CAV1, and now associates extensively with microtubules. This is consistent with a  
337 previous report of a similar C-terminal truncated Cavin1 (residues 1-322) in CHO cells <sup>60</sup>. FRAP  
338 analysis of GFP-Cavin1- $\Delta$ DR3 on microtubules showed a fast fluorescence recovery, indicating a  
339 dynamic exchange with the cytoplasm or diffusion along the microtubules (**Fig 6B, Movie S2**).  
340 Interestingly, when microtubules were depolymerised with nocodazole this resulted in redistribution  
341 and condensation of GFP-Cavin1- $\Delta$ DR3 to form spherical droplets in the cytosol (**Fig. 6C; Fig. S8B;**  
342 **Movie S3**). These also showed fast exchange of protein molecules with the bulk cytoplasm suggestive  
343 of liquid-droplet behaviour, and consistent with droplet formation by Cavin1- $\Delta$ DR3 *in vitro*. This  
344 indicates a dynamic equilibrium exists between cytosolic, liquid droplet and microtubule-associated  
345 states of the GFP-Cavin1- $\Delta$ DR3 truncation.

346 Strikingly, expression of GFP-Cavin1- $\Delta$ DR1 resulted in the formation of large intracellular  
347 structures that also contained endogenous CAV1 (**Fig. 6A; Fig. S8A**). A C-terminal tagged Cavin1-  
348  $\Delta$ DR1-GFP construct showed similar clusters co-localised with CAV1, confirming this phenotype is

349 not influenced by the location of the GFP tag (**Fig. S8C**). To analyse these structures in more detail,  
350 we performed co-localisation experiments of GFP-Cavin1- $\Delta$ DR1 with various cellular markers.  
351 While no overlap was seen with the Golgi complex, lysosomal or recycling endosomal membrane  
352 markers, a significant proportion of GFP-Cavin1- $\Delta$ DR1 and endogenous CAV1 were found to  
353 colocalise with the early endosomal marker EEA1 (**Fig. S9A**). Airyscan microscopy revealed that  
354 clusters of EEA1-positive endosomes surrounded the GFP-Cavin1- $\Delta$ DR1 and CAV1-positive  
355 structures (**Fig. 6D; Fig. S9B**). We then performed transferrin uptake assays in PC3 cells using  
356 transferrin labelled with Alex-488 fluorescent dye. Transferrin positive endosomes showed little  
357 overlap with full-length mCherry-Cavin1-positive spots on the cell surface (**Fig. S10**). However, the  
358 mCherry-Cavin1- $\Delta$ DR1 construct formed intracellular clusters with transferrin positive endosomes  
359 surrounding them similar to EEA1. These large intracellular structures were visualised by APEX  
360 labelling and electron microscopy imaging <sup>61</sup> of GFP-Cavin1- $\Delta$ DR1 in PC3 cells, revealing  
361 intracellular assemblies consisting of large clusters of vesicles with a surrounding halo of GFP-  
362 Cavin1- $\Delta$ DR1 labelling (**Fig. 6E**). In contrast, GFP-Cavin1 expression resulted in formation of the  
363 characteristic single caveolae and rosettes of caveolae at the plasma membrane as expected (**Fig. 6E**).

364 We lastly performed live imaging of PC3 cells expressing either GFP-Cavin1 or GFP-Cavin1-  
365  $\Delta$ DR1 with Rab5a-mCherry as a marker of early endosomes. Caveolae are consistently localised to  
366 the trailing edge of migrating cells, where constant membrane remodelling events are occurring <sup>62</sup>. In  
367 migrating PC3 cells we observe dynamic GFP-Cavin1 positive caveola puncta undergoing transient  
368 fission and fusion events and kiss-and-run interactions with Rab5a-mCherry positive endosomes  
369 similar to previous observations <sup>63</sup> (**Fig. 6F, Movie S4**). In contrast, GFP-Cavin1- $\Delta$ DR1 initially  
370 showed plasma membrane puncta fusion events similar to GFP-Cavin1 (imaged at an early 12 h time  
371 point following transfection before larger immobile condensates are formed), but over time resulted  
372 in formation of the larger structures that stably associated with Rab5a positive endosomes (**Fig. 6F,**  
373 **Movie S5**). This suggests that the DR1 domain is important for the dynamics of intracellular  
374 trafficking and recycling of caveolae at endosomes. Overall, our results show that disordered  
375 sequences of Cavin1 are essential for generating caveolae, but that each DR domain has a distinct  
376 function. Removing the C-terminal DR3 domain prevents interaction with CAV1 and results in mis-  
377 localisation to the cytoplasm and abnormal association with microtubules. Removing the N-terminal  
378 DR1, which results in gel formation and membrane clustering *in vitro*, allows initial caveola  
379 formation with CAV1 at the plasma membrane, but then causes subsequent accumulation of aberrant  
380 intracellular protein and membrane assemblies with a subset of early endosomes unable to recycle to  
381 the plasma membrane.

382

### 383 **Minimal Cavin1 DR sequences needed for membrane remodelling are also essential for caveola** 384 **formation**

385 Using the series of truncations tested *in vitro* for membrane remodelling activity, we next asked if the  
386 same minimal sequences are sufficient for caveola formation in cells. GFP-Cavin1(10-392) showed  
387 a relatively normal localisation with CAV1 puncta at the cell surface. However, GFP-Cavin1(30-392)  
388 formed large intracellular puncta and clusters that co-localised with CAV1 (**Fig. 7A**), and also showed  
389 a partial co-localisation with EEA1 (**Fig. S9C**), similar to Cavin1 with the complete DR1 domain  
390 removed. Thus, deletion of the N-terminal DR1 sequence of Cavin1 has a progressive effect on the  
391 re-distribution of caveolae from the plasma membrane to intracellular endocytic compartments.

392 The C-terminal DR3 truncation GFP-Cavin1(1-345) retained a normal ability to generate  
393 plasma membrane puncta that co-localised with CAV1 (**Fig. 7A**), and APEX labelling and electron  
394 microscopy of GFP-Cavin1(1-345) showed its typical localisation to caveolae at the plasma  
395 membrane (**Fig. 7B**). Further deletion of C-terminal DR3 sequences in GFP-Cavin1(1-330), however,  
396 resulted in a total cytosolic redistribution. The C-terminal truncations show that amino acids (346-  
397 392) are dispensable for generating caveolae in PC3 cells, while residues 330-345 are essential.  
398 Finally, we used a proximity ligation assay (PLA)<sup>10</sup> to assess the interactions of Cavin1 C-terminal  
399 truncations with CAV1 at the plasma membrane. PLA analyses correlated with the cellular imaging  
400 of the GFP constructs, showing that the mutant Cavin1(1-345) can interact with (or is at least in close  
401 proximity to) CAV1, while the shorter truncations Cavin1(1-330) and Cavin1(1-310) do not (**Fig.**  
402 **7C; Fig. S11**).

### 403 404 **Specific DR sequences are essential for the ability of Cavin1 to form caveolae**

405 The disordered sequences 1-30 and 310-345 in DR1 and DR3 are required for Cavin1 to efficiently  
406 self-associate, remodel synthetic phospholipid membranes *in vitro*, and promote caveola formation  
407 with CAV1 in cells. To examine these sequences in more detail we generated a series of specific  
408 mutations in the DR1, DR2 and DR3 domains in the context of the minimal functional construct  
409 Cavin1(1-345) (**Fig. 8A**). Beginning with DR1 (residues 1-30), we first tested whether the acidic  
410 amino acids were important by mutating the Glu/Asp residues to alanine (DR1mut1). When GFP-  
411 tagged Cavin1(1-345) DR1mut1 was expressed in PC3 cells it formed large intracellular puncta that  
412 co-localised with CAV1 (**Fig. 8B**), and also colocalised with a sub-population of EEA1-positive  
413 endosomes, but not LAMP1 or GM130 (**Fig. S12A**). APEX labelling and imaging by EM showed  
414 clusters of GFP-Cavin1(1-345) DR1mut1 that appeared identical to those formed by either GFP-  
415 Cavin1- $\Delta$ DR1 or GFP-Cavin1(30-392) (**Fig. S12B**). By FCS, this variant showed a significant  
416 increase in diffusivity with respect to wild-type Cavin1(1-345), indicating that its net negative charge  
417 is important for self-association (**Fig. S12C**). More precise mutation of Asp/Glu residues in the first

418 ten amino acids of DR1 (DR1mut2) had no qualitative effect on the ability of GFP-Cavin1(1-345) to  
419 form caveolae, while altering the Asp/Glu residues in amino acids 10-30 of DR1 (DR1mut3) resulted  
420 in the same phenotype as mutant DR1mut1 (or complete deletion of DR1), forming large intracellular  
421 clusters with CAV1 (**Fig. 8A and 8B**). We next substituted DR1(1-30) with random Gly/Ser  
422 sequences, while maintaining the relative positions of acidic Asp/Glu residues and prolines  
423 (DR1mut4). The objective was to determine if any other sequences apart from the acidic side chains  
424 contributed to the activity of the domain. In MCF7 cell lysates the DR1mut4 mutant did not show a  
425 major difference in diffusivity by FCS compared to wild-type Cavin1(1-345) indicating that only the  
426 acidic side-chains in the DR1 region are necessary for self-association (**Fig. S12C**). The subcellular  
427 localisation of GFP-Cavin1(1-345) mutant DR1mut4 in PC3 cells also showed co-localisation with  
428 CAV1 at the plasma membrane (**Fig. 8B**), indicating that it is the electrostatic properties of the DR1  
429 sequence that are most important for its function and not the specific sequence itself. However, the  
430 spacing of acidic residues in DR1 is critical, as complete removal of surrounding sequences  
431 (DR1mut5) also results in GFP-Cavin1(1-345) mis-localization. An analogous result was observed  
432 for the central DR2 domain of Cavin1, where mutation of the acidic residues (DR2mut6) abolished  
433 caveola recruitment in PC3 cells and prevented self-association in MCF7 cell lysates, but altering the  
434 surrounding sequences while maintaining negative charges had no effect on caveola formation  
435 (DR2mut7) (**Fig. 8C; Fig. S12C**). Thus, the presence and the spacing of acidic sequences in DR1 and  
436 DR2 are essential for normal caveola formation, but their specific surrounding sequences are not.

437 Lastly, we assessed the roles of specific sequences in the essential DR3 region (residues 311-  
438 345). The mutation of acidic Asp/Glu residues in GFP-tagged Cavin1(1-345) (DR3mut8) resulted a  
439 diffuse cytosolic localisation in PC3 cells (**Fig. 8D**) and prevented self-association in FCS  
440 measurements (**Fig. S12C**). These results show that the acidic Glu/Asp residues in the Cavin1 DR1,  
441 DR2 and DR3 domains are all essential for oligomeric interactions and forming caveolae with CAV1  
442 at the cell surface. The acidic side-chain mutations result in identical phenotypes to the complete  
443 truncation of the DR1 and DR3 domains. In contrast to the DR1 and DR2 domains however, we found  
444 that altering everything in DR3 other than Asp/Glu residues (DR3mut9) resulted in a protein with a  
445 normal ability to self-associate (**Fig. S12C**), but that was unable to restore caveola formation with  
446 CAV1 in PC3 cells (**Fig. 8D**). This protein was generally cytosolic, but in some cells we observed  
447 the formation of numerous spherical cytoplasmic structures, that dynamically exchange with the  
448 cytosol as shown by FRAP analysis and regularly undergo fusion, suggesting the protein has  
449 undergone LLPS and droplet formation (**Fig. 8E; Fig. S12D; Movie S6**). Remarkably however,  
450 unlike the complete DR3 deletion purified Cavin1(1-345) DR3mut9 is still able to remodel and  
451 tubulate synthetic liposomes *in vitro* (**Fig. S12E**). This shows that while specific sequences in the  
452 Cavin1 region 310-345 are dispensable for large scale oligomer formation, LLPS and membrane

453 remodelling, they are still essential for recruitment to caveolae with CAV1 in cells. The acidic side  
454 chains in this region, however, are required for all of these functional Cavin1 activities (mutant  
455 DR3mut8). To refine this further, we designed three shorter variants of the DR3mut9 mutation,  
456 DR3mut10 (311-320), DR3mut11 (321-331), and DR3mut12 (332-345). While mutant DR3mut12  
457 behaved like wild-type Cavin1 and formed normal caveolae, both mutant DR3mut10 and DR3mut11  
458 showed a cytosolic distribution similar to DR3mut9 (**Fig. 8D**). Therefore, specific sequences in the  
459 Cavin1 DR3 region 311-331 are specifically required for CAV1 association and caveola formation,  
460 while acidic residues within DR3 region (332-345) are essential for promoting electrostatic  
461 oligomeric Cavin1 assembly. Lastly, we quantified the co-localization of those Cavin1 DR mutants  
462 that still retained prominent association with CAV1 (**Fig S12F**). While the sequences altered in these  
463 constructs are not strictly required for caveola formation (e.g. DR1mut2 or DR3mut12) or CAV1  
464 interaction (e.g. DR1mut1, DR1mut3 or DR1mut5), they all showed a marginal reduction in co-  
465 localization suggesting they make a minor contribution to Cavin1-CAV1 interactions. Altogether,  
466 these studies demonstrate the critical importance of acidic residues in all three DR domains for  
467 promoting electrostatic intermolecular interactions and caveola formation; while specific sequences  
468 in Cavin1 DR3 region (311-331) are necessary for Cavin1 and CAV1 association for caveola  
469 recruitment.

470

471

472

473

## 474 Discussion

475 Despite the fact that intrinsically disordered sequences are a prominent and highly conserved feature  
476 of all cavins, no previous studies have explicitly addressed their functional importance. We now show  
477 that they are essential for caveola formation. In addition, they also regulate the ability of Cavin1 to  
478 self-associate and undergo LLPS *in vitro*, where Cavin1 shows the classical properties of LLPS as  
479 demonstrated by phase separation that is sensitive to protein concentration, ionic strength, molecular  
480 crowding agents, and by the rapid exchange of protein in Cavin1 droplets as shown by FRAP. The  
481 sensitivity of this LLPS to salt concentration indicates an electrostatically driven Cavin1  
482 condensation. We demonstrate the distinct roles of the disordered DR domains of Cavin1 in LLPS  
483 behaviour, including a mutant protein lacking the DR1 domain that still self-associates but no longer  
484 shows the dynamic exchange properties of the full-length protein. In addition, CAV1 was also able  
485 to associate with Cavin1 generated liquid droplets, an interaction that is dependent on their mutual  
486 disordered sequences. Our cellular studies show that acidic residues in all three Cavin1 disordered  
487 sequences (DR1, DR2 and DR3) are essential for generating caveolae with CAV1 at the plasma  
488 membrane. Deletion or mutation of these regions in Cavin1 result in mis-localisation and an inability  
489 to form plasma membrane caveola invaginations. Interestingly the N- and C-terminal sequences play  
490 divergent roles in this process. Deletion of the N-terminal DR1 domain affects caveola dynamics and  
491 leads to the formation of large intracellular clusters of Cavin1, CAV1, and endosomal membrane  
492 vesicles. In contrast, deletion of the DR3 domain prevents CAV1 association *in vitro* and *in vivo* and  
493 results in dynamic microtubule association or cytoplasmic droplet formation. We speculate that  
494 Cavin1- $\Delta$ DR3 association with microtubules may share mechanistic similarities with the  
495 condensation of Tau on microtubules<sup>64,65</sup>, or interactions of multivalent positively-charged peptides  
496 with the C-terminal acidic tails of tubulin subunits<sup>66</sup>, but this will require further study.

497 To better appreciate and visualise the role of the disordered DR domains in Cavin1 activity,  
498 we constructed a theoretical structural model of the protein, building on the assumption that the  
499 fundamental Cavin1 unit is a homotrimer based on the coiled-coil structure of its N-terminal HR1  
500 domain<sup>11</sup> (see Materials and Methods) (**Fig. 9A**). This model points to several interesting features of  
501 the Cavin1 protein. Firstly, the combined DR1, DR2 and DR3 domains account for more than 50%  
502 of the total Cavin1 sequence. In other words, Cavin1 is not a typical globular protein but rather  
503 consists of large random-coil elements tethered by  $\alpha$ -helical structural cores. Secondly, as suggested  
504 by sequence analyses (**Fig. S1**), there is a distinctive electrostatic pattern to the structure, with the  $\alpha$ -  
505 helical domains providing positively charged surfaces for membrane association, and the disordered  
506 regions having a generally negatively charged nature. A likely consequence of this is that electrostatic  
507 repulsion will cause these DR domains to orient outwards when Cavin1 is in contact with membranes,  
508 and we propose they will also form transient electrostatic interactions with the HR domains of



509 neighbouring Cavin1 molecules (**Fig. 9B**). Notably, multiple theoretical and experimental studies  
510 have shown that the sequence-specific electrostatically driven interactions between disordered  
511 proteins can lead to LLPS and high affinity protein complex formation under physiological  
512 conditions, with the tendency to phase separate (or undergo ‘complex coacervation’) increasing as  
513 the ‘blockiness’ of the charge distribution increases<sup>67-72</sup>.

514 Our studies of the DR domains of Cavin1 confirm that the acidic residues within these  
515 domains are essential for the formation of caveolae in cells and promotion of membrane remodelling  
516 *in vitro*. By what mechanism might the DR domains contribute to these membrane sculpting  
517 activities? Several recent studies have demonstrated the ability of intrinsically disordered sequences  
518 to generate membrane curvature when coupled to membrane binding domains<sup>57, 73-75</sup>. This is caused  
519 by molecular crowding of the disordered sequences leading the proteins to partition with curved or  
520 convex membranes so as to increase their conformational entropy; and this can also be enhanced by  
521 electrostatic repulsive forces both between the disordered domains and with the membrane itself (**Fig.**  
522 **9C**). One possible mechanism we can propose for Cavin1-driven membrane curvature is that  
523 negatively charged DR sequences and positively charged HR regions of Cavin1 combine to promote  
524 self-association, membrane interaction and protein crowding at the membrane surface leading to  
525 subsequent membrane bending. In the absence of CAV1 and at high protein concentrations *in vitro*,  
526 or under certain conditions in cells, Cavin1 can generate arrays of protein oligomers to form  
527 membrane tubules. Under normal conditions however, the process of generating membrane curvature  
528 is tightly regulated by CAV1, EHD2 and Pacsin2, and also specific membrane lipids, to restrict  
529 Cavin1 remodelling activity only to caveolae. We see an almost complete correlation between the  
530 ability of different Cavin1 truncations and mutants to tubulate membranes *in vitro* and the ability to  
531 form caveolae *in situ*. The notable exception to this is that alteration of sequences in the DR3 region  
532 310-331 does not affect the ability of Cavin1 to assemble into oligomers and efficiently tubulate  
533 synthetic membranes, but still results in a failure to generate caveolae in cells. This implies these  
534 specific sequences in the Cavin1 DR3 region are additionally required for Cavin1 recruitment to  
535 CAV1-positive membrane domains through interactions with the disordered CAV1 N-terminus.

536 A second mechanism for membrane curvature suggested by our results (and not mutually  
537 exclusive with a role for molecular crowding) is the formation of phase-separated Cavin1 domains  
538 that incorporate membrane-embedded CAV1. Intrinsically disordered regions of proteins have gained  
539 significant attention for their ability to promote LLPS, or biomolecular condensation, with important  
540 biological functions such as stress granule formation, assembly of nuclear sub-structures and sensing  
541 changes in cellular homeostasis<sup>19, 76</sup>. The plasma membrane and surfaces of intracellular  
542 compartments including the ER and lysosomes have been found to play a role in LLPS, acting as sites  
543 of droplet nucleation or as platforms for transport of phase-separated assemblies for example<sup>23-34</sup>. It

544 has also recently been proposed that biomolecular condensates associated with phospholipid  
545 membranes might possess emergent mechanical properties that can result in membrane curvature  
546 generation<sup>35-37</sup>. This is depicted in schematic form in **Fig. 9D**. Here we have shown for the first time  
547 that purified Cavin1 can readily undergo LLPS under near physiological conditions and is able to  
548 recruit CAV1 through interactions involving LLPS. The DR1 and DR3 domains contribute to this  
549 process, although neither domain is strictly essential. Indeed, mutations in DR3 that maintain its  
550 negative charge but prevent CAV1 interaction at the plasma membrane actually promote GFP-Cavin1  
551 liquid droplet formation in cells. Notably, removal of the DR1 domain results in apparent gel  
552 formation rather than liquid droplet assembly *in vitro*, and within cells results in a striking  
553 accumulation of large intracellular structures that also contain CAV1. These are formed by endocytic  
554 redistribution of caveola structures from the cell surface and accumulation with early endosomal  
555 membranes. Caveolae, positive for both CAV1 and Cavin1, have been shown to bud from the plasma  
556 membrane and fuse with early endosomal compartments<sup>46, 77-81</sup>, and this would almost certainly  
557 require dynamic remodelling of the protein coat to allow the fusion process to occur. We postulate  
558 that the intracellular structures we observe with Cavin1- $\Delta$ DR1 are formed by internalised caveolae,  
559 which have become trapped during the stage of early endosomal fusion. This may be due to the DR1-  
560 truncated Cavin1 being unable to undergo normal dynamic exchange, as suggested by its gel-forming  
561 properties and its propensity to cluster membrane vesicles, causing inhibition or slowing of the  
562 docking and fusion with the early endosome in a process involving EEA1 and Rab5a<sup>80, 82</sup>.

563 Our data indicates that the assembly of caveolae by Cavin1 strictly depends on a ‘fuzzy’  
564 network of interactions promoted by electrostatic associations, with an essential role for the  
565 intrinsically disordered DR domains of Cavin1 in self-association, CAV1 interaction, membrane  
566 remodelling and ultimately caveola formation. Fuzzy interactions are defined broadly as those that  
567 involve dynamic, exchanging, multivalent interactions with varying degrees of protein disorder or  
568 structural ambiguity<sup>83-85</sup>. This provides versatility and reversibility in protein-protein interactions,  
569 and such fuzzy interactions are also proposed to be a driver of protein phase transitions<sup>19</sup>. One of the  
570 historically consistent observations regarding caveolae is that they do not possess an obvious or  
571 highly ordered coat morphology akin to clathrin or COP-coated vesicles. In previous studies of  
572 caveola architecture it is notable that while some recurring structures are observed, the general  
573 appearance of the caveola surface is extremely heterogeneous<sup>54-56, 86</sup>. Our model for caveola assembly  
574 and structure differs markedly from other classical membrane coats such as clathrin or COPI and  
575 COPII, which are built from symmetrical arrays of structured protein domain interactions. While  
576 structural elements of cavins and caveolins will likely produce semi-regular spacings between the  
577 building blocks, the flexible nature of the disordered domains that provide the ‘glue’ for caveola  
578 assembly mean that the overall organisation of the coat will be highly dynamic. Caveola formation is

579 the result of multiple low affinity fuzzy interactions between Cavin1, CAV1 and membrane lipids,  
580 and we propose that this leads to a metastability in caveola structure that is important in both the  
581 dynamic cycling of caveolae through the endocytic pathway and also for their ability to respond to  
582 stresses by rapid disassembly.

583

584

## 585 **Materials and methods**

### 586 **Cell lines maintenance and materials**

587 PC3 cells were maintained in RPMI medium (Gibco® Life technologies) supplemented with 10%  
588 fetal bovine serum (FBS) and Penicillin/Streptomycin. Cell lines were sourced from ATCC and tested  
589 fortnightly for mycoplasma contamination. For all experiments,  $2 \times 10^5$  PC3 or MCF7 cells were  
590 plated in either 6 well culture dishes (Nunc™, Cat. No. 140675, Culture area -  $9.6 \text{ cm}^2$ ) or glass  
591 bottom 35 mm dishes (ibidi, No. 1.5 glass coverslip bottom Cat No. 81218) or 35mm tissue culture  
592 dishes (TPP® 93040, culture area -  $9.2 \text{ cm}^2$ ). Antibodies used were as follows, rabbit polyclonal anti-  
593 Caveolin1 (BD Transduction Laboratories, Cat. No. 610060), mouse monoclonal anti-GFP (Roche  
594 Diagnostics Cat. No. 11814460001), Donkey anti-Rabbit IgG (H+L) Secondary Antibody Alexa  
595 Fluor® 555 conjugate (Thermo Fisher Scientific, Cat No. A31572). Mouse monoclonal anti-tubulin  
596 (Anti-alpha Tubulin antibody [DM1A] - Abcam (ab7291)). Folch lipids were obtained from Sigma  
597 Aldrich Folch I fraction (B1502).

598

### 599 **Molecular cloning and plasmids**

600 For Recombinant protein expression in *E. coli* two vectors (pHUE and pOPINE-GFP) were used to  
601 generate Cavin1 DR domain variants summarised in **Fig. S1**. pHUE vector was used to generate N-  
602 terminal 6X-Histidine-Ubiquitin tagged DR domain variants of Cavin1 using overlap extension  
603 polymerase chain reaction (OE-PCR) technique at SacII restriction enzyme site<sup>87</sup>. GFP tagged cavin  
604 DR domain variants were generated using pOPINE-GFP vector (in house vector with pOPINE  
605 backbone containing GFP) BamHI restriction enzyme site with N-terminal 6X-Histidine-Ubiquitin  
606 tag and C-terminal GFP tag using OE-PCR<sup>88</sup>. For mammalian cell expression constructs, eGFPC1  
607 and eGFPN1 vectors were used to generate respective DR domain Cavin1 mutants summarised in  
608 **Fig. S2**. Specific Cavin1 (1-345) DR domain genes (summarised in **Fig. 8A**) and all mCherry tagged  
609 CAV1 genes were artificially synthesized (Gene Universal) and selective genes were subsequently  
610 cloned into eGFPC1 and pHUE vectors using OE-PCR for mammalian and bacterial expression  
611 respectively.

612

### 613 **Recombinant protein expression and purification**

614 Recombinant protein expression was performed using *Eschericia coli* strain Rosetta™ 2 (DE3)  
615 (Novagen) (Merck Cat. No 71403). Protein expression was always performed using freshly  
616 transformed chemically competent *E. coli* Rosetta 2 cells with respective plasmids. Cell were  
617 propagated in either LB or TB media and protein expression was performed by inducing with 0.5  
618 mM IPTG (Isopropyl β-D-1-thiogalactopyranoside, Bioline, Cat No. BIO-37036) overnight at 18°C.

619 Next day, cells were harvested in 20 mM HepesKOH (pH 7.6), 500 mM NaCl (500GF buffer) with  
620 addition of benzamidine hydrochloride (Sigma Aldrich, B6506) and cOmplete™, EDTA-free  
621 Protease Inhibitor Cocktail Roche (Sigma Aldrich, 4693132001). Cleared cell lysates were prepared  
622 using a continuous flow cell disruptor (Constant Systems Limited, UK) at pressure range 25 – 30 kPsi  
623 with subsequent addition of 0.5 % w/v Triton X-100 (Cavin1 purification) or n-dodecyl β-D-  
624 maltoside (DDM) (1.2 mM) (MBP-GBP-CAV1 purification) and 5 mM imidazole (Sigma Aldrich,  
625 792527) followed by centrifugation 35,000x g for 30 min. Purification of 6X-Histidine tagged cavin  
626 proteins was done using TALON metal affinity resin (ClonTech, Scientifix Cat No. 635503). Talon  
627 resin was thoroughly washed with 500GF buffer containing 5 mM imidazole to remove detergent and  
628 non-specifically bound proteins, and elution was performed in 500GF buffer containing 300 mM  
629 imidazole. Protein samples were immediately loaded on size exclusion chromatography column  
630 Superose 6 10/30GL pre-equilibrated with 20 mM HepesKOH pH7.6, 150 mM NaCl (150GF buffer)  
631 or 150GF buffer with 1.2mM DDM detergent. Size exclusion profiles of purified Cavin truncation  
632 mutants are shown in **Fig. S11**. The purified protein used in assays (marked with arrows) appears to  
633 be slightly truncated but forms part of megadalton size full length protein complex eluting in higher  
634 molecular weight fractions (**Fig. S11**). This partial truncation can be due to presence of multiple  
635 protease sensitive PEST (proline, glutamate, serine, threonine) regions in DR sequences of Cavin1<sup>9</sup>.  
636 There has been evidence for the presence of truncated species of Cavin1 bound to native caveolae in  
637 cells suggesting that this might be an inherent property of this protein regardless of its source of  
638 expression<sup>7, 89</sup>.

639 Purification of mammalian Cavin1 was performed by Transfecting GFP-tagged Cavin1 using  
640 polyethylenimine (PEI) transfection reagent (Sigma-Aldrich Cat. No. 408727) with 1:4 w/w ratio  
641 (DNA:PEI) and cells were harvested 24 h post-transfection. Cell lysis was performed in 20 mM  
642 Hepes-KOH pH 7.6, 500 mM NaCl buffer containing 1% Triton X-100 with three times 3-s  
643 sonication pulse at output power 10. Lysate was then centrifuged at 5,000X g for 10 min, and  
644 supernatant fraction was incubated with purified GFP nanobody tagged with MBP for 30 min at 4°C.  
645 Finally, lysate nanobody mixture was incubated with amylose resin (NEB Cat No. E8021L) for 2 h  
646 at 4°C. Amylose resin was then extensively washed with 20 mM Hepes-KOH pH 7.6, 500 mM NaCl  
647 buffer containing 1% Triton X-100, and elution was performed in 20 mM Hepes-KOH pH 7.6, 500  
648 mM NaCl buffer containing 20 mM Maltose (Sigma-Aldrich Cat. No. M2250). Elute was  
649 concentrated with subsequent addition of Prescission protease to remove MBP tag and finally loaded  
650 on Superose 6 10/ 30GL size exclusion column equilibrated in 20 mM Hepes-KOH pH 7.6, 150 mM  
651 NaCl. Concentration of gel filtration elute was avoided as it leads to precipitation in lower salt  
652 content.

653

## 654 **Fluorescence correlation spectroscopy (FCS) analysis**

655 FCS analysis was performed on a Zeiss LSM 710 confocal microscope equipped with 40x/1.2W C-  
656 Apo lens and twin BiG GaAsP detectors capable of single molecule detection. Briefly, MCF7 cells  
657 were lysed in a buffer (200  $\mu$ l) containing 25 mM Tris (pH 7.4), 150 mM NaCl while passing through  
658 a 27G needle 6 times. Lysates were then centrifuged at 17,000x g for 10 min to remove cell debris.  
659 Supernatant was then used for FCS analysis. Purified GFP tagged cavin proteins were prepared for  
660 FCS by dilution of respective stock solutions of cavin truncates in either 500GF or 150GF buffer to  
661 achieve 0.1  $\mu$ M protein concentration with subsequent centrifugation at 17,000 X g for 10 min. At  
662 the beginning of each FCS session on a Zeiss LSM 710, pinhole calibration was done with BODIPY-  
663 FL maleimide dye (Cat. No. B30466). Subsequently, diffusion time for three dyes that differ in  
664 molecular weight and particle size BODIPY-FL maleimide ( $\sim$ 24  $\mu$ s), BODIPY-FL iodoacetamide  
665 ( $\sim$ 22  $\mu$ s) and TAMRA DIBO ( $\sim$ 37  $\mu$ s) was measured for each session (**Fig. S11I**). FCS measurement  
666 for each GFP tagged Cavin protein was then done for 10 s and repeated 10 times with a binning time  
667 of 200 ns. FCS measurements showing presence of aggregates were removed from analysis. The  
668 autocorrelation function  $G(\tau)$  was fitted using a predefined isotropic 3D translational diffusion  $G_d(\tau)$   
669 model from the ConFoCor model tool with fixed amplitude (A) and structural parameter,  $G(\tau) = 1 +$   
670  $A * G_d(\tau)$ . The diffusion coefficient or diffusivity ( $\mu$ s<sup>2</sup>Sec<sup>-1</sup>) for each measurement was exported from  
671 the Zeiss analysis program and plotted for all constructs in Graph pad Prism software. Hydrodynamic  
672 radius calculations were done using Stokes-Einstein equation with basic assumption of perfect  
673 spherical object diffusion. Stokes – Einstein equation;  $D = K_B T / 6\pi\eta r$ , Where,  $K_B$  – Boltzmann  
674 constant, T – Temperature (298K),  $\pi$  – pi (3.14),  $\eta$  – dynamic viscosity (Pa.S) and r – hydrodynamic  
675 (Stokes) radius of spherical particle.

676

## 677 **In vitro phase separation assays**

678 Purified GFP-tagged Cavin1 proteins, or mixtures of mCherry-CAV1 and GFP-Cavin1 proteins, were  
679 diluted to respective protein and/or salt concentrations prior to addition of dextran T-500 (Pharmacia).  
680 Dextran solution was added on the top of protein solution without any mixing to allow natural  
681 diffusion of dextran. Image acquisition and fluorescence recovery after photobleaching (FRAP)  
682 assays were performed after 2 min wait period to allow phase separated droplets to settle. Phase  
683 separation analysis was done within 10 min post addition of dextran. Non-bleaching image  
684 acquisition conditions were established before performing FRAP assay. FRAP analysis was done by  
685 bleaching rectangular area (2  $\mu$ m X 1  $\mu$ m approximately) within protein droplet using 488 nm Argon  
686 laser and subsequent image acquisition was done one frame per second. Recovery curves from  
687 different proteins were normalised without acquisition bleaching correction using formula  $[F_{(T)} -$   
688  $F_{(\text{postbleach}T=0)}] / [F_{(\text{Prebleach})} - F_{(\text{postbleach}T=0)}]$ . Normalised data points were used to perform non-linear

689 exponential recovery fit using equations within ImageJ 1.50g or Prism version 8 to obtain half-life  
690 value for fluorescence recovery of respective protein.

691

### 692 **Liposome preparation and in vitro membrane tubulation assay**

693 Liposomes were prepared by mixing of 10  $\mu$ L 10 mM stock solution of Folch lipids (bovine brain  
694 extract lipid - Folch I fraction Sigma Aldrich B1502) with 50  $\mu$ L chloroform in a round-bottom flask.  
695 The mixtures were dried gently by a stream of nitrogen first and under vacuum overnight thereafter.  
696 Liposomes were rehydrated in 500  $\mu$ L 150GF buffer followed by repetitive freeze-thaw cycles for 3  
697 – 5 times, using first a mixture of dry ice and acetone followed with 60°C water. The liposomes were  
698 then extruded through a 400-nm polycarbonate membrane 21 times using an Avanti mini-extruder to  
699 generate large unilamellar lipid vesicles (LUVs).

700 A 5  $\mu$ l volume of purified Cavin1 variants [ $\sim$  0.1 mg/ml (1.5 – 2  $\mu$ M)] was mixed with 5  $\mu$ l  
701 200  $\mu$ M liposomes for 1 – 3 min at room temperature. Samples were then quickly spotted onto  
702 formvar-carbon coated electron microscopy grids (Cu/Pd grids 200 mesh hexagonal – ProSciTech -  
703 GCU-PD200H) for 10 s and excess samples were removed by blotting at corner using Whatman filter  
704 paper. This is followed by 2 - 3 distilled water washes in similar fashion and subsequent application  
705 of 1% uranyl acetate stain. The excess of stain was removed by blotting and grids were allowed to air  
706 dry for a while before viewing under the electron microscope. Final images were acquired on JEOL  
707 1011 electron microscope at 80 kV.

708

### 709 **Giant multilamellar vesicle (GMV) experiments**

710 Giant multilamellar vesicles (GMV) were prepared using electro-formation method described  
711 before<sup>90</sup>. Briefly, lipids mixture dissolved in chloroform / methanol solution was gently applied to  
712 indium-tin-oxide coated glass slide (Sigma Aldrich Cat. No. 636908) as multiple layers. This solution  
713 was then dried under constant stream of nitrogen to remove organic solvent and further dried under  
714 vacuum overnight. Next day, electro-formation was performed at 50°C in 150GF buffer for 1 hr.  
715 Vesicles were used immediately for experiments.

716

### 717 **Cryoelectron microscopy / tomography of Cavin1 coated membrane tubules**

718 Liposome tubulation reaction was assembled as described in the previous section and subjected to  
719 vitrification after a 1 – 3 min incubation period. For vitrification, the sample was applied to Lacey  
720 carbon grids (EMS, Hatfield, PA, USA) using a Vitrobot Mark II (FEI, Eindhoven, NL) plunge freezer  
721 with 4  $\mu$ l of sample, 6 s blotting time and a -3 mm offset at 24°C and 100% humidity. Images were  
722 collected on a Tecnai G2 F30 TEM (FEI, Eindhoven, NL) operated at 300 kV at a magnification of  
723 12,000X with 5  $\mu$ m defocus. Images were recorded on a Gatan K2 summit camera in counting mode

724 for a final pixel size of 3.556 Å per pixel. Images were processed in either IMOD (version 4.9) or  
725 ImageJ.

726 Tilt-series were acquired on a Talos Arctica TEM (Thermo Fisher Scientific-FEI, Eindhoven,  
727 NL) operated at 200 kV and at a magnification of 45,000x (final pixel size 3.11 Å per pixel). Images  
728 were recorded using the microscope software Tomography (Thermo Fisher Scientific-FEI, NL) on  
729 Falcon 3 (Thermo Fisher Scientific-FEI, NL) camera operated in counting mode at an angular range  
730 of  $-60^{\circ}$  to  $60^{\circ}$  in a bidirectional fashion and at an angular increment of  $2^{\circ}$ . The defocus was set to  $-5$   
731  $\mu\text{m}$ . Unbinned movies of 8 frames with a set dose rate of  $\sim 1.7 \text{ e}/\text{Å}^2$  were acquired and tomographic  
732 reconstructions were generated using the weighted back-projection method in IMOD  
733 (<https://bio3d.colorado.edu/imod/> version 4.9).

734

### 735 **Electron microscopy processing of PC3 cells**

736 PC3 cells were plated onto 30 mm tissue culture dishes and allowed to adhere to dishes for 48 h prior  
737 to transfection. Cells were then co-transfected with APEX-GBP and respective cavin1 mutant  
738 constructs. 24 h post transfection, cells were fixed with 2.5% glutaraldehyde in 0.1 M sodium  
739 cacodylate buffer (cacodylate) (pH7.4) for 1 h. DAB (3,3'-diaminobenzidine tetrahydrochloride,  
740 Sigma-Aldrich Cat. No. D5905) reaction was then performed as follows. Briefly, cells were washed  
741 with DAB/cacodylate mixture (DAB final concentration – 1 mg/ml) for 2 mins, then treated with  
742 DAB/cacodylate + 5.88 mM  $\text{H}_2\text{O}_2$  (hydrogen peroxide, Sigma-Aldrich Cat. No. H1009) for 20 mins.  
743 Cells were then washed with 0.1 M sodium cacodylate buffer and contrasted with 1% osmium  
744 tetroxide for 2 mins. Cells were then embedded in LX112 resin and thin sections were cut as described  
745 previously<sup>61</sup>. Images were acquired on JEOL 1011 electron microscope fitted with a Morada CCD  
746 camera (Olympus) under the control of iTEM software and operated at 80kV.

747

### 748 **Immunofluorescence analysis, live cell imaging and Proximity ligation assay (PLA)**

749 PC3 cells were grown at about  $\sim 50\%$  confluency in RPMI 1640 medium supplemented with 10%  
750 FBS. Cells were then transfected with respective Cavin1 mutants using Lipofectamine 3000  
751 (Invitrogen) as per manufacturer's instructions. Cells were fixed 24 h post transfection with 4%  
752 paraformaldehyde in phosphate-buffered saline (PBS) at  $4^{\circ}\text{C}$  and subsequently permeabilised with  
753 0.1% Triton X-100 in PBS for 7 mins. Cells were probed with CAV1 antibody (Dilution 1:600) and  
754 anti-Rabbit secondary antibody Alexa Fluor® 561 conjugate (Dilution 1:400). For Transferrin uptake  
755 assays, PC3 cells expressing either GFP-Cavin1 or GFP-Cavin1- $\Delta\text{DR1}$  were incubated with  
756 transferrin labelled with Alexa-488 ( $5 \mu\text{g}/\text{ml}$ ) for 1h at  $37^{\circ}\text{C}$ . Cells were then washed three times  
757 with ice cold PBS and cell were subsequently fixed with 4% paraformaldehyde in PBS for all  
758 experiments except live imaging. Cholesterol addition experiments were performed in MCF7 cells



759 expressing GFP tagged Cavin1 with serum starvation (Serum free DMEM + 1% BSA, 1h) prior to  
760 the addition of water soluble analog of Cholesterol (Sigma-Aldrich Cat. No. C4951). Cells were  
761 incubated in DMEM media containing Cholesterol for 40 min at 37°C with immediate fixation using  
762 4% paraformaldehyde in phosphate-buffered saline (PBS) at room temperature. Confocal images  
763 (1024X1024) were acquired on Zeiss inverted LSM 880 coupled with fast airyscan detector (Carl  
764 Zeiss, Inc) equipped with 63X oil immersion objective, NA 1.4. Images were acquired at different  
765 laser power for GFP tagged truncation mutants and detector gain settings in order to avoid  
766 oversaturation of pixels. All images were processed for brightness/contrast (histogram) adjustment  
767 for visualisation using ImageJ. For live cell imaging and FRAP analysis, cells were plated on glass  
768 bottom (No. 1.5) petri dishes (ibidi) and allowed to grown at about ~70% confluency and transfected  
769 with respective Cavin1 mutants. For bleaching, 488 nm laser at 100% attenuation power was used  
770 for 20 iterations and subsequent imaging was done at one frame per second. Airyscan processing was  
771 done automatically in Zeiss software (ZEN 2.3). For PLA, PC3 cells were processed as described  
772 previously<sup>10</sup>. Images were then acquired on Zeiss LSM 710 and LSM 880 confocal microscope (Carl  
773 Zeiss, Inc) equipped with 63X oil immersion objective and quantitation of PLA dots per cell was  
774 performed using find maxima function in ImageJ with offset of 25. For quantitative co-localization,  
775 images (1024X1024) were acquired on Zeiss inverted LSM 880 in confocal mode and Pearson's  
776 coefficient calculation was done using colo2 macro using imageJ ([https://imagej.net/Coloc\\_2](https://imagej.net/Coloc_2)),

777

### 778 **Constructing a structural model of mouse Cavin1**

779 A structural model of mouse Cavin1 was built manually based both on known structures of the mouse  
780 Cavin1 HR1 domain<sup>11</sup> (PDB ID 4QKV), the previous model of the Cavin1 undecad UC1 region<sup>10</sup>,  
781 and secondary structure prediction of the Cavin1 protein carefully cross-referenced to several Cavin1  
782 homologues and other Cavin family members<sup>11</sup>. Based on the homotrimeric coiled-coil structure of  
783 the HR1 domain we constructed our model under the assumption that a single Cavin1 complex would  
784 consist of three separate Cavin1 chains. The secondary structure predictions and previous crystal  
785 structure led us to define the following regions of Cavin1 as either  $\alpha$ -helical or random-coil; DR1,  
786 residues 1-48, random-coil; HR1, residues 49-147,  $\alpha$ -helical (based on PDB 4QKV of mouse Cavin1  
787 HR1); DR2, residues 148-218, random-coil; HR2,  $\alpha$ -helical for residues 219-242, random-coil for  
788 residues 243-244,  $\alpha$ -helical for residues 245-278 (model from<sup>10</sup>), random-coil for residues 279-286,  
789  $\alpha$ -helical for residues 287-297; DR3, residues 298-392, random coil. Stretches of random-coil were  
790 built and added to  $\alpha$ -helical domains manually in COOT Version 0.8.2<sup>91</sup>, and the final model was  
791 subjected to simple geometry regularisation in PHENIX Version 1.14<sup>92</sup>. Structural images and  
792 electrostatic surface representations were rendered with PYMOL Version 2.3.1.

793

794 **Statistical analyses**

795 Statistical analysis and P value calculations were performed by one-way ANOVA using graph pad  
796 Prism software.

797

798

799 **Acknowledgements**

800 This work was supported by grants from the National Health and Medical Research Council of  
801 Australia (NHMRC) (to RGP grant number APP569542 and APP1037320) and the Australian  
802 Research Council (ARC) (to BMC, grant number DP120101298). RGP is supported by an NHMRC  
803 Senior Principal Research Fellowship from the NHMRC (APP1058565) and by the Australian  
804 Research Council Centre of Excellence in Convergent Bio-Nano Science and Technology (R.G.  
805 Parton). BMC is supported by an NHMRC Senior Research Fellowship (APP1136021). Confocal  
806 microscopy was performed at the Australian Cancer Research Foundation (ACRF)/Institute for  
807 Molecular Bioscience (IMB) Dynamic Imaging Facility for Cancer Biology, established with funding  
808 from the ACRF. The authors acknowledge the use of the Cryo Electron Microscopy Facility through  
809 the Victor Chang Innovation Centre, funded by the NSW government, and the Electron Microscope  
810 Unit within the Mark Wainwright Analytical Centre at UNSW Sydney.

811

812 **Author contributions**

813 BMC and RGP conceived the project, study and acquired funding. VT performed molecular cloning,  
814 in vitro protein purification, in vitro, cellular assays, live imaging and FCS experiments. GY assisted  
815 in molecular cloning and in vitro protein purification. KAM assisted in cellular and phase separation  
816 assay. OK performed preliminary FCS analysis of cavins in the eukaryotic *Leishmania terentolae* cell  
817 free lysate system. NC initiated cholesterol addition experiments completed by VT. JR performed  
818 transferrin uptake assay, cellular processing for electron microscopy and electron microscopy image  
819 acquisition. NA and MF performed tomography data acquisition, and trained VT in cryo-EM  
820 methods. All authors commented on the manuscript. VT, RGP and BMC wrote the manuscript.

821

822 **Conflict of interest**

823 Authors declare that they have no conflict of interest.

824

825 **Data availability**

826 Source data for Figs. 1, 2, 6, and 7 are provided in Table S1. The data that support the findings of this  
827 study are available from the corresponding author on request.

828

829

830

831 **References**

832

- 833 1. Lamaze, C., Tardif, N., Dewulf, M., Vassilopoulos, S. & Blouin, C.M. The caveolae dress  
834 code: structure and signaling. *Current Opinion in Cell Biology* **47**, 117-125 (2017).
- 835 2. Parton, R.G. & del Pozo, M.A. Caveolae as plasma membrane sensors, protectors and  
836 organizers. *Nature reviews. Molecular cell biology* **14**, 98-112 (2013).
- 837 3. Parton, R.G. Caveolae: Structure, Function, and Relationship to Disease. *Annual Review of*  
838 *Cell and Developmental Biology* **34**, 111-136 (2018).
- 839 4. Hayer, A., Stoeber, M., Bissig, C. & Helenius, A. Biogenesis of caveolae: stepwise assembly  
840 of large caveolin and cavin complexes. *Traffic* **11**, 361-382 (2010).
- 841 5. Ariotti, N. *et al.* Molecular Characterization of Caveolin-induced Membrane Curvature. *J Biol*  
842 *Chem* **290**, 24875-24890 (2015).
- 843 6. Busija, A.R., Patel, H.H. & Insel, P.A. Caveolins and cavins in the trafficking, maturation,  
844 and degradation of caveolae: implications for cell physiology. *Am J Physiol Cell Physiol* **312**,  
845 C459-C477 (2017).
- 846 7. Hill, M.M. *et al.* PTRF-Cavin, a conserved cytoplasmic protein required for caveola formation  
847 and function. *Cell* **132**, 113-124 (2008).
- 848 8. Walser, P.J. *et al.* Constitutive formation of caveolae in a bacterium. *Cell* **150**, 752-763  
849 (2012).
- 850 9. Bastiani, M. *et al.* MURC/Cavin-4 and cavin family members form tissue-specific caveolar  
851 complexes. *The Journal of cell biology* **185**, 1259-1273 (2009).
- 852 10. Tillu, V.A. *et al.* A variable undecad repeat domain in cavin1 regulates caveola formation and  
853 stability. *EMBO reports* **19**, e45775 (2018).
- 854 11. Kovtun, O. *et al.* Structural insights into the organization of the cavin membrane coat  
855 complex. *Developmental cell* **31**, 405-419 (2014).
- 856 12. Kovtun, O., Tillu, V.A., Ariotti, N., Parton, R.G. & Collins, B.M. Cavin family proteins and  
857 the assembly of caveolae. *Journal of Cell Science* **128**, 1269-1278 (2015).
- 858 13. Mohan, J., Moren, B., Larsson, E., Holst, M. & Lundmark, R. Cavin3 interacts with cavin1  
859 and caveolin1 to increase surface dynamics of caveolae. *J Cell Sci* (2015).
- 860 14. Gambin, Y. *et al.* Single-molecule analysis reveals self assembly and nanoscale segregation  
861 of two distinct cavin subcomplexes on caveolae. *eLife* **3**, e01434 (2014).
- 862 15. Oates, M.E. *et al.* D2P2: database of disordered protein predictions. *Nucleic Acids Research*  
863 **41**, D508-D516 (2012).
- 864 16. Banks, D.S. & Fradin, C. Anomalous diffusion of proteins due to molecular crowding.  
865 *Biophys J* **89**, 2960-2971 (2005).
- 866 17. Lavie, Y., Fiucci, G. & Liscovitch, M. Up-regulation of caveolae and caveolar constituents in  
867 multidrug-resistant cancer cells. *J Biol Chem* **273**, 32380-32383 (1998).

- 868 18. Tillu, V.A., Kovtun, O., McMahon, K.A., Collins, B.M. & Parton, R.G. A phosphoinositide-  
869 binding cluster in cavin1 acts as a molecular sensor for cavin1 degradation. *Mol Biol Cell* **26**,  
870 3561-3569 (2015).
- 871 19. Boeynaems, S. *et al.* Protein Phase Separation: A New Phase in Cell Biology. *Trends Cell*  
872 *Biol* **28**, 420-435 (2018).
- 873 20. Boyko, S., Qi, X., Chen, T.H., Surewicz, K. & Surewicz, W.K. Liquid-liquid phase separation  
874 of tau protein: The crucial role of electrostatic interactions. *J Biol Chem* **294**, 11054-11059  
875 (2019).
- 876 21. Gomes, E. & Shorter, J. The molecular language of membraneless organelles. *J Biol Chem*  
877 **294**, 7115-7127 (2019).
- 878 22. Wang, J. *et al.* A Molecular Grammar Governing the Driving Forces for Phase Separation of  
879 Prion-like RNA Binding Proteins. *Cell* **174**, 688-699 e616 (2018).
- 880 23. Alenquer, M. *et al.* Influenza A virus ribonucleoproteins form liquid organelles at  
881 endoplasmic reticulum exit sites. *Nat Commun* **10**, 1629 (2019).
- 882 24. Case, L.B., Zhang, X., Ditlev, J.A. & Rosen, M.K. Stoichiometry controls activity of phase-  
883 separated clusters of actin signaling proteins. *Science* **363**, 1093-1097 (2019).
- 884 25. Ditlev, J.A. *et al.* A composition-dependent molecular clutch between T cell signaling  
885 condensates and actin. *eLife* **8** (2019).
- 886 26. Huang, W.Y.C. *et al.* A molecular assembly phase transition and kinetic proofreading  
887 modulate Ras activation by SOS. *Science* **363**, 1098-1103 (2019).
- 888 27. Johnson, A. *et al.* TFG clusters COPII-coated transport carriers and promotes early secretory  
889 pathway organization. *EMBO J* **34**, 811-827 (2015).
- 890 28. Liao, Y.C. *et al.* RNA Granules Hitchhike on Lysosomes for Long-Distance Transport, Using  
891 Annexin A11 as a Molecular Tether. *Cell* **179**, 147-164 e120 (2019).
- 892 29. Ma, W. & Mayr, C. A Membraneless Organelle Associated with the Endoplasmic Reticulum  
893 Enables 3'UTR-Mediated Protein-Protein Interactions. *Cell* **175**, 1492-1506 e1419 (2018).
- 894 30. Milovanovic, D., Wu, Y., Bian, X. & De Camilli, P. A liquid phase of synapsin and lipid  
895 vesicles. *Science* **361**, 604-607 (2018).
- 896 31. Snead, W.T. & Gladfelter, A.S. The Control Centers of Biomolecular Phase Separation: How  
897 Membrane Surfaces, PTMs, and Active Processes Regulate Condensation. *Mol Cell* **76**, 295-  
898 305 (2019).
- 899 32. Zappa, F. *et al.* The TRAPP complex mediates secretion arrest induced by stress granule  
900 assembly. *EMBO J* **38**, e101704 (2019).
- 901 33. Beutel, O., Maraspini, R., Pombo-García, K., Martin-Lemaitre, C. & Honigsmann, A. Phase  
902 Separation of Zonula Occludens Proteins Drives Formation of Tight Junctions. *Cell* **179**, 923-  
903 936.e911 (2019).
- 904 34. Schwayer, C. *et al.* Mechanosensation of Tight Junctions Depends on ZO-1 Phase Separation  
905 and Flow. *Cell* **179**, 937-952.e918 (2019).

- 906 35. Bergeron-Sandoval, L.P. & Michnick, S.W. Mechanics, Structure and Function of  
907 Biopolymer Condensates. *J Mol Biol* **430**, 4754-4761 (2018).
- 908 36. Lacy, M.M., Ma, R., Ravindra, N.G. & Berro, J. Molecular mechanisms of force production  
909 in clathrin-mediated endocytosis. *FEBS Lett* **592**, 3586-3605 (2018).
- 910 37. Bergeron-Sandoval, L.-P. *et al.* Endocytosis caused by liquid-liquid phase separation of  
911 proteins. *bioRxiv* **145664** (2017).
- 912 38. Li, Y., Lipowsky, R. & Dimova, R. Membrane nanotubes induced by aqueous phase  
913 separation and stabilized by spontaneous curvature. *Proc Natl Acad Sci USA* **108**, 4731-4736  
914 (2011).
- 915 39. Alberti, S. *et al.* A User's Guide for Phase Separation Assays with Purified Proteins. *J Mol*  
916 *Biol* **430**, 4806-4820 (2018).
- 917 40. Wang, Z., Zhang, G. & Zhang, H. Protocol for analyzing protein liquid-liquid phase  
918 separation. *Biophysics Reports* **5**, 1-9 (2019).
- 919 41. Itzhak, D.N., Tyanova, S., Cox, J. & Borner, G.H. Global, quantitative and dynamic mapping  
920 of protein subcellular localization. *eLife* **5** (2016).
- 921 42. Molliex, A. *et al.* Phase separation by low complexity domains promotes stress granule  
922 assembly and drives pathological fibrillization. *Cell* **163**, 123-133 (2015).
- 923 43. Alberti, S., Gladfelter, A. & Mittag, T. Considerations and Challenges in Studying Liquid-  
924 Liquid Phase Separation and Biomolecular Condensates. *Cell* **176**, 419-434 (2019).
- 925 44. Kubala, M.H., Kovtun, O., Alexandrov, K. & Collins, B.M. Structural and thermodynamic  
926 analysis of the GFP:GFP-nanobody complex. *Protein Sci* **19**, 2389-2401 (2010).
- 927 45. Dewulf, M. *et al.* Dystrophy-associated caveolin-3 mutations reveal that caveolae couple  
928 IL6/STAT3 signaling with mechanosensing in human muscle cells. *Nature Communications*  
929 **10**, 1974 (2019).
- 930 46. Hayer, A. *et al.* Caveolin-1 is ubiquitinated and targeted to intraluminal vesicles in  
931 endolysosomes for degradation. *The Journal of cell biology* **191**, 615-629 (2010).
- 932 47. Hernandez-Deviez, D.J. *et al.* Aberrant dysferlin trafficking in cells lacking caveolin or  
933 expressing dystrophy mutants of caveolin-3. *Hum Mol Genet* **15**, 129-142 (2006).
- 934 48. Sun, X.H. *et al.* A conserved sequence in caveolin-1 is both necessary and sufficient for  
935 caveolin polarity and cell directional migration. *FEBS Lett* **583**, 3681-3689 (2009).
- 936 49. Kirkham, M. *et al.* Evolutionary analysis and molecular dissection of caveola biogenesis. *J*  
937 *Cell Sci* **121**, 2075-2086 (2008).
- 938 50. Sun, X.H. *et al.* Identification of a novel domain at the N terminus of caveolin-1 that controls  
939 rear polarization of the protein and caveolae formation. *J Biol Chem* **282**, 7232-7241 (2007).
- 940 51. Ingelmo-Torres, M. *et al.* Hydrophobic and basic domains target proteins to lipid droplets.  
941 *Traffic* **10**, 1785-1801 (2009).
- 942 52. Rothberg, K.G. *et al.* Caveolin, a protein component of caveolae membrane coats. *Cell* **68**,  
943 673-682 (1992).

- 944 53. Shaul, P.W. & Anderson, R.G. Role of plasmalemmal caveolae in signal transduction. *Am J*  
945 *Physiol* **275**, L843-851 (1998).
- 946 54. Ludwig, A. *et al.* Molecular composition and ultrastructure of the caveolar coat complex.  
947 *PLoS Biol* **11**, e1001640 (2013).
- 948 55. Ludwig, A., Nichols, B.J. & Sandin, S. Architecture of the caveolar coat complex. *J Cell Sci*  
949 **129**, 3077-3083 (2016).
- 950 56. Stoeber, M. *et al.* Model for the architecture of caveolae based on a flexible, net-like assembly  
951 of Cavin1 and Caveolin discs. *Proc Natl Acad Sci U S A* **113**, E8069-E8078 (2016).
- 952 57. Snead, W.T. *et al.* BAR scaffolds drive membrane fission by crowding disordered domains.  
953 *The Journal of cell biology* **218**, 664-682 (2019).
- 954 58. Wang, S., Zhao, Z. & Rodal, A.A. Higher-order assembly of Sorting Nexin 16 controls  
955 tubulation and distribution of neuronal endosomes. *The Journal of cell biology* **218**, 2600  
956 (2019).
- 957 59. Khater, I.M., Meng, F., Wong, T.H., Nabi, I.R. & Hamarneh, G. Super Resolution Network  
958 Analysis Defines the Molecular Architecture of Caveolae and Caveolin-1 Scaffolds. *Scientific*  
959 *Reports* **8**, 9009 (2018).
- 960 60. Liu, L. & Pilch, P.F. A critical role of cavin (polymerase I and transcript release factor) in  
961 caveolae formation and organization. *J Biol Chem* **283**, 4314-4322 (2008).
- 962 61. Ariotti, N. *et al.* Modular Detection of GFP-Labeled Proteins for Rapid Screening by Electron  
963 Microscopy in Cells and Organisms. *Developmental cell* **35**, 513-525 (2015).
- 964 62. Hetmanski, J.H.R. *et al.* Membrane Tension Orchestrates Rear Retraction in Matrix-Directed  
965 Cell Migration. *Developmental cell* (2019).
- 966 63. Pelkmans, L. & Zerial, M. Kinase-regulated quantal assemblies and kiss-and-run recycling of  
967 caveolae. *Nature* **436**, 128 (2005).
- 968 64. Siahaan, V. *et al.* Kinetically distinct phases of tau on microtubules regulate kinesin motors  
969 and severing enzymes. *Nat Cell Biol* **21**, 1086-1092 (2019).
- 970 65. Tan, R. *et al.* Microtubules gate tau condensation to spatially regulate microtubule functions.  
971 *Nat Cell Biol* **21**, 1078-1085 (2019).
- 972 66. Drechsler, H., Xu, Y., Geyer, V.F., Zhang, Y. & Diez, S. Multivalent electrostatic  
973 microtubule-interactions of synthetic peptides are sufficient to mimic advanced MAP-like  
974 behaviour. *Mol Biol Cell*, mbcE19050247 (2019).
- 975 67. Das, S., Eisen, A., Lin, Y.-H. & Chan, H.S. A Lattice Model of Charge-Pattern-Dependent  
976 Polyampholyte Phase Separation. *The Journal of Physical Chemistry B* **122**, 5418-5431  
977 (2018).
- 978 68. Borgia, A. *et al.* Extreme disorder in an ultrahigh-affinity protein complex. *Nature* **555**, 61-  
979 66 (2018).
- 980 69. Lin, Y.-H., Forman-Kay, J.D. & Chan, H.S. Sequence-Specific Polyampholyte Phase  
981 Separation in Membraneless Organelles. *Physical Review Letters* **117**, 178101 (2016).

- 982 70. Lin, Y.-H., Forman-Kay, J.D. & Chan, H.S. Theories for Sequence-Dependent Phase  
983 Behaviors of Biomolecular Condensates. *Biochemistry* **57**, 2499-2508 (2018).
- 984 71. Feng, H., Zhou, B.R. & Bai, Y. Binding Affinity and Function of the Extremely Disordered  
985 Protein Complex Containing Human Linker Histone H1.0 and Its Chaperone ProTalpha.  
986 *Biochemistry* **57**, 6645-6648 (2018).
- 987 72. Pak, C.W. *et al.* Sequence Determinants of Intracellular Phase Separation by Complex  
988 Coacervation of a Disordered Protein. *Mol Cell* **63**, 72-85 (2016).
- 989 73. Zeno, W.F. *et al.* Synergy between intrinsically disordered domains and structured proteins  
990 amplifies membrane curvature sensing. *Nat Commun* **9**, 4152 (2018).
- 991 74. Zeno, W.F. *et al.* Molecular Mechanisms of Membrane Curvature Sensing by a Disordered  
992 Protein. *J Am Chem Soc* **141**, 10361-10371 (2019).
- 993 75. Busch, D.J. *et al.* Intrinsically disordered proteins drive membrane curvature. *Nature*  
994 *Communications* **6**, 7875 (2015).
- 995 76. Yoo, H., Triandafillou, C. & Drummond, D.A. Cellular sensing by phase separation: Using  
996 the process, not just the products. *J Biol Chem* **294**, 7151-7159 (2019).
- 997 77. Aoki, T., Hagiwara, H., Matsuzaki, T., Suzuki, T. & Takata, K. Internalization of caveolae  
998 and their relationship with endosomes in cultured human and mouse endothelial cells. *Anat*  
999 *Sci Int* **82**, 82-97 (2007).
- 1000 78. Boucrot, E., Howes, M.T., Kirchhausen, T. & Parton, R.G. Redistribution of caveolae during  
1001 mitosis. *J Cell Sci* **124**, 1965-1972 (2011).
- 1002 79. Jung, W. *et al.* Cell-free formation and interactome analysis of caveolae. *The Journal of cell*  
1003 *biology* **217**, 2141-2165 (2018).
- 1004 80. Pelkmans, L., Burli, T., Zerial, M. & Helenius, A. Caveolin-stabilized membrane domains as  
1005 multifunctional transport and sorting devices in endocytic membrane traffic. *Cell* **118**, 767-  
1006 780 (2004).
- 1007 81. Shvets, E., Bitsikas, V., Howard, G., Hansen, C.G. & Nichols, B.J. Dynamic caveolae exclude  
1008 bulk membrane proteins and are required for sorting of excess glycosphingolipids. *Nat*  
1009 *Commun* **6**, 6867 (2015).
- 1010 82. Murray, D.H. *et al.* An endosomal tether undergoes an entropic collapse to bring vesicles  
1011 together. *Nature* **537**, 107-111 (2016).
- 1012 83. Miskei, M. *et al.* Fuzziness enables context dependence of protein interactions. *FEBS Lett*  
1013 **591**, 2682-2695 (2017).
- 1014 84. Olsen, J.G., Teilum, K. & Kragelund, B.B. Behaviour of intrinsically disordered proteins in  
1015 protein-protein complexes with an emphasis on fuzziness. *Cell Mol Life Sci* **74**, 3175-3183  
1016 (2017).
- 1017 85. Tompa, P. & Fuxreiter, M. Fuzzy complexes: polymorphism and structural disorder in  
1018 protein-protein interactions. *Trends Biochem Sci* **33**, 2-8 (2008).



- 1019 86. Richter, T. *et al.* High-resolution 3D quantitative analysis of caveolar ultrastructure and  
1020 caveola-cytoskeleton interactions. *Traffic* **9**, 893-909 (2008).
- 1021 87. Catanzariti, A.M., Soboleva, T.A., Jans, D.A., Board, P.G. & Baker, R.T. An efficient system  
1022 for high-level expression and easy purification of authentic recombinant proteins. *Protein*  
1023 *Science* **13**, 1331-1339 (2004).
- 1024 88. Berrow, N.S. *et al.* A versatile ligation-independent cloning method suitable for high-  
1025 throughput expression screening applications. *Nucleic Acids Research* **35**, e45-e45 (2007).
- 1026 89. Aboulaich, N., Vainonen, J.P., Stralfors, P. & Vener, A.V. Vectorial proteomics reveal  
1027 targeting, phosphorylation and specific fragmentation of polymerase I and transcript release  
1028 factor (PTRF) at the surface of caveolae in human adipocytes. *The Biochemical journal* **383**,  
1029 237-248 (2004).
- 1030 90. Angelova, M.I. & Dimitrov, D.S. Liposome electroformation. *Faraday Discussions of the*  
1031 *Chemical Society* **81**, 303-311 (1986).
- 1032 91. Emsley, P. & Cowtan, K. Coot: model-building tools for molecular graphics. *Acta Crystallogr*  
1033 *D Biol Crystallogr* **60**, 2126-2132 (2004).
- 1034 92. Adams, P.D. *et al.* PHENIX: a comprehensive Python-based system for macromolecular  
1035 structure solution. *Acta Crystallogr D Biol Crystallogr* **66**, 213-221 (2010).
- 1036 93. Simossis, V.A. & Heringa, J. PRALINE: a multiple sequence alignment toolbox that  
1037 integrates homology-extended and secondary structure information. *Nucleic Acids Res* **33**,  
1038 W289-294 (2005).
- 1039
- 1040
- 1041

1042 **Figure Legends**

1043 **Figure 1. The Cavin1 N- and C-terminal DR domains are important for self-association into**  
1044 **oligomers.**

1045 **(A)** Schematic representation of Cavin1 and truncations. DR, disordered region; HR, helical region.  
1046 **(B)** The diffusion rate of Cavin1, Cavin1- $\Delta$ DR1 and Cavin1- $\Delta$ DR3 in solution assessed by  
1047 fluorescence correlation spectroscopy (FCS). Bacterially expressed and purified ubiquitin and GFP  
1048 tagged proteins (**Fig. S2**) were analysed in high NaCl concentration (500 mM) and physiological  
1049 NaCl concentration (150 mM). Error bars indicate mean  $\pm$  SD (standard deviation), N=2, n=10-15,  
1050 ns – not significant, \*P<0.05 \*\*\*P<0.001. **(C)** The diffusion rate of GFP-tagged Cavin1, Cavin1-  
1051  $\Delta$ DR1 and Cavin1- $\Delta$ DR3 in lysates after expression in MCF7 cells (lacking endogenous Cavins and  
1052 Caveolins). Buffer contained 150 mM NaCl. N=3, n=20-25, ns – not significant, \*\*\*P<0.001. Error  
1053 bars indicate mean  $\pm$  SD.

1054  
1055 **Figure 2. Cavin1 undergoes liquid-liquid phase separation *in vitro*.**

1056 **(A)** Liquid-liquid phase separation (LLPS) assays with recombinant Ub- and GFP-tagged Cavin1,  
1057 Cavin1- $\Delta$ DR3 and Cavin1- $\Delta$ DR1 at different protein and salt concentrations. Scale bar = 10  $\mu$ m. **(B)**  
1058 Fluorescence recovery after photobleaching (FRAP) assay with Cavin1, Cavin1- $\Delta$ DR3 and Cavin1-  
1059  $\Delta$ DR1 showing GFP fluorescence images at increasing times. Scale bar = 5  $\mu$ m. **(C)** Plot of  
1060 normalized fluorescence intensity after photobleaching. N=6-8, Grey, blue and pink shaded areas  
1061 around recovery curves represent standard deviation (SD). While Cavin1 and Cavin1- $\Delta$ DR3 droplets  
1062 rapidly exchange with the bulk solution and recover their fluorescence, Cavin1- $\Delta$ DR1 shows virtually  
1063 no exchange indicating gel formation.

1064  
1065 **Figure 3. CAV1 N-terminus co-phase separates with Cavin1**

1066 **(A)** Schematic representation of CAV1 domain architecture and design of various domain / point  
1067 mutations. LLPS assays with MBP-GBP-CAV1 and cavin1 independently **(B)** and in mixture **(C)**.  
1068 MBP-GBP-CAV1 does not undergo LLPS in isolation but co-phase separates with Cavin1. **(D)** LLPS  
1069 assays with different CAV1 DR region mutations and GFP-Cavin1 or Cavin1- $\Delta$ DR3 or Cavin1- $\Delta$ DR1.  
1070 Scale bar – 10  $\mu$ m. Among all truncation mutations tested, only mCherry-CAV1 (1-100) was able to  
1071 co-phase separate with Cavin1. Among CAV1 DR point mutations (M1 to M5), mutants M1, M2 and  
1072 M4 were able to co-phase separate with GFP-Cavin1 while total charge inversion mutant M3 and  
1073 mutant M5 failed to co-phase separate highlighting the importance of charged residues in CAV1-  
1074 Cavin1 association.

1075  
1076 **Figure 4. The Cavin1 DR domains are required for membrane remodelling *in vitro*.**

1077 (A) Purified Ub-tagged full length Cavin1 was mixed with Folch 400 nm unilamellar liposomes and  
1078 analysed by both negative stain EM (1% uranyl acetate) and cryoEM. (B) Cryoelectron tomography  
1079 (CryoET) of Cavin1-coated membrane tubules showing bottom, middle and top sections of three-  
1080 dimensional projections. Striated protein densities are observed coating the relatively heterogeneous  
1081 membrane tubules. The full tomogram is shown in **Movie S1**. (C) Schematic diagram of Cavin1 and  
1082 different truncation constructs examined for their ability to remodel membranes *in vitro*. (D) Purified  
1083 Ub-tagged Cavin1 truncations were mixed with Folch 400 nm unilamellar liposomes and analysed  
1084 by negative stain EM (1% uranyl acetate). Full membrane tubulation and remodelling activity  
1085 requires residues 1-30 in DR1, and residues 330-345 in DR3. Scale bar = 500 nm.

1086

1087 **Figure 5. Removing the Cavin1 DR domains prevents deformation of GMV membranes.**

1088 (A) Purified Ub- and GFP-tagged Cavin1 shows strong localised clustering on the surface of Folch  
1089 giant multilamellar vesicles (GMV) containing Bodipy-TMR-labelled PI(4,5)P<sub>2</sub> (0.1 mol%). Cavin1  
1090 (B), Cavin1-ΔDR3 (C) or Cavin1-ΔDR1 (D) were incubated with Folch GMVs containing Bodipy-  
1091 TMR-labelled PI(4,5)P<sub>2</sub> (0.1 mol%), allowed to settle on glass coverslips and images were acquired  
1092 one frame per second. Frame numbers are indicated in PI(4,5)P<sub>2</sub> channel (red). (E) GMVs incubated  
1093 with Cavin1-ΔDR1 were often observed to be tethered to each other with Cavin1-ΔDR1 concentrated  
1094 at the contact sites. Scale bar = 10 μm.

1095

1096 **Figure 6. The Cavin1 DR domains are essential for caveola formation with CAV1.**

1097 (A) GFP-tagged Cavin1 and truncations (green) were expressed for 24 h in PC3 cells, fixed and  
1098 immunolabelled for Caveolin1 (CAV1) (red). Full length Cavin1 forms typical caveola puncta,  
1099 colocalising with CAV1 at the cell surface. Cavin1-ΔDR1 mutant expression leads to formation of  
1100 tethered intracellular CAV1-positive clusters. Cavin1-ΔDR3 shows cytoplasmic and microtubule  
1101 localisation. Images were collected using a Zeiss fast Airyscan microscope. Scale bar = 10 μm.  
1102 Fluorescence recovery after photobleaching (FRAP) analysis of GFP-Cavin1-ΔDR3 before (B) and  
1103 after (C) nocodazole (10 μM) addition. Scale bar – 5 μm (D) In PC3 cells GFP-tagged Cavin1-ΔDR1  
1104 truncation shows colocalization with the early endosomal marker (EEA1) (red) and CAV1 (blue).  
1105 Inset shows merge images of GFP-Cavin1-ΔDR1/EEA1 and GFP-Cavin1-ΔDR1/CAV1. Scale bar =  
1106 10 μm. (E) GFP-tagged Cavin1 and Cavin1-ΔDR1 were visualised in PC3 cells by electron  
1107 microscopy and labelling of GFP tagged proteins using APEX-GBP staining. Scale bar = 1 μm. (F)  
1108 Live imaging of PC3 cells expressing Rab5a-mCherry with either GFP-Cavin1 or GFP-Cavin1-  
1109 ΔDR1. Images were acquired one frame per four seconds and frame numbers are indicated in boxes.  
1110 Arrows indicate mCherry/GFP signal co-localisation or separation event.

1111

1112 **Figure 7. Definition of the minimal DR sequences required for Cavin1 function.**

1113 (A) GFP-tagged Cavin1 DR domain truncation mutants (green) (Fig. 4C) were expressed in PC3 cells  
1114 and immunolabelled with CAV1 (red). Residues 1-30 in DR1 and 330-345 are required for caveola  
1115 formation. Scale bar = 10  $\mu$ m. (B) APEX-GBP labelling of GFP tagged Cavin1(1-345) shows normal  
1116 bulb-shaped caveolae at the plasma membrane. (C) Proximity ligation assay (PLA) analyses show  
1117 that truncation of Cavin1 from the C-terminus beyond residue 345 results in loss of association with  
1118 CAV1. PLA signal was quantified as dots per cell for specific interaction between GFP-tagged  
1119 proteins and CAV1, N = 2 (independent biological replicates), n = 10-15 (cells per replicates), Error  
1120 bars indicate mean  $\pm$  SD, \*\*\* P<0.001.

1121

1122 **Figure 8. Sequence requirements of the Cavin1 DR domains in caveola assembly.**

1123 (A) Schematic diagram of Cavin1(1-345) with the sequences of the various point mutants indicated.  
1124 DR1, DR2 and DR3 mutations occur in the regions 1-30, 161-197 and 311-345 respectively. (B)  
1125 GFP-tagged Cavin1(1-345) DR1 domain mutants (green), (C) DR2 domain mutants and (D) DR3  
1126 domain mutants expressed in PC3 cells and immunolabelled with endogenous CAV1 (red). Images  
1127 in (B), (C) and (D) were by Airyscan confocal microscopy. Scale bar = 10  $\mu$ m. (E) FRAP analysis of  
1128 Cavin1 (1-345) DR3mut9 mutant showing fast recovery of fluorescence in cytosolic droplets and also  
1129 droplet fusion events (marked by arrow).

1130

1131 **Figure 9. Model for the role of Cavin1 DR domains in LLPS and caveola formation.**

1132 (A) Structural model of a Cavin1 homotrimeric assembly. The trimeric HR1 coiled-coil domain is  
1133 derived from the crystal structure of the mouse Cavin1 HR1 domain <sup>11</sup>, the UC1 and HR2 domains  
1134 are modelled as described previously <sup>10</sup>, and the DR domains are modelled as random coil structures  
1135 (see Methods for further details). The structure is shown in ribbon diagram (top) and with an  
1136 electrostatic surface representation (bottom). (B) Proposed orientation of Cavin1 proteins on the  
1137 membrane surface, with membrane-binding HR1 and HR2 domains associated with the phospholipid  
1138 bilayer and negatively charged DR sequences directed outwards due to electrostatic repulsion. (C)  
1139 Potential role of Cavin1 disordered sequences in membrane curvature generation due to steric  
1140 crowding. This concept is largely derived from previous studies of other membrane-associated  
1141 proteins <sup>73, 74</sup>. (D) Potential role of Cavin1 fuzzy interactions and LLPS in membrane curvature  
1142 generation, CAV1 interaction and caveola formation.

1143

1144

1145 **Supplementary Information**

1146 **Figure S1. Electrostatic charge distribution and sequence disorder in the Cavin family proteins.**

1147 **(A)** Protein charge plots of human (h) and zebrafish (z) cavin family proteins performed using the  
1148 Emboss Server (<http://www.bioinformatics.nl/cgi-bin/emboss/charge>) (using standard input  
1149 parameters and a window width of five amino acid residues). **(B)** The Cavin1 sequence was analysed  
1150 using the D2P2 web server <sup>15</sup> for predicted regions of disorder, and also known sites of post-  
1151 translational modifications.

1152

1153 **Figure S2. Schematic representation of protein expression constructs used in this study.**

1154

1155 **Figure S3. LLPS behaviour of Cavin1 expressed and purified from bacteria and mammalian**  
1156 **cells**

1157 **(A)** Liquid-liquid phase separation (LLPS) assay with bacterially expressed recombinant Ub- and  
1158 GFP-tagged Cavin1, at different protein and salt concentrations but in the absence of dextran or other  
1159 crowding agents. **(B)** At low concentrations, full length Cavin1 still forms liquid droplets, and  
1160 Cavin1- $\Delta$ DR1 still forms coacervates. Cavin1- $\Delta$ DR3 is less prone to LLPS at low concentrations  
1161 compared to the full-length protein. **(C)** LLPS assay performed with GFP tagged Cavin1- $\Delta$ DR1 by  
1162 addition of 1.25% dextran T-500. Fluorescent GFP signal and adjacent bright field image showing  
1163 transparent drops unlike non-specific precipitates that are usually non-transparent and milky or brown  
1164 in appearance. Scale bar – 10  $\mu$ m. **(D)** LLPS assay performed with Cavin1-GFP expressed and  
1165 purified from mammalian HEK293 cells. **(E)** MCF7 cell lysates expressing Cavin1-GFP with the  
1166 addition of 3% dextran T-500 in either 150 mM NaCl or 500 mM NaCl. Scale bar – 10  $\mu$ m. **(F)** LLPS  
1167 assay performed with purified E. coli cavins and GFP at higher dextran T-500 concentration (3%).

1168

1169 **Figure S4. Cavin1 undergoes LLPS and remodels cellular membranes devoid of CAV1.**

1170 **(A)** MCF7 cells expressing GFP-Cavin1 at varying amount of DNA showing cytosolic distribution.  
1171 **(B)** MCF7 cells expressing GFP-Cavin1, Cavin1- $\Delta$ DR1 showing cytosolic distribution and Cavin1-  
1172  $\Delta$ DR3 showing diffuse localisation (upper panel). **(C)** Addition of a water-soluble form of cholesterol  
1173 (1 mM added, with effective available cholesterol concentration  $\sim$ 40  $\mu$ M) to cells expressing GFP-  
1174 Cavin1, Cavin1- $\Delta$ DR1 and Cavin1- $\Delta$ DR3 promotes liquid like droplet formation, membrane  
1175 recruitment (upper panel) in some cells and tubulation in some cells for GFP-Cavin1 (lower panels).  
1176 Scale bar – 10  $\mu$ m. **(D)** MCF7 cells expressing GFP-Cavin1 with cholesterol addition formed GFP-  
1177 Cavin1 condensates that did not stain with Nile red suggesting these structures are not lipid droplets.  
1178 **(E)** GFP-Cavin1 and mCherry-CAAX co-expression in MCF7 cells before cholesterol addition  
1179 (upper panel) and after addition of cholesterol (lower panel) showing membrane patches and tubules

1180 partially co-localising with mCherry-CAAX. (F) CAV1<sup>-/-</sup> MEF cells expressing GFP-Cavin1 show  
1181 cytosolic distribution and addition of 1 mM cholesterol causes membrane recruitment of GFP-Cavin1  
1182 (left panels) also observed by ruthenium red labelling of membrane surface by EM. Scale bar – 1  $\mu$ m.  
1183

1184 **Figure S5. Co-phase separation of CAV1 with Cavin1.**

1185 (A) Amino acid sequence alignment of dog caveolin sequences showing non-conserved and  
1186 conserved fragments of N-terminal DR region, oligomerization and scaffolding domain (OD-CSD),  
1187 intramembrane domain (IMD) and C-terminal membrane binding domain. (B) Alignment of human  
1188 CAV1, CAV2 and CAV3 with secondary structure predictions performed using the Praline webserver  
1189 (<http://www.ibi.vu.nl/programs/pralinewww>)<sup>93</sup>. (C) In gel fluorescence images of gel filtration  
1190 fractions for respective mCherry-tagged CAV1 mutants. (D) LLPS assay with mCherry CAV1 (1-  
1191 30), (30-80), (1-80) and (1-100) and Cavin1. mCherry-CAV1 (1-100) is recruited to cavin1 droplets  
1192 and undergo LLPS.  
1193

1194 **Figure S6. Analysis of GFP-CAV1 mutants co-expressing Cavin1-mCherry in MCF7 cells.**

1195 GFP tagged CAV1 mutants (green) (Fig. 3) were co-expressed with Cavin1-mCherry in MCF7 cell  
1196 line (A) and fixed cells were immunolabelled for early endosomes (EEA1) (B), lysosomes (LAMP1)  
1197 (C), golgi membrane (GM130) (D), cellular actin (phalloidin) and Nile red (lipid droplets) (E) Scale  
1198 bar – 10  $\mu$ m  
1199

1200 **Figure S7. Cavin1 membrane interactions *in vitro***

1201 (A) *In vitro* membrane tubulation assay and negative stain electron microscopy was performed after  
1202 mixing Cavin1 and liposomes consisting of Phosphatidylcholine (PC) and Phosphatidylethanolamine  
1203 (PE) or PC/PE liposomes containing PI(4,5)P<sub>2</sub> and Phosphatidylserine (PS) or Folch liposomes  
1204 containing 0.1 mol% TMR labelled PI(4,5)P<sub>2</sub> to replicate conditions in **Figure 5**. (B) *In vitro*  
1205 membrane tubulation assay performed by mixing mammalian Cavin1-GFP with Folch liposomes,  
1206 with membrane tubules highlighted in insets. Scale bar – 1  $\mu$ m. (C) Dose dependent GFP-Cavin1  
1207 interaction with GMVs containing rhodamine-PE.  
1208

1209 **Figure S8. Localisation of Cavin1 with truncated DR1 and DR3 domains.**

1210 (A) Confocal microscopy images of GFP-Cavin1, GFP-Cavin1- $\Delta$ DR1 and GFP-Cavin1- $\Delta$ DR3  
1211 immunolabelled with CAV1 (red) (B) GFP-Cavin1- $\Delta$ DR3 (green) associates with microtubules (red)  
1212 in PC3 cells and disperses to the cytosol and forms liquid droplets after nocodazole treatment.  
1213 Fluorescence images acquired with a Zeiss Airyscan2 microscope. (C) Cavin1- $\Delta$ DR1-GFP with a C-  
1214 terminal GFP tag shows a similar intracellular accumulation with CAV1 in PC3 cells as the N-

1215 terminal GFP-tagged protein (**Fig. 6A**), suggesting that the GFP tag does not contribute to this  
1216 phenotype.

1217

1218 **Figure S9. Comparison of Cavin1 truncation mutants with endocytic markers.**

1219 **(A)** GFP-tagged Cavin1- $\Delta$ DR1 (green) was expressed in PC3 cells, and fixed cells were  
1220 immunolabelled for CAV1 (blue) and different endocytic markers (red) including EEA1, GM130,  
1221 LAMP1 and Rab11. Only EEA1 showed significant overlap with the internalised Cavin1- $\Delta$ DR1 and  
1222 CAV1 positive structures. **(B)** High-resolution images of GFP-tagged Cavin1 and Cavin1- $\Delta$ DR1  
1223 (green) in PC3 cells compared with EEA1 (magenta) acquired with a Zeiss Airyscan2 microscope.  
1224 **(C)** As for **(A)** but cells expressing GFP-tagged Cavin1(30-392). Cavin1(30-392) accumulates at  
1225 intracellular structures with CAV1 and positive for EEA1 labelling similarly to Cavin1- $\Delta$ DR1 with  
1226 the full deletion of the DR1 domain.

1227

1228 **Figure S10. Cavin1- $\Delta$ DR1 shows colocalisation with internalised transferrin.**

1229 Transferrin uptake assay was performed in PC3 cells expressing either mCherry-tagged Cavin1 or  
1230 Cavin1- $\Delta$ DR1 (red) with transferrin Alexa-488 (green). Wild-type mCherry-Cavin1 showed no  
1231 colocalization with endocytosed transferrin whereas mCherry-Cavin1- $\Delta$ DR1 formed large structures  
1232 (red) with transferrin positive endosomes surrounding them.

1233

1234 **Figure S11. PLA assay of Cavin1 interactions with CAV1**

1235 Representative images of proximity ligation assays of Cavin1 and CAV1 interactions, with GFP-  
1236 tagged Cavin1 mutants in green and PLA signal in red. Scale bar – 10  $\mu$ m. Related to **Fig. 7C**.

1237

1238 **Figure S12. Localisation and membrane remodelling by Cavin1(1-345) mutant proteins.**

1239 **(A)** GFP-tagged Cavin1(1-345) mutant DR1mut1 was expressed in PC3 cells, and fixed cells were  
1240 immunolabelled for CAV1 (blue) and different endocytic markers (red) including EEA1, GM130,  
1241 and LAMP1. Like the complete deletion of the residues 1-30 in the Cavin1 DR1 region (**Fig. S9C**)  
1242 Cavin1(1-345) mutant DR1mut1 shows significant overlap with CAV1 and EEA1 positive internal  
1243 structures. **(B)** APEX-GBP labelling of GFP-tagged Cavin1(1-345) mutant DR1mut1 shows  
1244 accumulation and clustering with internal membrane vesicles (arrows). **(C)** The diffusion rate  
1245 measured by FCS of selected GFP-tagged Cavin1(1-345) DR mutants in lysates after expression in  
1246 MCF7 cells (lacking endogenous Cavins and Caveolins). N = 3, n = 15-25. Error bars indicate mean  
1247  $\pm$  SD, \*\*P<0.05, \*\*\* P<0.001, ns – not significant. **(D)** APEX-GBP labelling of GFP-tagged  
1248 Cavin1(1-345) mutant DR3mut9 shows droplet localisation (arrows). **(E)** Purified Ub-tagged  
1249 Cavin1(1-345) mutant DR3mut9 was mixed with unilamellar Folch liposomes (extruded to 400 nm

1250 diameter) and analysed by negative stain EM (1% uranyl acetate). This mutant is able to remodel and  
1251 tubulate these synthetic membranes, although with a slightly larger diameter than wild-type Cavin or  
1252 Cavin1(1-345) (**Fig. 4D**). (**F**) GFP-Cavin1 and various DR mutants of Cavin1 (1-345) were expressed  
1253 in PC3 cell line and immunolabelled for CAV1 after fixation. The co-localization of GFP tagged  
1254 cavin variants and CAV1 was quantified by Pearson's correlation coefficient. N = 2, n = 8-12. Error  
1255 bars indicate mean  $\pm$  SD. \*\*P<0.05, \*\*\* P<0.001.

1256

1257 **Figure S13.** (**A to G**) Gels showing purified recombinant Cavin1 proteins used in this study. (**H**)  
1258 Western blot showing expression of GFP tagged mutants expressed in PC3 cell line probed with anti-  
1259 GFP antibody. (**I**) SDS-PAGE and in gel fluorescence profile of Cavin1-GFP purified from HEK  
1260 cells using GFP nanobody and subjected size exclusion chromatography on superose 6 (10/300)  
1261 column. (**J**) The diffusion time measurements for three dyes performed before each FCS session.

1262

1263



1264 **Movie S1. (related to Fig. 4B).**

1265 Cryoelectron tomography (CryoET) of Cavin1-coated membrane tubules. The movies shows a series  
1266 of images panning through the three-dimensional tomographic volume. Striated protein densities are  
1267 observed coating the relatively heterogeneous membrane tubules.

1268

1269 **Movie S2. (related to Fig. 6B).**

1270 GFP-tagged Cavin1- $\Delta$ DR3 was expressed in PC3 cells and photobleaching was performed on a small  
1271 region along microtubules coated with GFP tagged mutant protein. Images were acquired one frame  
1272 per second.

1273

1274 **Movie S3. (related to Fig. 6C).**

1275 GFP-tagged Cavin1- $\Delta$ DR3 was expressed in PC3 cells and treated with nocodazole (10  $\mu$ M).  
1276 Photobleaching was performed on a small region containing liquid droplets of mutant protein and  
1277 images were acquired one frame per second.

1278

1279 **Movie S4. (related to Fig. 6F).**

1280 GFP-tagged Cavin1 and Rab5a-mCherry were co-expressed in PC3 cells and images were acquired  
1281 one frame per four seconds.

1282

1283 **Movie S5. (related to Fig. 6F).**

1284 GFP-tagged Cavin1- $\Delta$ DR1 and Rab5a-mCherry were co-expressed in PC3 cells and images were  
1285 acquired one frame per four seconds.

1286

1287 **Movie S6. (Related to Fig. 8E).**

1288 GFP-Cavin1 DR3mut9 mutant expressed in PC3 cell line and photobleaching was performed on  
1289 protein droplets dispersed in cytosol. Images were acquired one frame per two seconds.

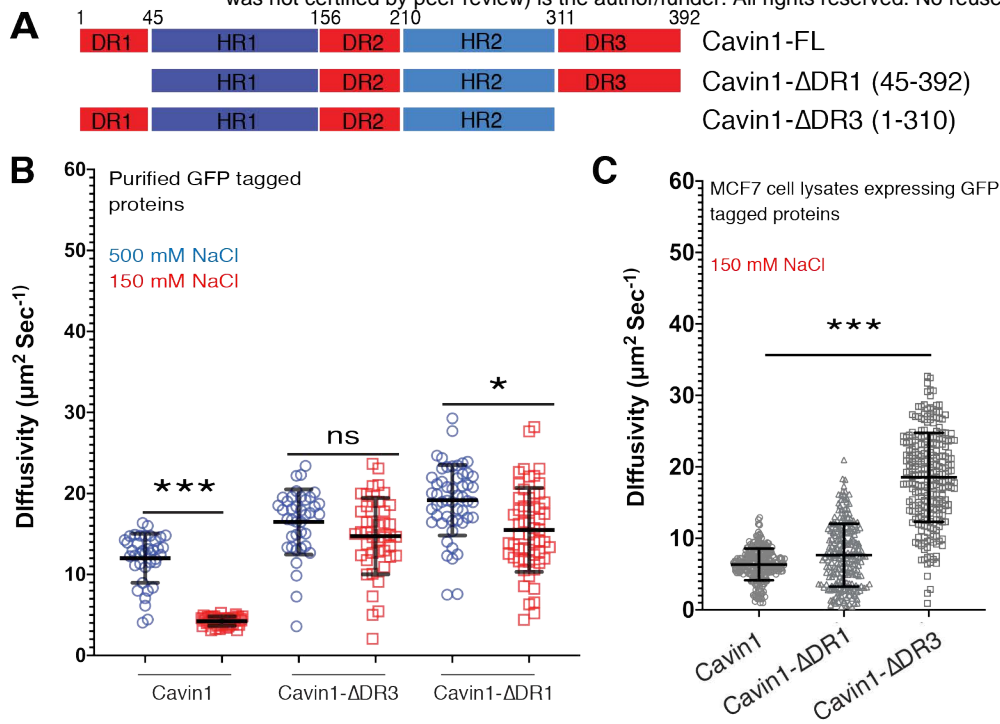

Figure 1. The Cav1 N- and C-terminal DR domains are important for self-association into oligomers.

(A) Schematic representation of Cav1 and truncations. DR, disordered region; HR, helical region. (B) The diffusion rate of Cav1, Cav1-ΔDR1 and Cav1-ΔDR3 in solution assessed by fluorescence correlation spectroscopy (FCS). Bacterially expressed and purified ubiquitin and GFP tagged proteins (Fig. S2) were analysed in high NaCl concentration (500 mM) and physiological NaCl concentration (150 mM). Error bars indicate mean  $\pm$  SD (standard deviation), N=2, n=10-15, ns – not significant, \*P<0.05 \*\*\*P<0.001. (C) The diffusion rate of GFP-tagged Cav1, Cav1-ΔDR1 and Cav1-ΔDR3 in lysates after expression in MCF7 cells (lacking endogenous Cavins and Caveolins). Buffer contained 150 mM NaCl. N=3, n=20-25, ns – not significant, \*\*\*P<0.001. Error bars indicate mean  $\pm$  SD.

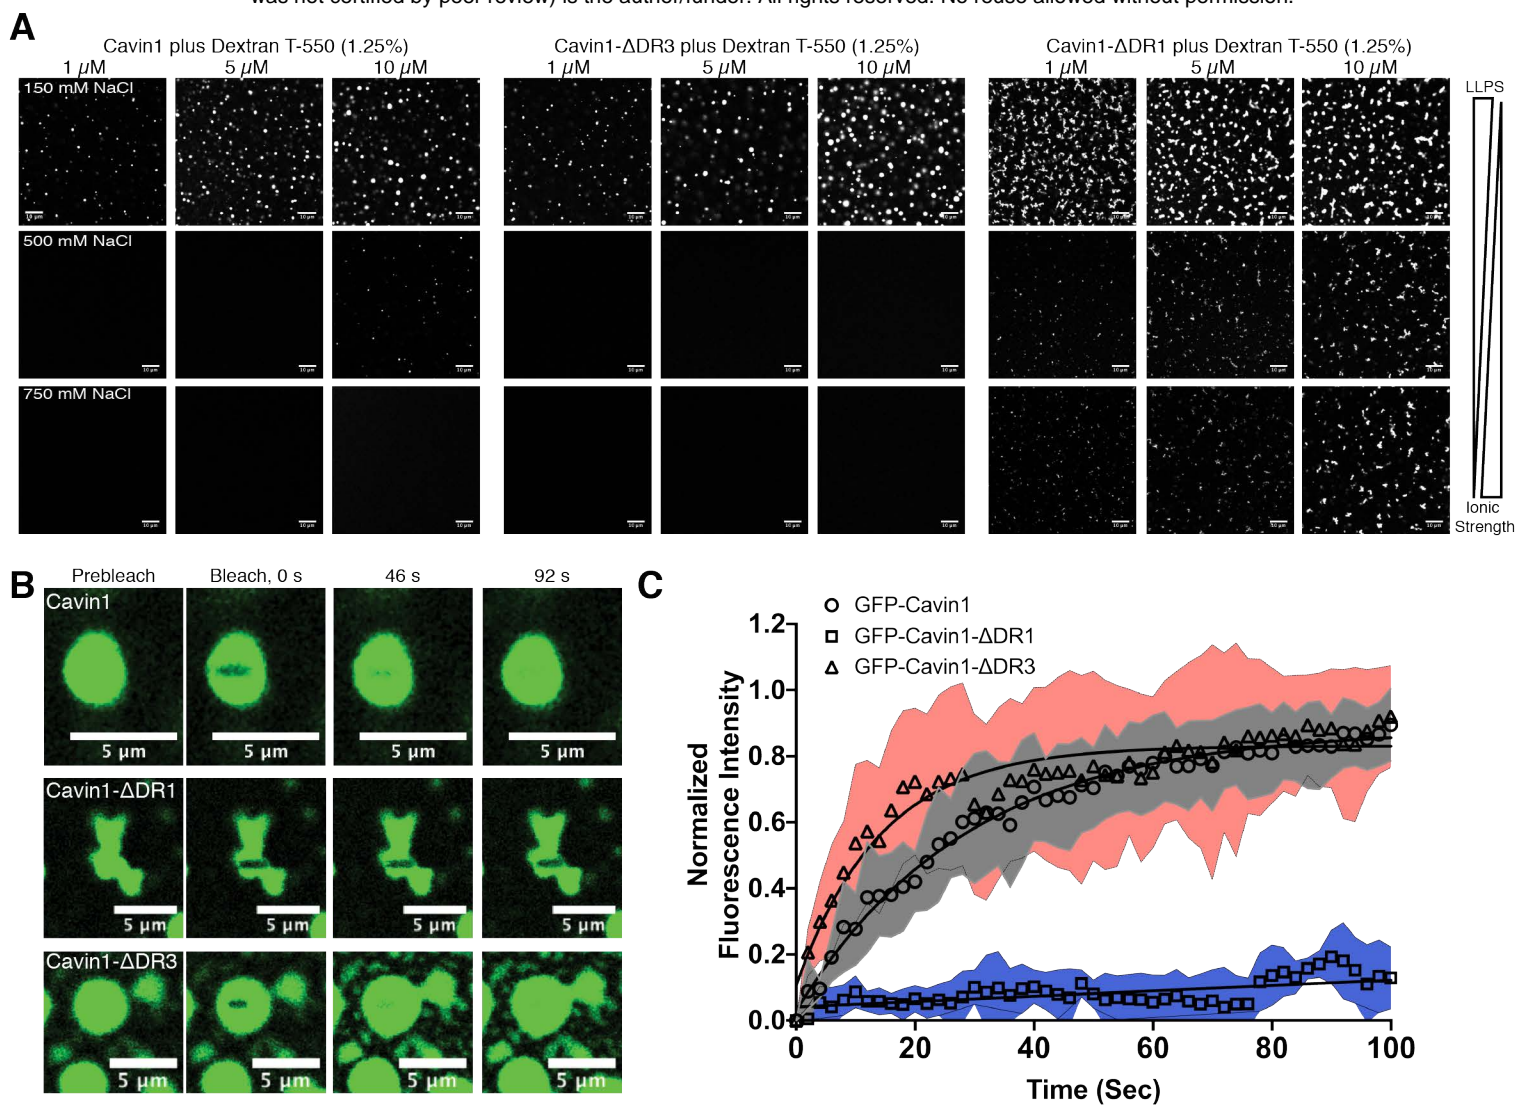

Figure 2. Cavin1 undergoes liquid-liquid phase separation in vitro.

(A) Liquid-liquid phase separation (LLPS) assays with recombinant Ub- and GFP-tagged Cavin1, Cavin1- $\Delta$ DR3 and Cavin1- $\Delta$ DR1 at different protein and salt concentrations. Scale bar = 10  $\mu$ m. (B) Fluorescence recovery after photobleaching (FRAP) assay with Cavin1, Cavin1- $\Delta$ DR3 and Cavin1- $\Delta$ DR1 showing GFP fluorescence images at increasing times. Scale bar = 5  $\mu$ m. (C) Plot of normalized fluorescence intensity after photobleaching. N=6-8, Grey, blue and pink shaded areas around recovery curves represent standard deviation (SD). While Cavin1 and Cavin1- $\Delta$ DR3 droplets rapidly exchange with the bulk solution and recover their fluorescence, Cavin1- $\Delta$ DR1 shows virtually no exchange indicating gel formation.

**A**

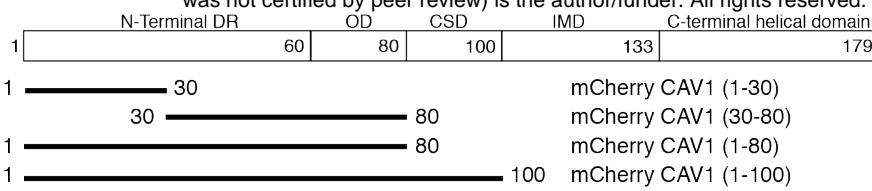

CAV1 (1-100)

WT MSGGGKYVDSEGHLYTVPVIREQGNIIKPNNAKMAEEMSEKQVYDAHTKEIDL VNRDPKHLNDDVVKIDFEDVIAEPEGTHSFDGIWKASFTTFTVTKYWFY  
M1 MSGGGKYVDSEGHLYTVPVIREQGNIIKPNNAKMAEEMSEKQVYDAHTKEIDL VNAAKHLNDDVVKIDFEDVIAEPEGTHSFDGIWKASFTTFTVTKYWFY  
M2 MSGGGKYVDSEGHLYTVPVIREQGNIIKPNNAKMAEEMSEKQVYDAHTKEIDL VNRDPKHLNDDVVKIDGSSGSSGSEGTHSFDGIWKASFTTFTVTKYWFY  
M3 MSGGAYVASAGHLYTVPVIREQGNIIKPNNAKMAEEMSEKQVYDAHTKEIDL VNAAPKHLNAAVVKIAFAAVIAAPAGTHSFDGIWKASFTTFTVTKYWFY  
M4 MSGGAYVASAGHLYTVPVIREQGNIIKPNNAKMAEEMSEKQVYDAHTKEIDL VNRDPKHLNDDVVKIDFEDVIAEPEGTHSFDGIWKASFTTFTVTKYWFY  
M5 MSGGGKYVDSEGHLYTVPVIREQGNIIKPNNAKMAEEMSEKQVYDAHTKEIDL VNAAPKHLNDDVVKIDFEDVIAEPEGTHSFDGIWKASFTTFTVTKYWFY

**B**

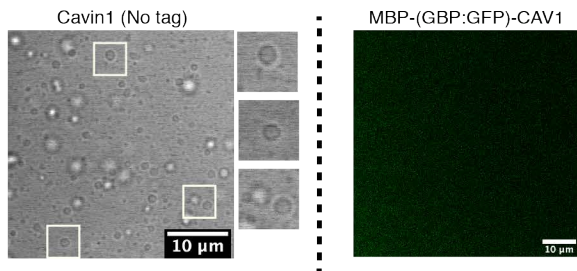

**C**

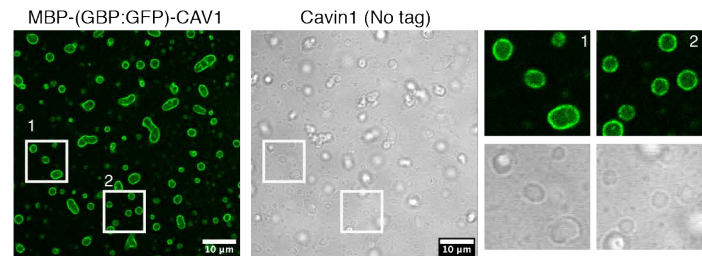

**D**

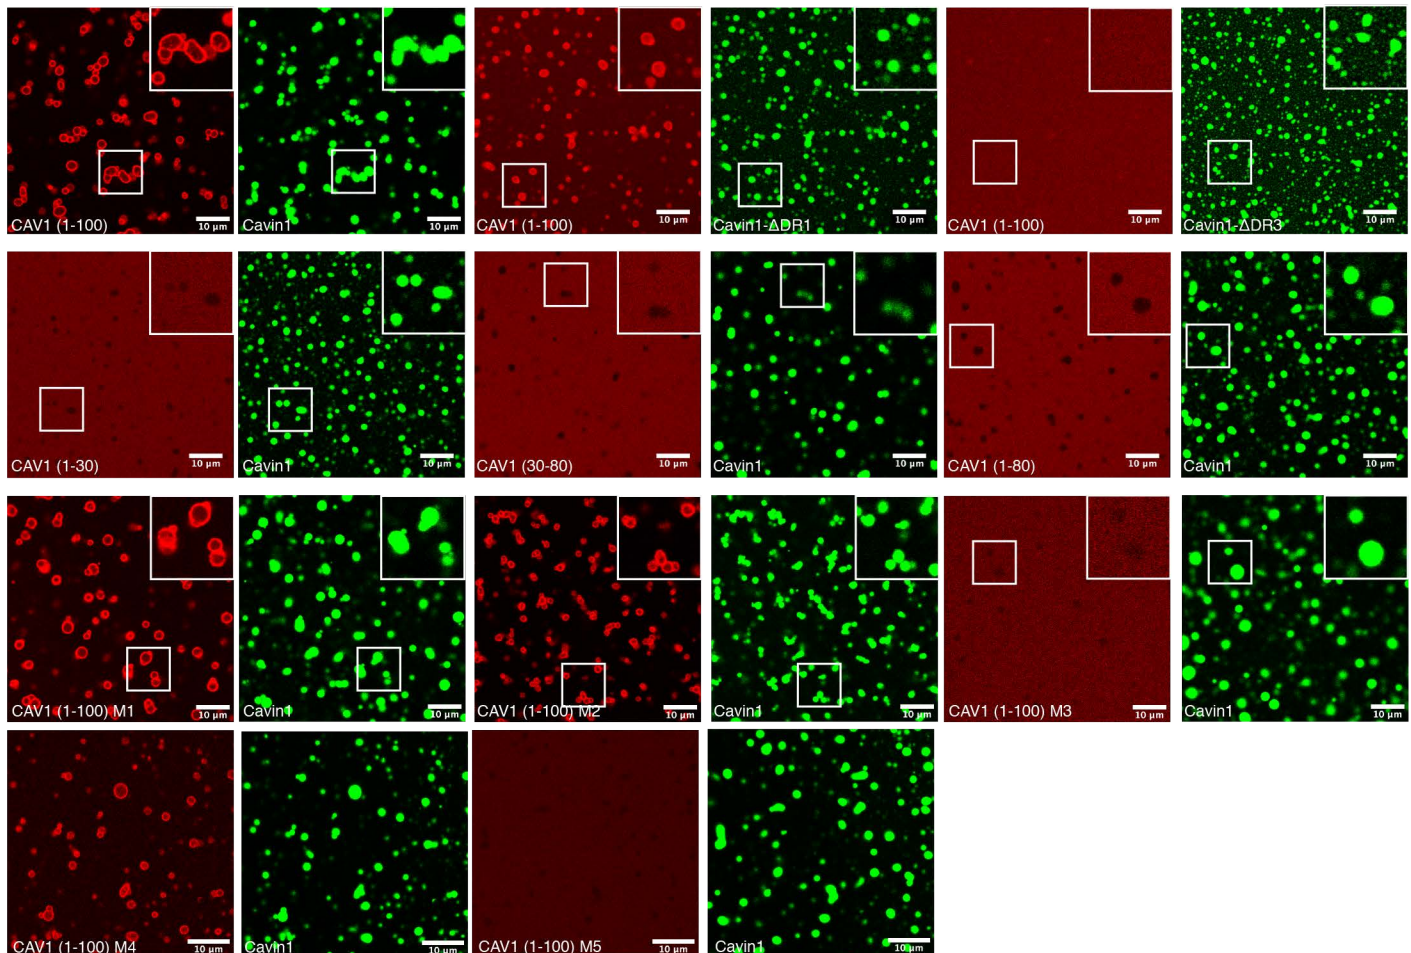

Figure 3. CAV1 N-terminus co-phase separates with Cavin1

(A) Schematic representation of CAV1 domain architecture and design of various domain / point mutations. LLPS assays with MBP-GBP-CAV1 and cavin1 independently (B) and in mixture (C). MBP-GBP-CAV1 does not undergo LLPS in isolation but co-phase separates with Cavin1. (D) LLPS assays with different CAV1 DR region mutations and GFP-Cavin1 or Cavin1-DDR3 or Cavin1-DR1. Scale bar – 10  $\mu$ m. Among all truncation mutations tested, only mCherry-CAV1 (1-100) was able to co-phase separate with Cavin1. Among CAV1 DR point mutations (M1 to M5), mutants M1, M2 and M4 were able to co-phase separate with GFP-Cavin1 while total charge inversion mutant M3 and mutant M5 failed to co-phase separate highlighting the importance of charged residues in CAV1-Cavin1 association.

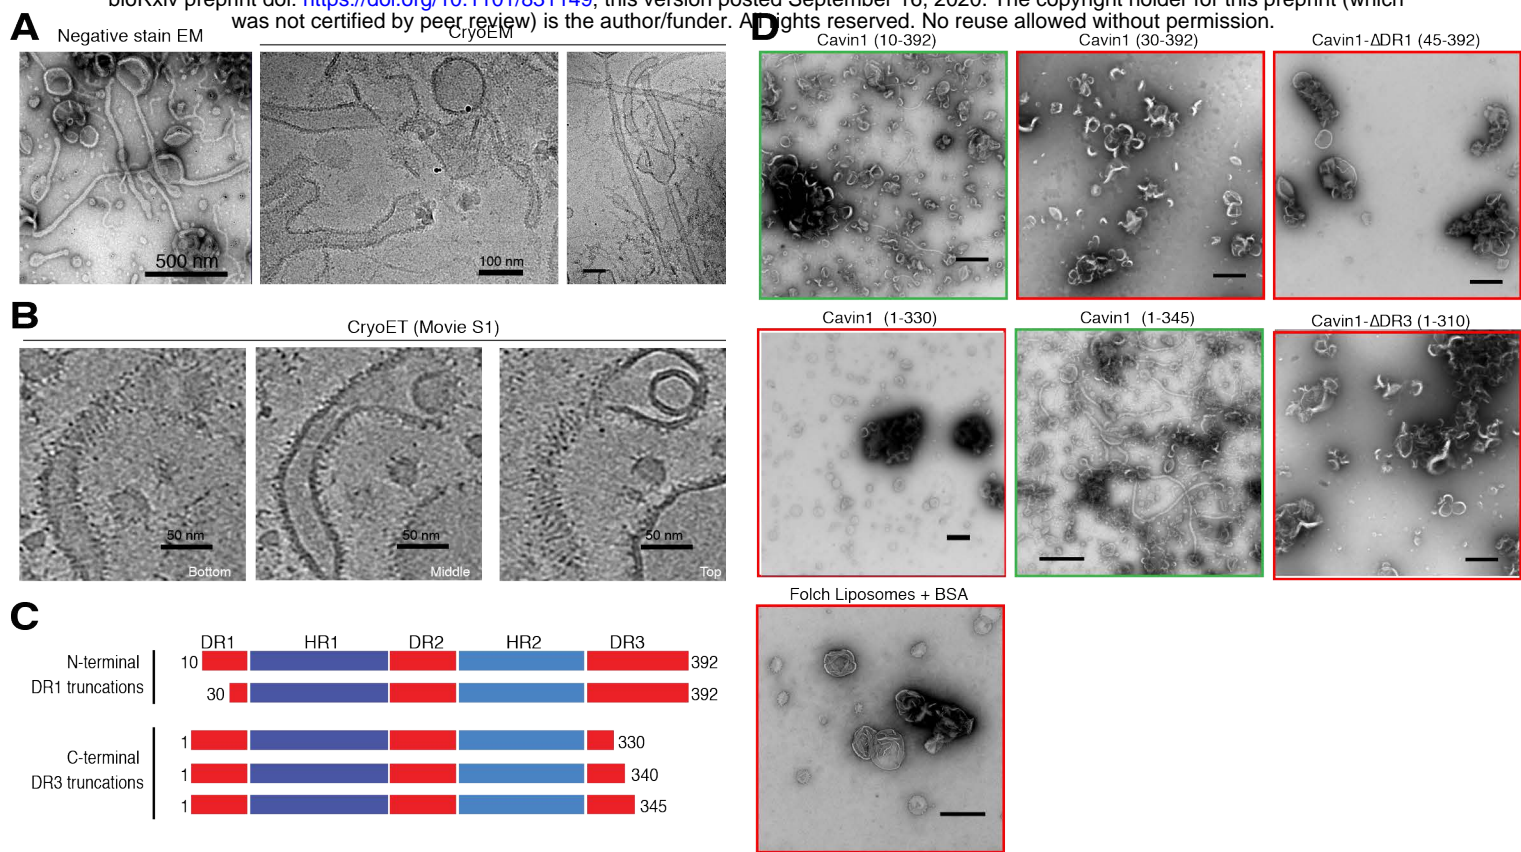

Figure 4. The Cavin1 DR domains are required for membrane remodelling in vitro.

(A) Purified Ub-tagged full length Cavin1 was mixed with Folch 400 nm unilamellar liposomes and analysed by both negative stain EM (1% uranyl acetate) and cryoEM. (B) Cryoelectron tomography (CryoET) of Cavin1-coated membrane tubules showing bottom, middle and top sections of three-dimensional projections. Striated protein densities are observed coating the relatively heterogeneous membrane tubules. The full tomogram is shown in Movie S1. (C) Schematic diagram of Cavin1 and different truncation constructs examined for their ability to remodel membranes in vitro. (D) Purified Ub-tagged Cavin1 truncations were mixed with Folch 400 nm unilamellar liposomes and analysed by negative stain EM (1% uranyl acetate). Full membrane tubulation and remodelling activity requires residues 1-30 in DR1, and residues 330-345 in DR3. Scale bar = 500 nm.

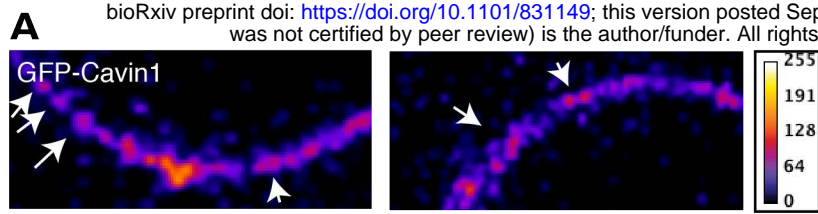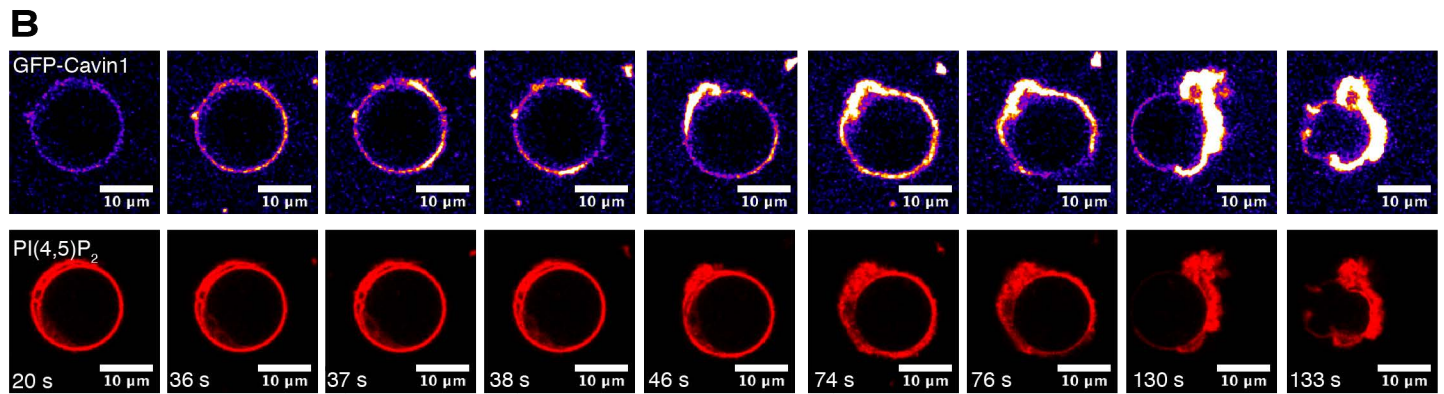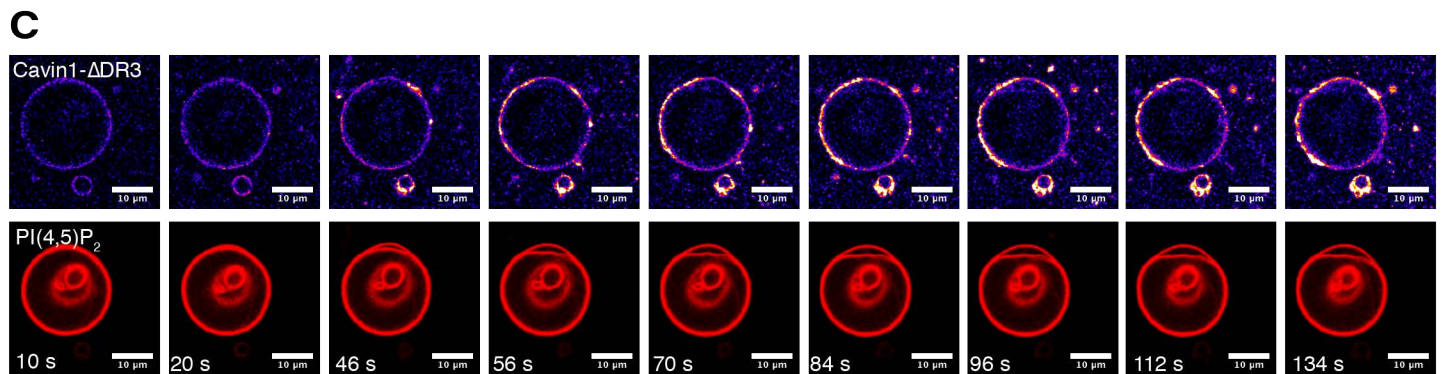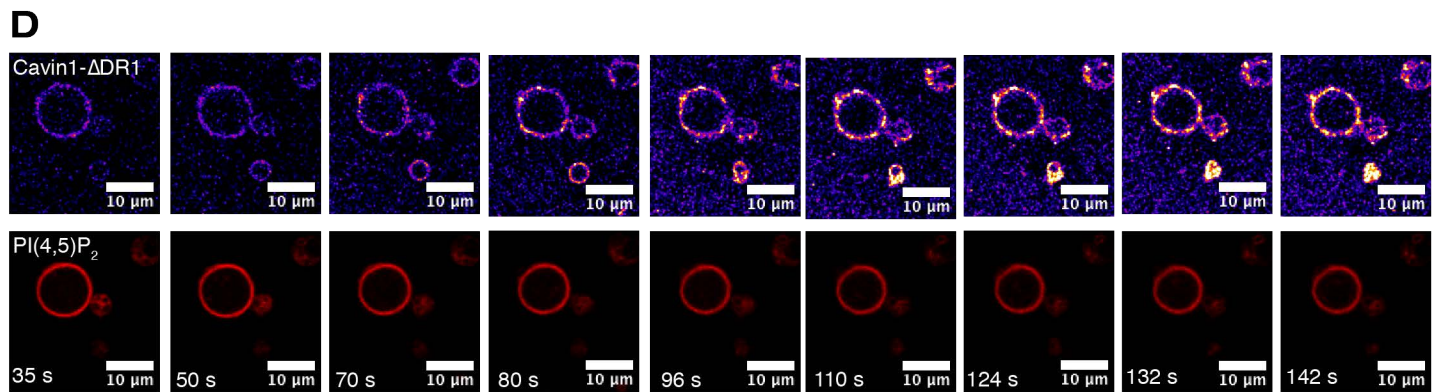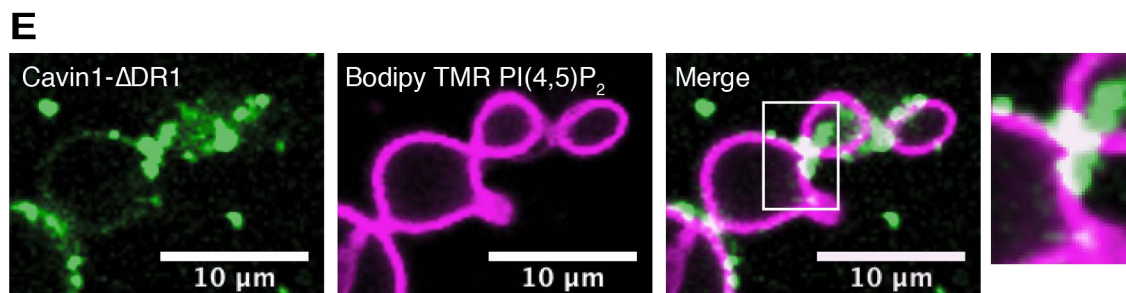

Figure 5. Removing the Cavin1 DR domains prevents deformation of GMV membranes.

(A) Purified Ub- and GFP-tagged Cavin1 shows strong localised clustering on the surface of Folch giant multilamellar vesicles (GMV) containing Bodipy-TMR-labelled PI(4,5)P<sub>2</sub> (0.1 mol%). Cavin1 (B), Cavin1-ΔDR3 (C) or Cavin1-ΔDR1 (D) were incubated with Folch GMVs containing Bodipy-TMR-labelled PI(4,5)P<sub>2</sub> (0.1 mol%), allowed to settle on glass coverslips and images were acquired one frame per second. Frame numbers are indicated in PI(4,5)P<sub>2</sub> channel (red). (E) GMVs incubated with Cavin1-ΔDR1 were often observed to be tethered to each other with Cavin1-ΔDR1 concentrated at the contact sites. Scale bar = 10 μm.

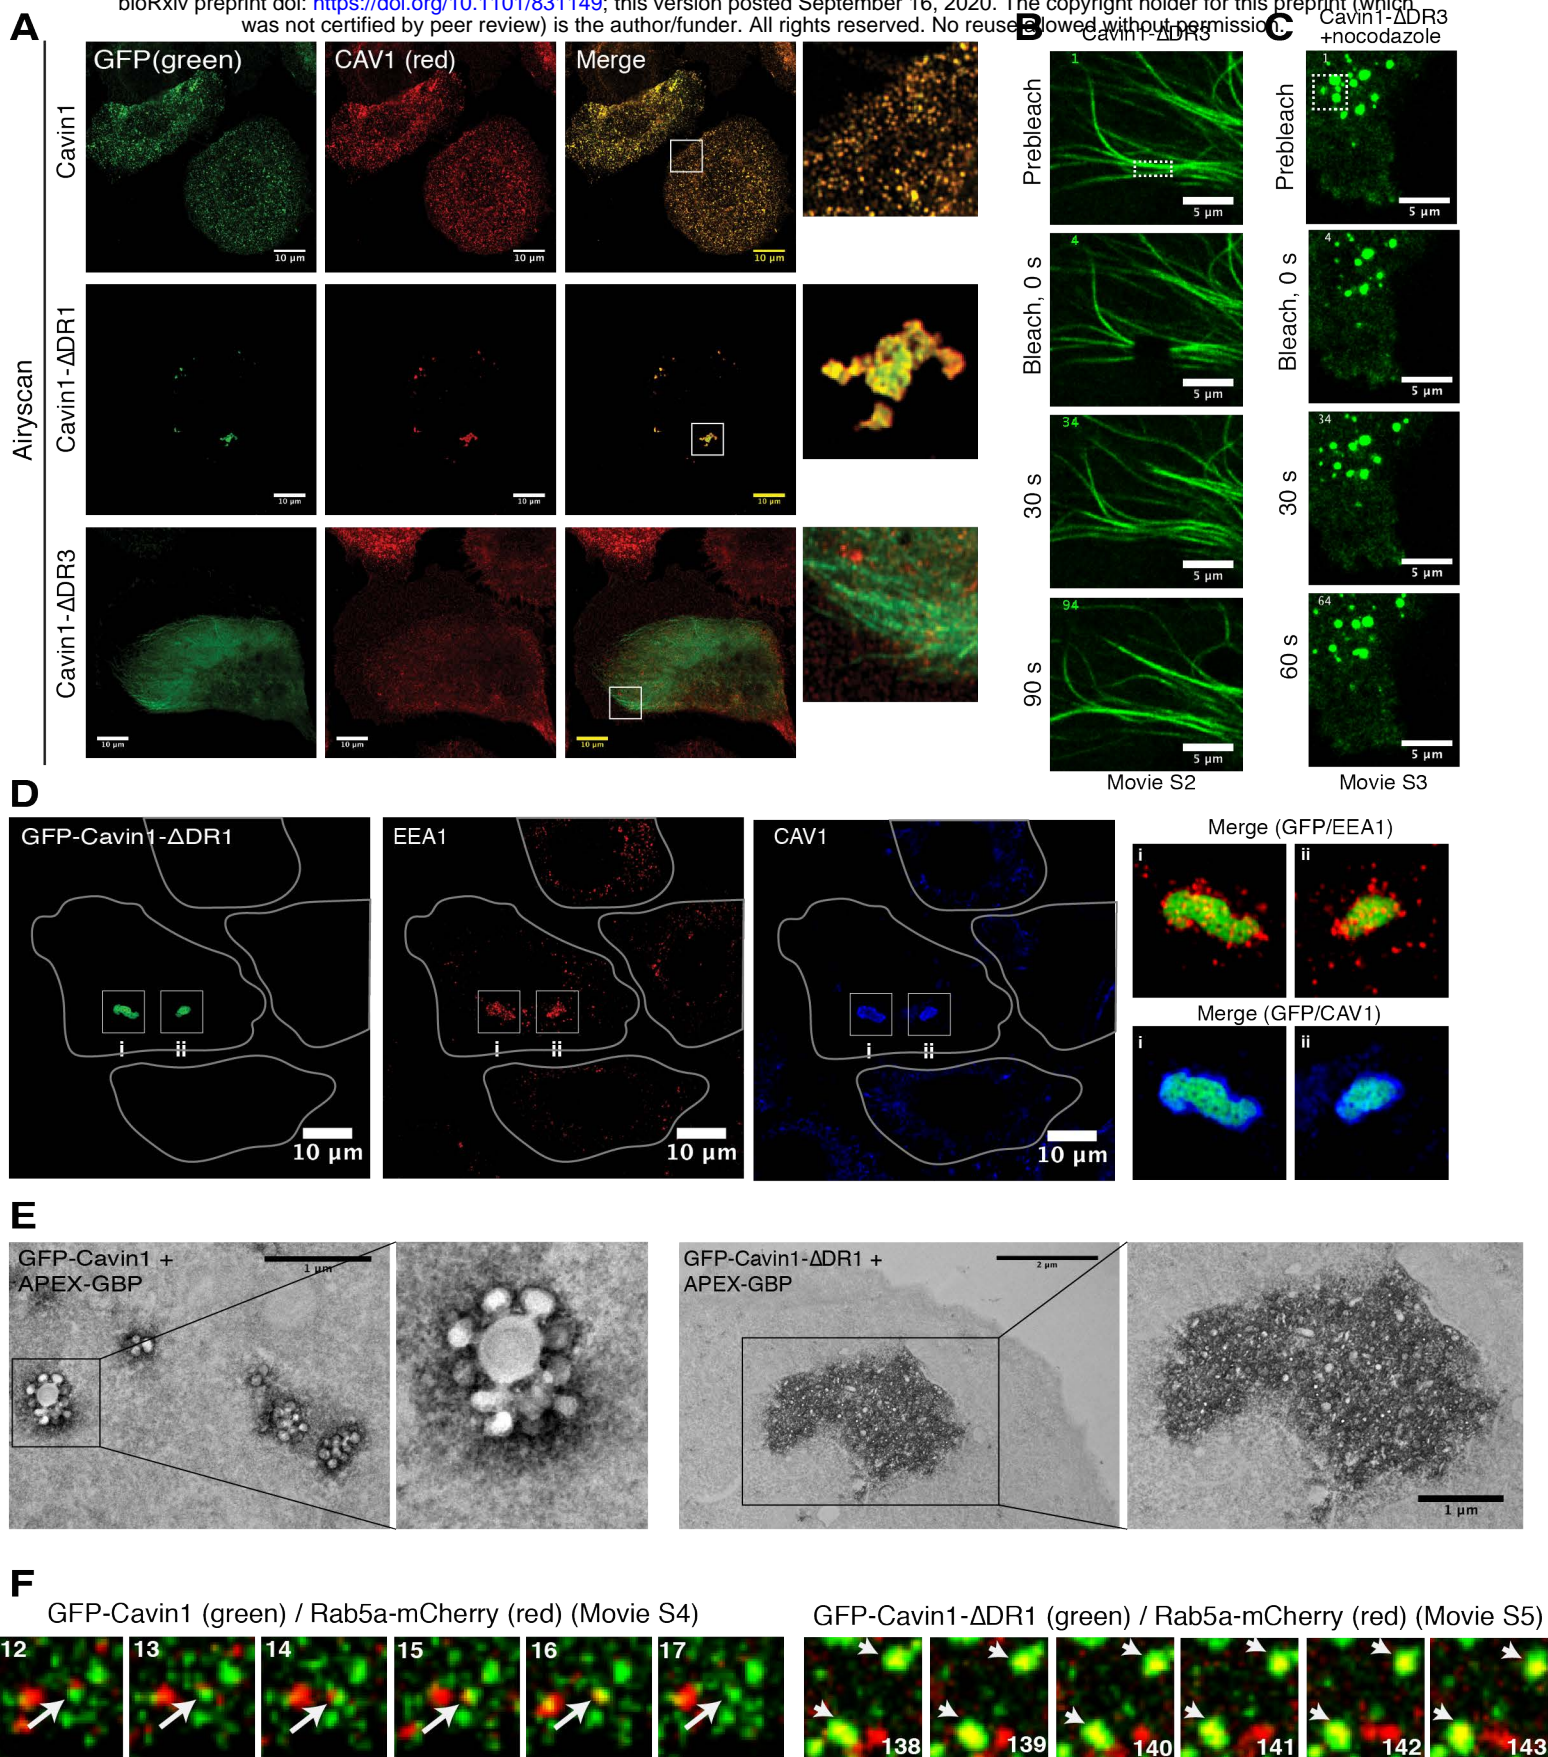

Figure 6. The Cavin1 DR domains are essential for caveola formation with CAV1.

(A) GFP-tagged Cavin1 and truncations (green) were expressed for 24 h in PC3 cells, fixed and immunolabelled for Caveolin1 (CAV1) (red). Full length Cavin1 forms typical caveola puncta, colocalising with CAV1 at the cell surface. Cavin1-ΔDR1 mutant expression leads to formation of tethered intracellular CAV1-positive clusters. Cavin1-ΔDR3 shows cytoplasmic and microtubule localisation. Images were collected using a Zeiss fast Airyscan microscope. Scale bar = 10 μm. Fluorescence recovery after photo-bleaching (FRAP) analysis of GFP-Cavin1-ΔDR3 before (B) and after (C) nocodazole (10 μM) addition. Scale bar – 5 μm (D) In PC3 cells GFP-tagged Cavin1-ΔDR1 truncation shows colocalization with the early endosomal marker (EEA1) (red) and CAV1 (blue). Inset shows merge images of GFP-Cavin1-ΔDR1/EEA1 and GFP-Cavin1-ΔDR1/CAV1. Scale bar = 10 μm. (E) GFP-tagged Cavin1 and Cavin1-ΔDR1 were visualised in PC3 cells by electron microscopy and labelling of GFP tagged proteins using APEX-GBP staining. Scale bar = 1 μm. (F) Live imaging of PC3 cells expressing Rab5a-mCherry with either GFP-Cavin1 or GFP-Cavin1-ΔDR1. Images were acquired one frame per four seconds and frame numbers are indicated in boxes. Arrows indicate mCherry/GFP signal co-localisation or separation event.

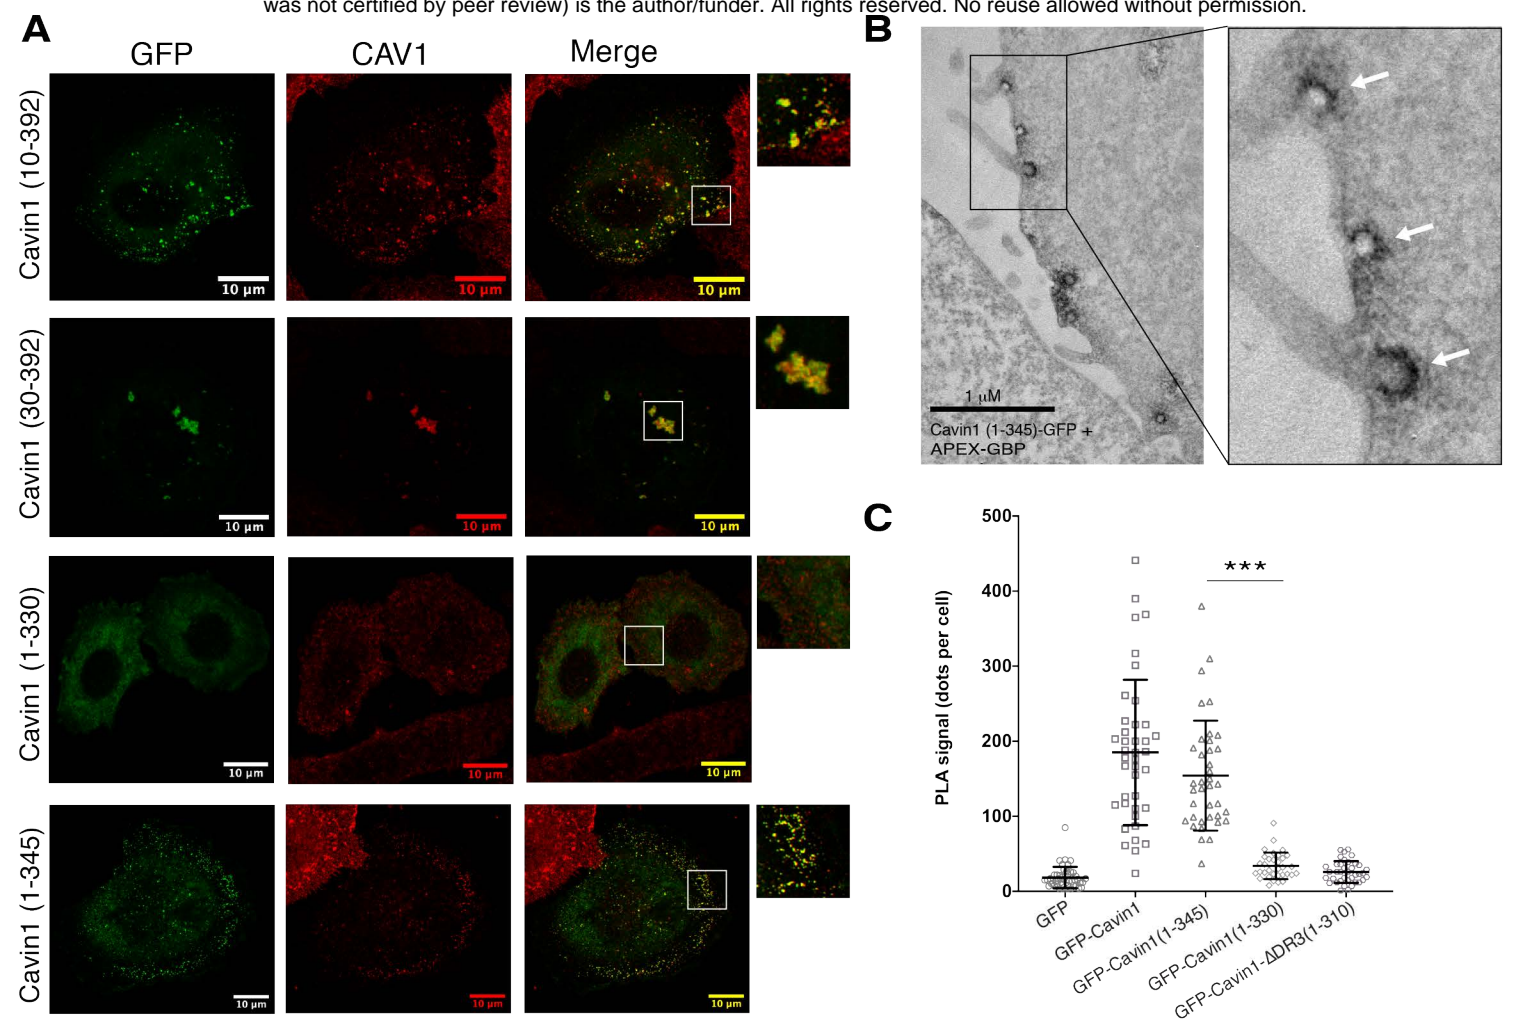

Figure 7. Definition of the minimal DR sequences required for Cavin1 function.

(A) GFP-tagged Cavin1 DR domain truncation mutants (green) (Fig. 3C) were expressed in PC3 cells and immunolabelled with CAV1 (red). Residues 1-30 in DR1 and 330-345 are required for caveola formation. Scale bar = 10  $\mu$ m. (B) APEX-GBP labelling of GFP tagged Cavin1(1-345) shows normal bulb-shaped caveolae at the plasma membrane. (C) Proximity ligation assay (PLA) analyses show that truncation of Cavin1 from the C-terminus beyond residue 345 results in loss of association with CAV1. PLA signal was quantified as dots per cell for specific interaction between GFP-tagged proteins and CAV1, N = 2 (independent biological replicates), n = 10-15 (cells per replicates), Error bars indicate mean  $\pm$  SD, \*\*\* P<0.001.



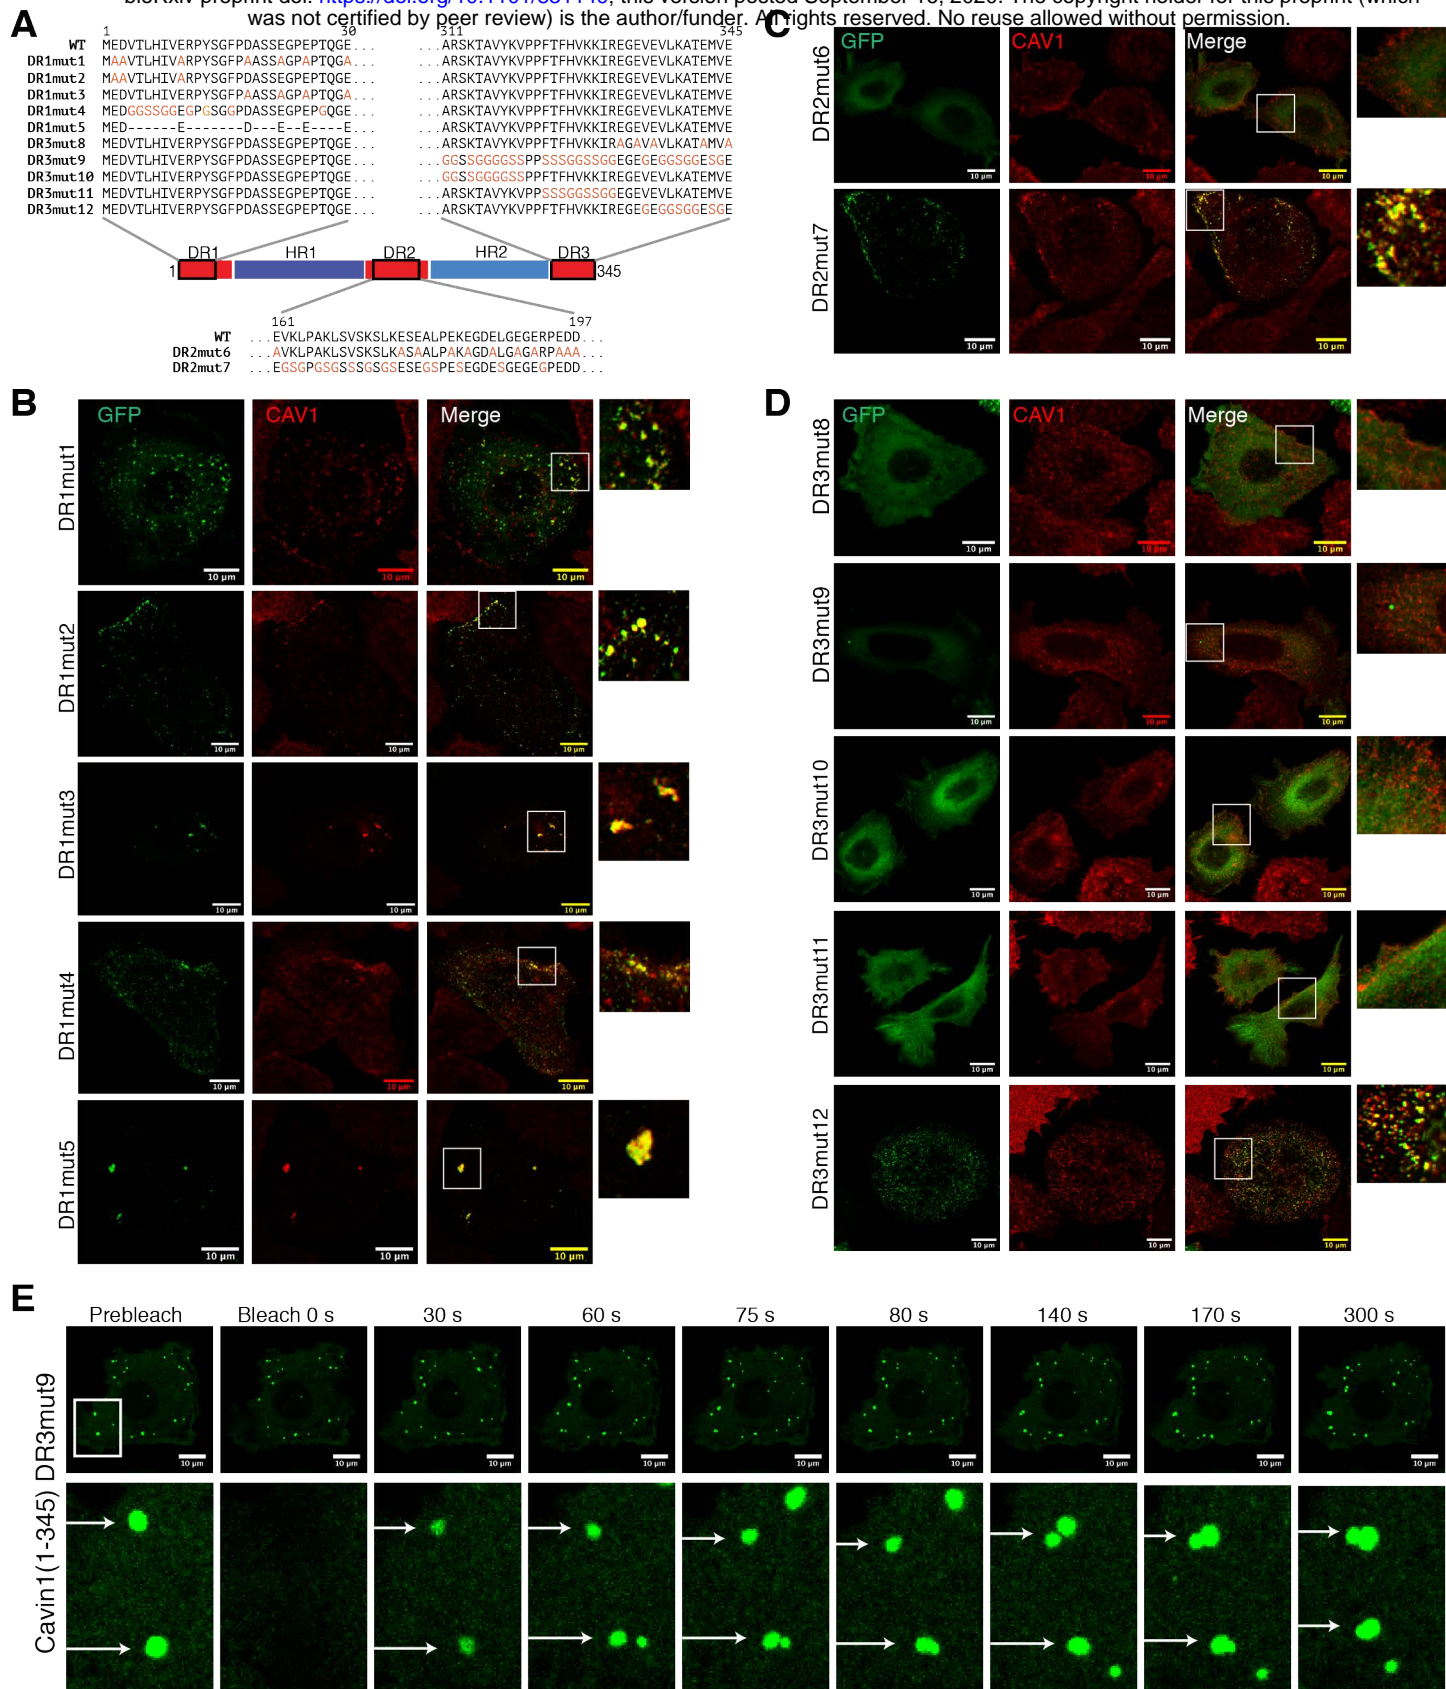

Figure 8. Sequence requirements of the Cav1 DR domains in caveola assembly.

(A) Schematic diagram of Cav1(1-345) with the sequences of the various point mutants indicated. DR1, DR2 and DR3 mutations occur in the regions 1-30, 161-197 and 311-345 respectively. (B) GFP-tagged Cav1(1-345) DR1 domain mutants (green), (C) DR2 domain mutants and (D) DR3 domain mutants expressed in PC3 cells and immunolabelled with endogenous CAV1 (red). Images in (B), (C) and (D) were by Airyscan confocal microscopy. Scale bar = 10  $\mu$ m. (E) FRAP analysis of Cav1(1-345) DR3mut9 mutant showing fast recovery of fluorescence in cytosolic droplets and also droplet fusion events (marked by arrow).

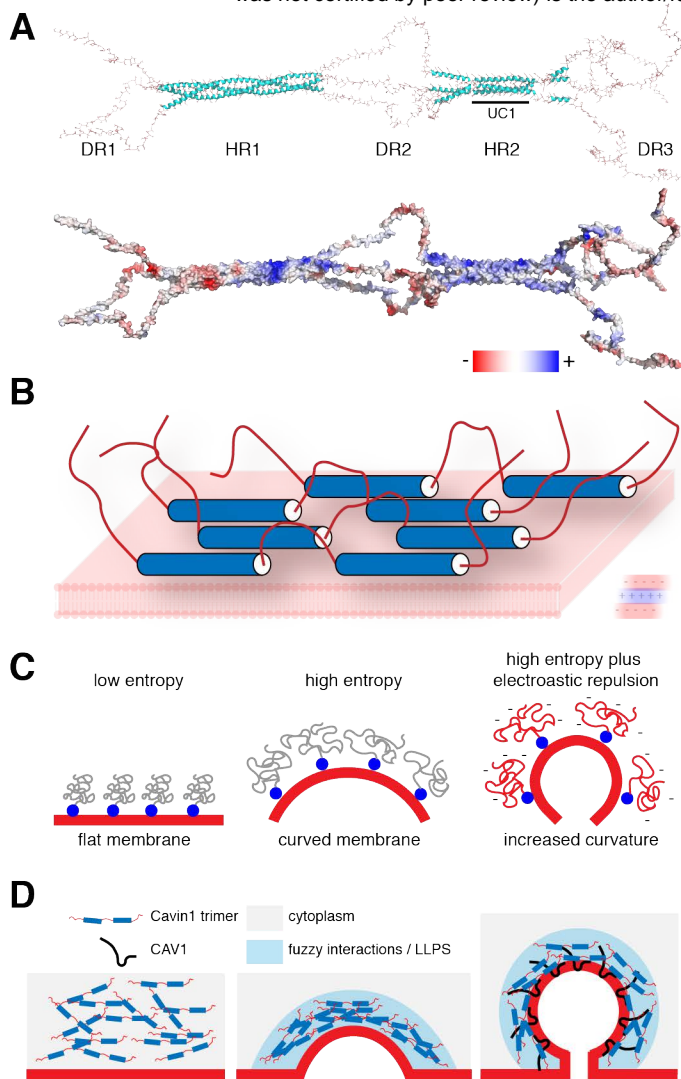

Figure 9. Model for the role of Cav1 DR domains in LLPS and caveola formation.

(A) Structural model of a Cav1 homotrimeric assembly. The trimeric HR1 coiled-coil domain is derived from the crystal structure of the mouse Cav1 HR1 domain 11, the UC1 and HR2 domains are modelled as described previously 10, and the DR domains are modelled as random coil structures (see Methods for further details). The structure is shown in ribbon diagram (top) and with an electrostatic surface representation (bottom). (B) Proposed orientation of Cav1 proteins on the membrane surface, with membrane-binding HR1 and HR2 domains associated with the phospholipid bilayer and negatively charged DR sequences directed outwards due to electrostatic repulsion. (C) Potential role of Cav1 disordered sequences in membrane curvature generation due to steric crowding. This concept is largely derived from previous studies of other membrane-associated proteins 65, 66. (D) Potential role of Cav1 fuzzy interactions and LLPS in membrane curvature generation, CAV1 interaction and caveola formation.

**A**

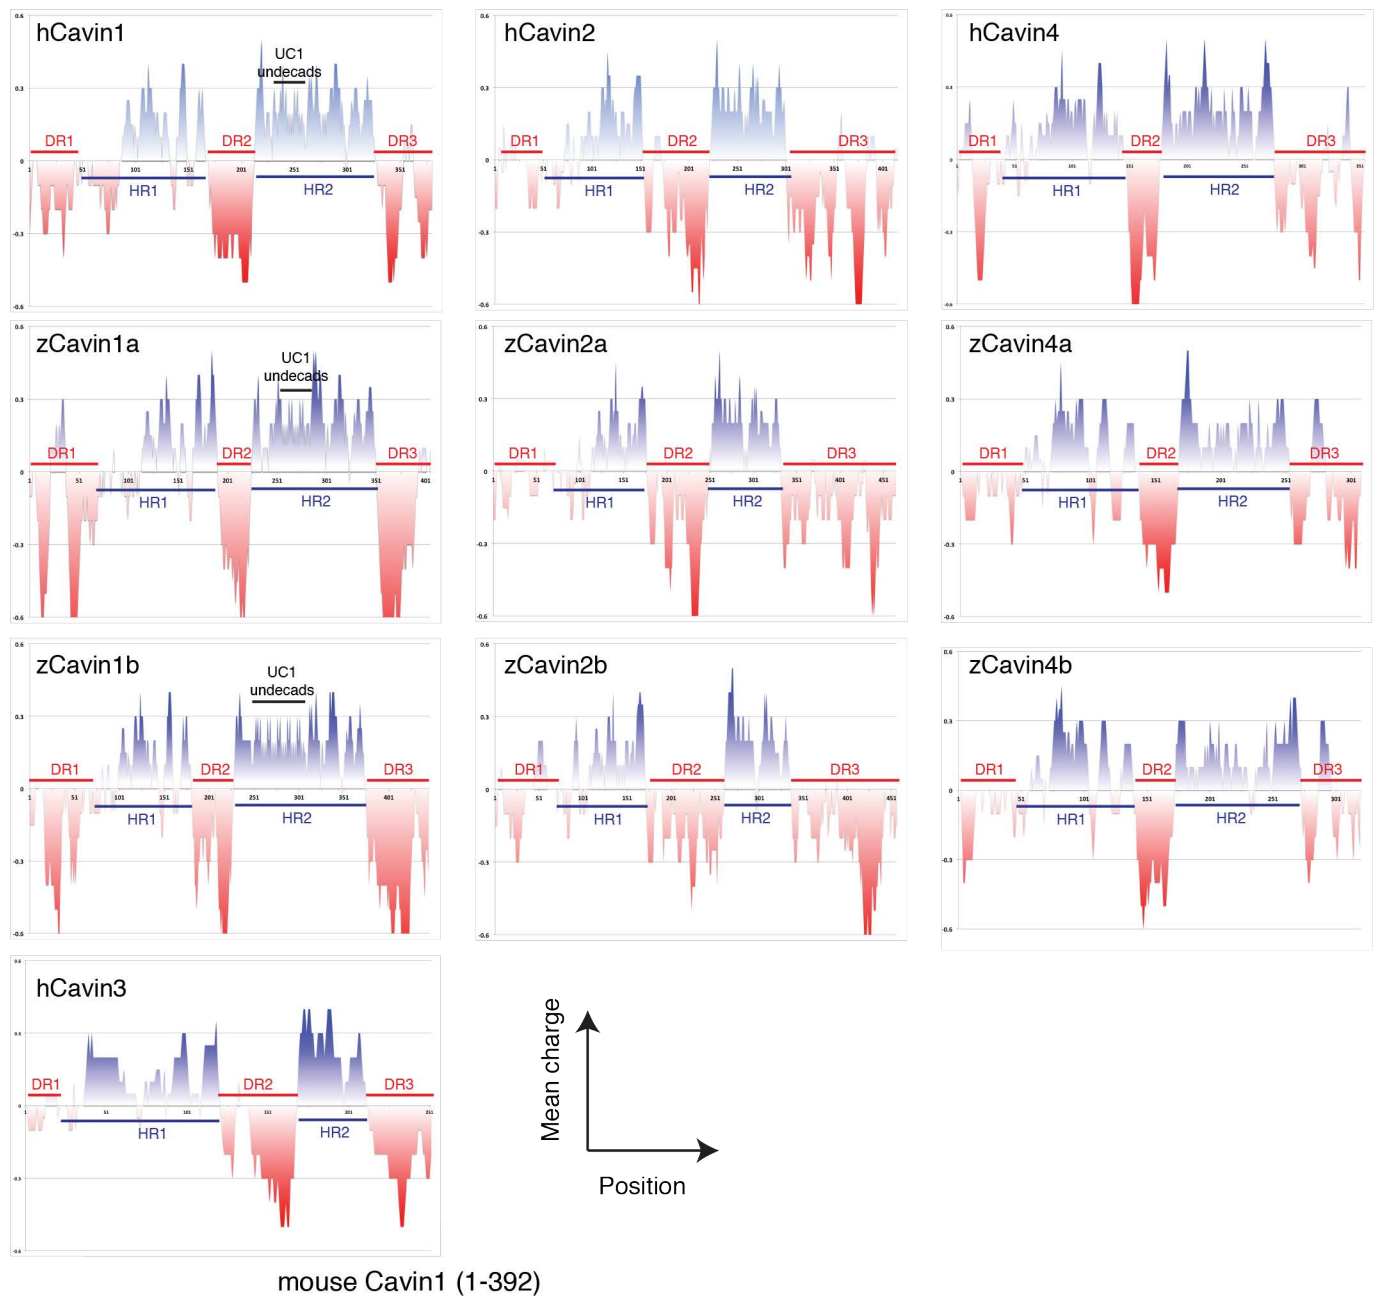

**B**

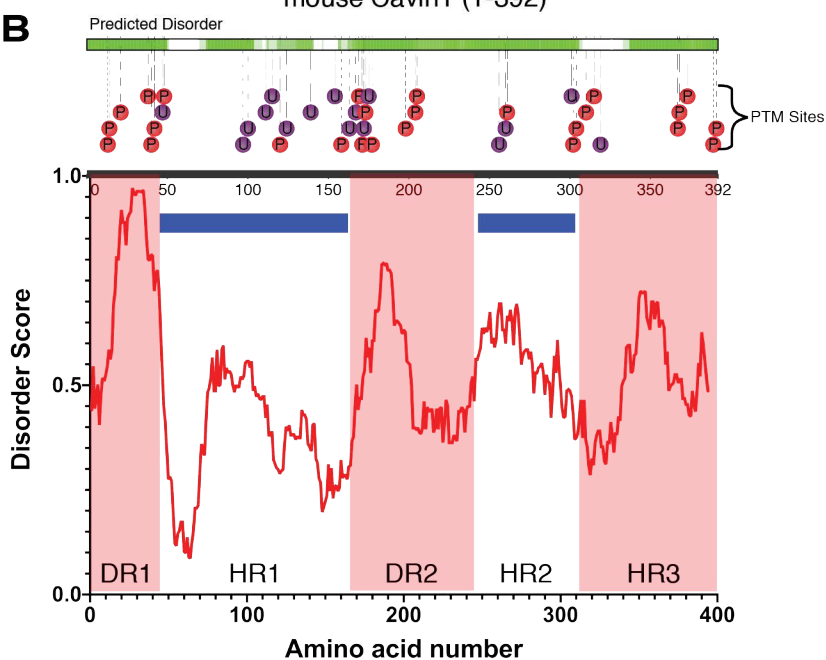

Figure S1. Electrostatic charge distribution and sequence disorder in the Cavin family proteins.

(A) Protein charge plots of human (h) and zebrafish (z) cavin family proteins performed using the Emboss Server (<http://www.bioinformatics.nl/cgi-bin/emboss/charge>) (using standard input parameters and a window width of five amino acid residues). (B) The Cavin1 sequence was analysed using the D2P2 web server 15 for predicted regions of disorder, and also known sites of post-translational modifications.

## Mouse Cavin1 bacterial expression constructs

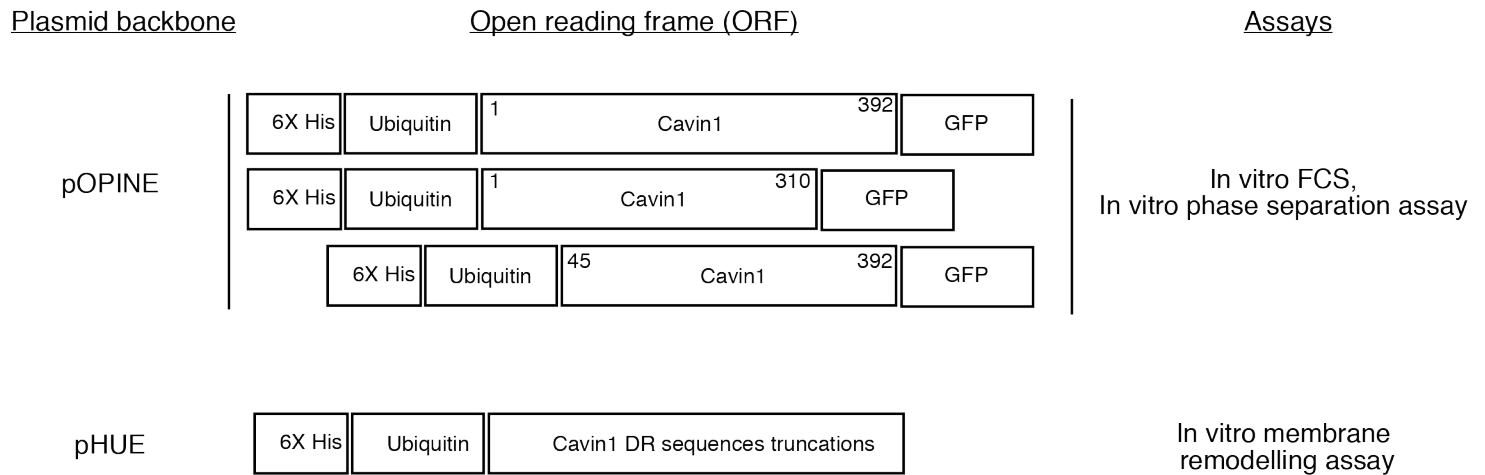

## Dog CAV1 bacterial expression constructs

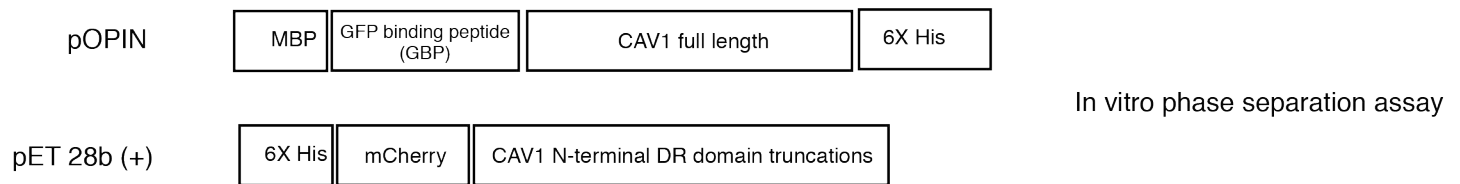

## Mouse Cavin1 mammalian expression constructs

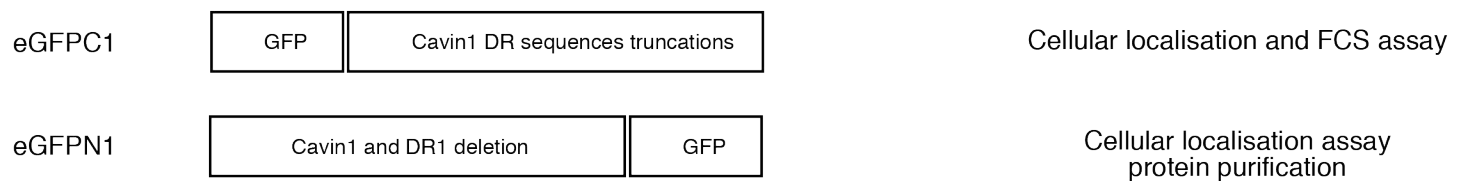

Figure S2. Schematic representation of protein expression constructs used in this study.

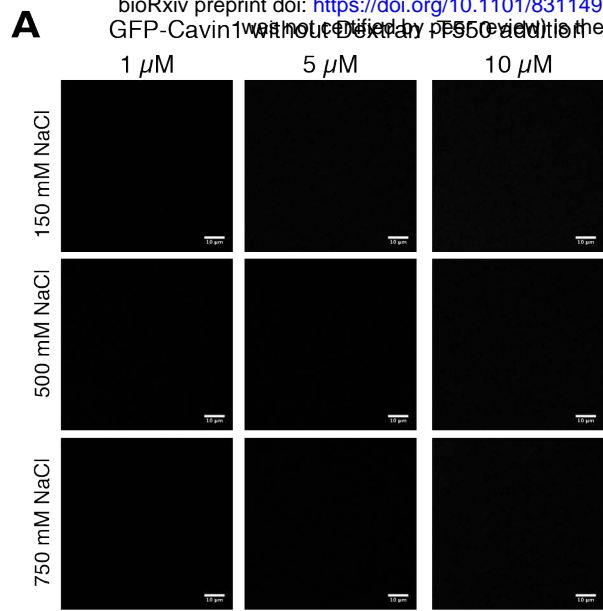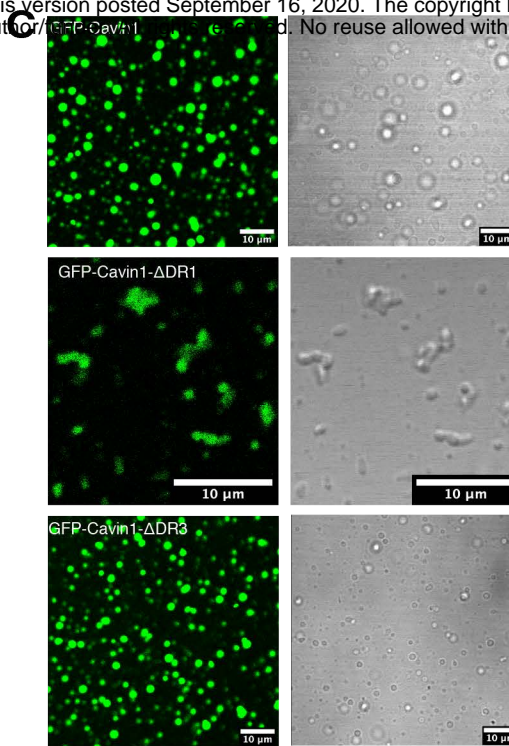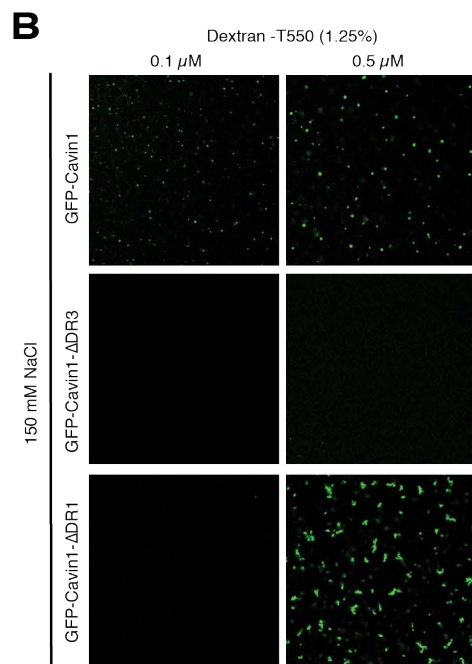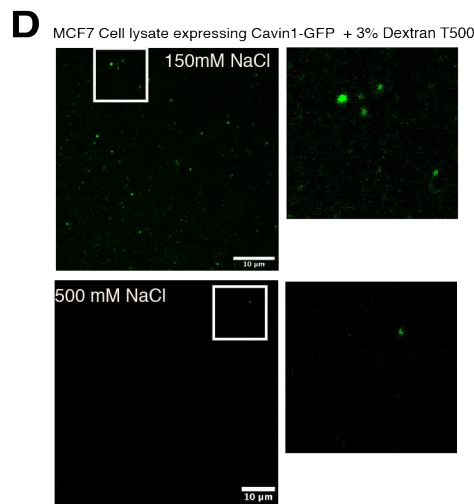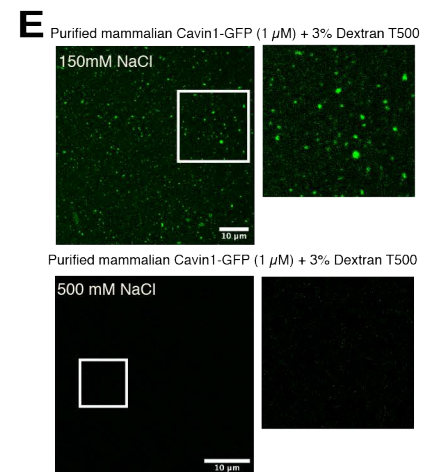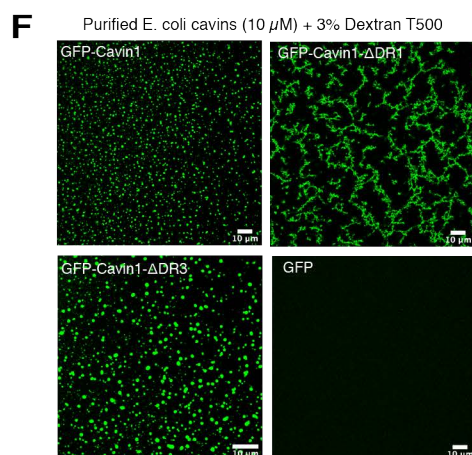

Figure S3. LLPS behaviour of Cavin1 expressed and purified from bacteria and mammalian cells (A) Liquid-liquid phase separation (LLPS) assay with bacterially expressed recombinant Ub- and GFP-tagged Cavin1, at different protein and salt concentrations but in the absence of dextran or other crowding agents. (B) At low concentrations, full length Cavin1 still forms liquid droplets, and Cavin1-ΔDR1 still forms coacervates. Cavin1-ΔDR3 is less prone to LLPS at low concentrations compared to the full-length protein. (C) LLPS assay performed with GFP tagged Cavin1-ΔDR1 by addition of 1.25% dextran T-500. Fluorescent GFP signal and adjacent bright field image showing transparent drops unlike non-specific precipitates that are usually non-transparent and milky or brown in appearance. Scale bar – 10  $\mu\text{m}$ . (D) LLPS assay performed with Cavin1-GFP expressed and purified from mammalian HEK293 cells. (E) MCF7 cell lysates expressing Cavin1-GFP with the addition of 3% dextran T-500 in either 150 mM NaCl or 500 mM NaCl. Scale bar – 10  $\mu\text{m}$ . (F) LLPS assay performed with purified *E. coli* cavins and GFP at higher dextran T-500 concentration (3%).

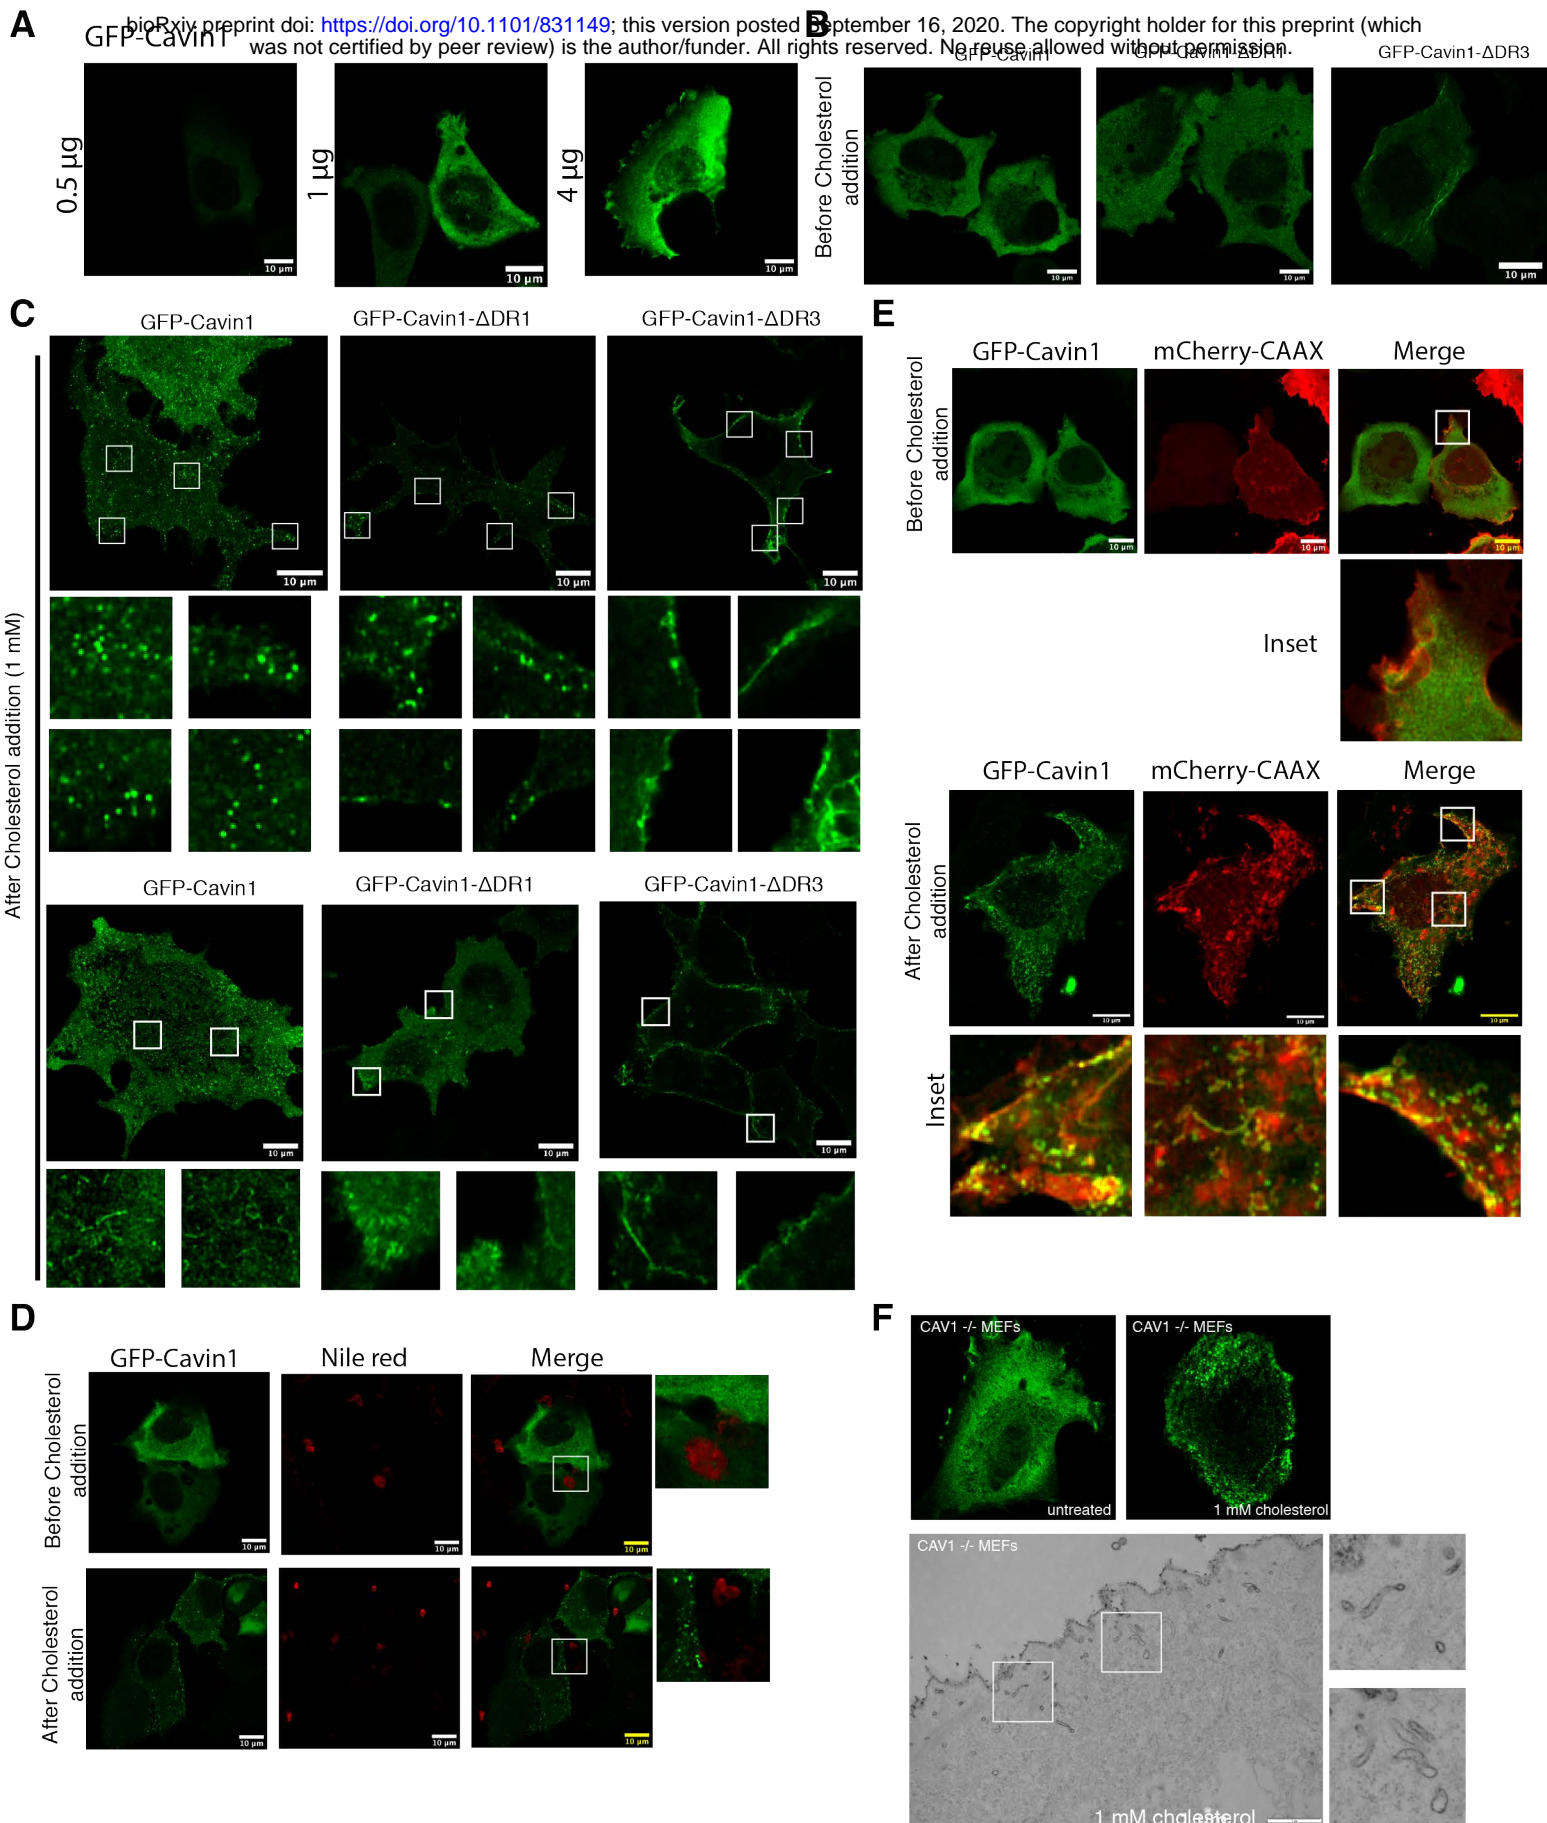

Figure S4. Cavin1 undergoes LLPS and remodels cellular membranes devoid of CAV1.

(A) MCF7 cells expressing GFP-Cavin1 at varying amount of DNA showing cytosolic distribution. (B) MCF7 cells expressing GFP-Cavin1, Cavin1- $\Delta$ DR1 showing cytosolic distribution and Cavin1- $\Delta$ DR3 showing diffuse localisation (upper panel). (C) Addition of a water-soluble form of cholesterol (1 mM added, with effective available cholesterol concentration  $\sim$ 40  $\mu$ M) to cells expressing GFP-Cavin1, Cavin1- $\Delta$ DR1 and Cavin1- $\Delta$ DR3 promotes liquid like droplet formation, membrane recruitment (upper panel) in some cells and tubulation in some cells for GFP-Cavin1 (lower panels). Scale bar – 10  $\mu$ m. (D) MCF7 cells expressing GFP-Cavin1 with cholesterol addition formed GFP-Cavin1 condensates that did not stain with Nile red suggesting these structures are not lipid droplets. (E) GFP-Cavin1 and mCherry-CAAX co-expression in MCF7 cells before cholesterol addition (upper panel) and after addition of cholesterol (lower panel) showing membrane patches and tubules partially co-localising with mCherry-CAAX. (F) CAV1<sup>-/-</sup> MEF cells expressing GFP-Cavin1 show cytosolic distribution and addition of 1 mM cholesterol causes membrane recruitment of GFP-Cavin1 (left panels) also observed by ruthenium red labelling of membrane surface by EM. Scale bar – 1  $\mu$ m.

**A**

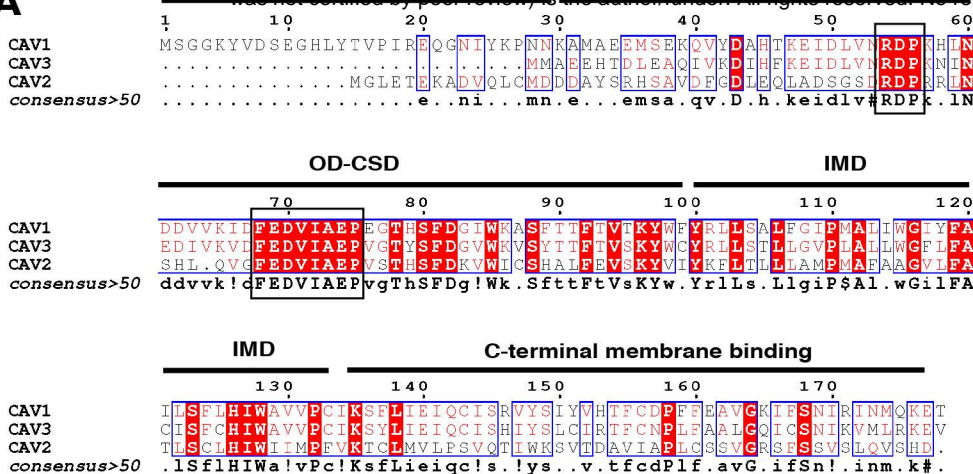

**B**

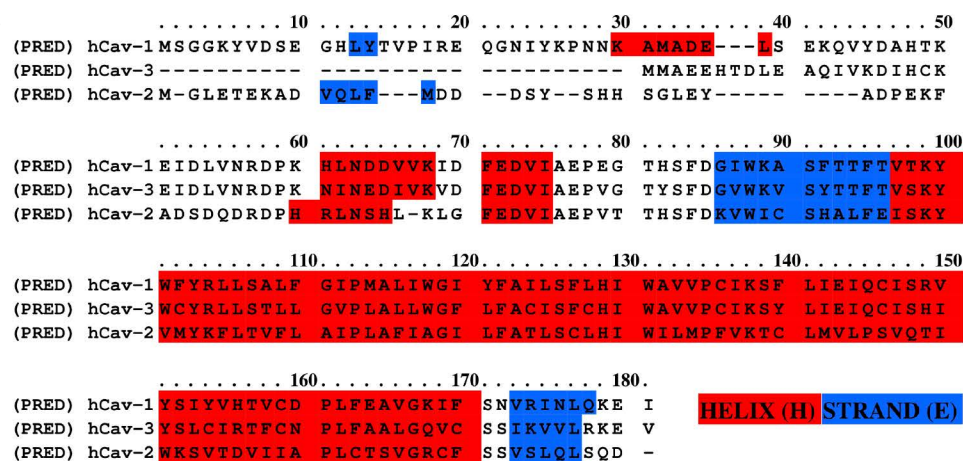

**C**

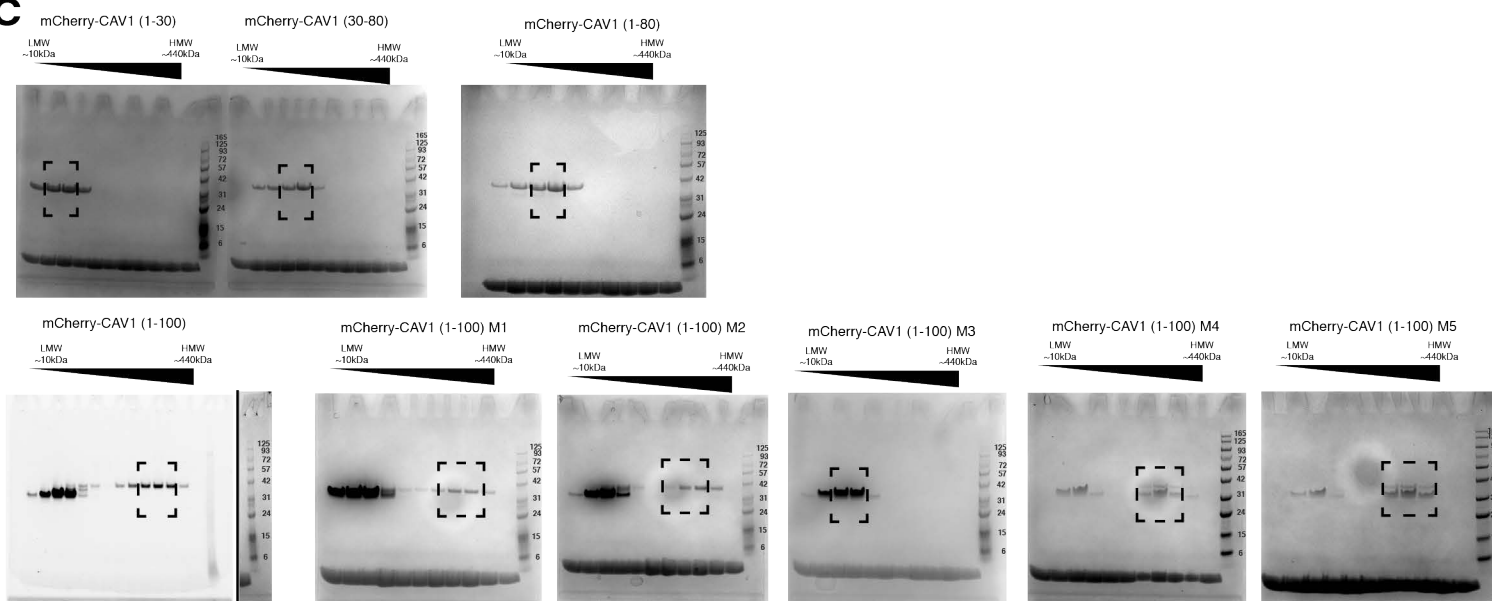

**D**

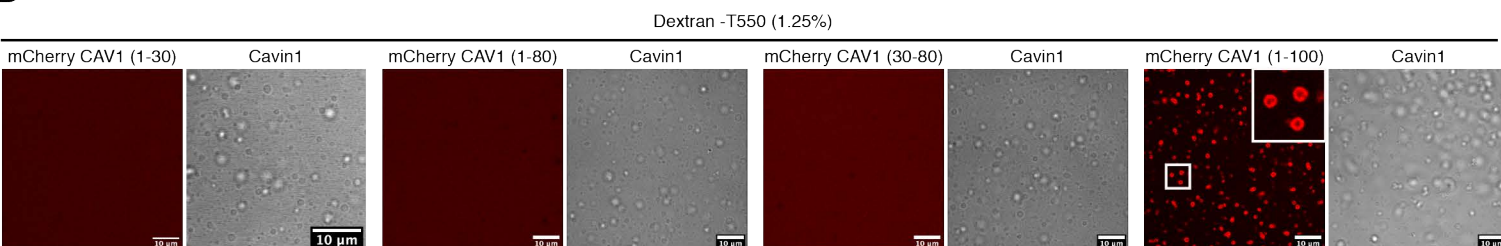

Figure S5. Co-phase separation of CAV1 with Cavin1.

(A) Amino acid sequence alignment of dog caveolin sequences showing non-conserved and conserved fragments of N-terminal DR region, oligomerization and scaffolding domain (OD-CSD), intramembrane domain (IMD) and C-terminal membrane binding domain. (B) Alignment of human CAV1, CAV2 and CAV3 with secondary structure predictions performed using the Praline webserver (<http://www.ibi.vu.nl/programs/pralinewww>) 92. (C) In gel fluorescence images of gel filtration fractions for respective mCherry-tagged CAV1 mutants. (D) LLPS assay with mCherry-CAV1 (1-30), (30-80), (1-80) and (1-100) and Cavin1. mCherry-CAV1 (1-100) is recruited to cavin1 droplets and undergo LLPS.

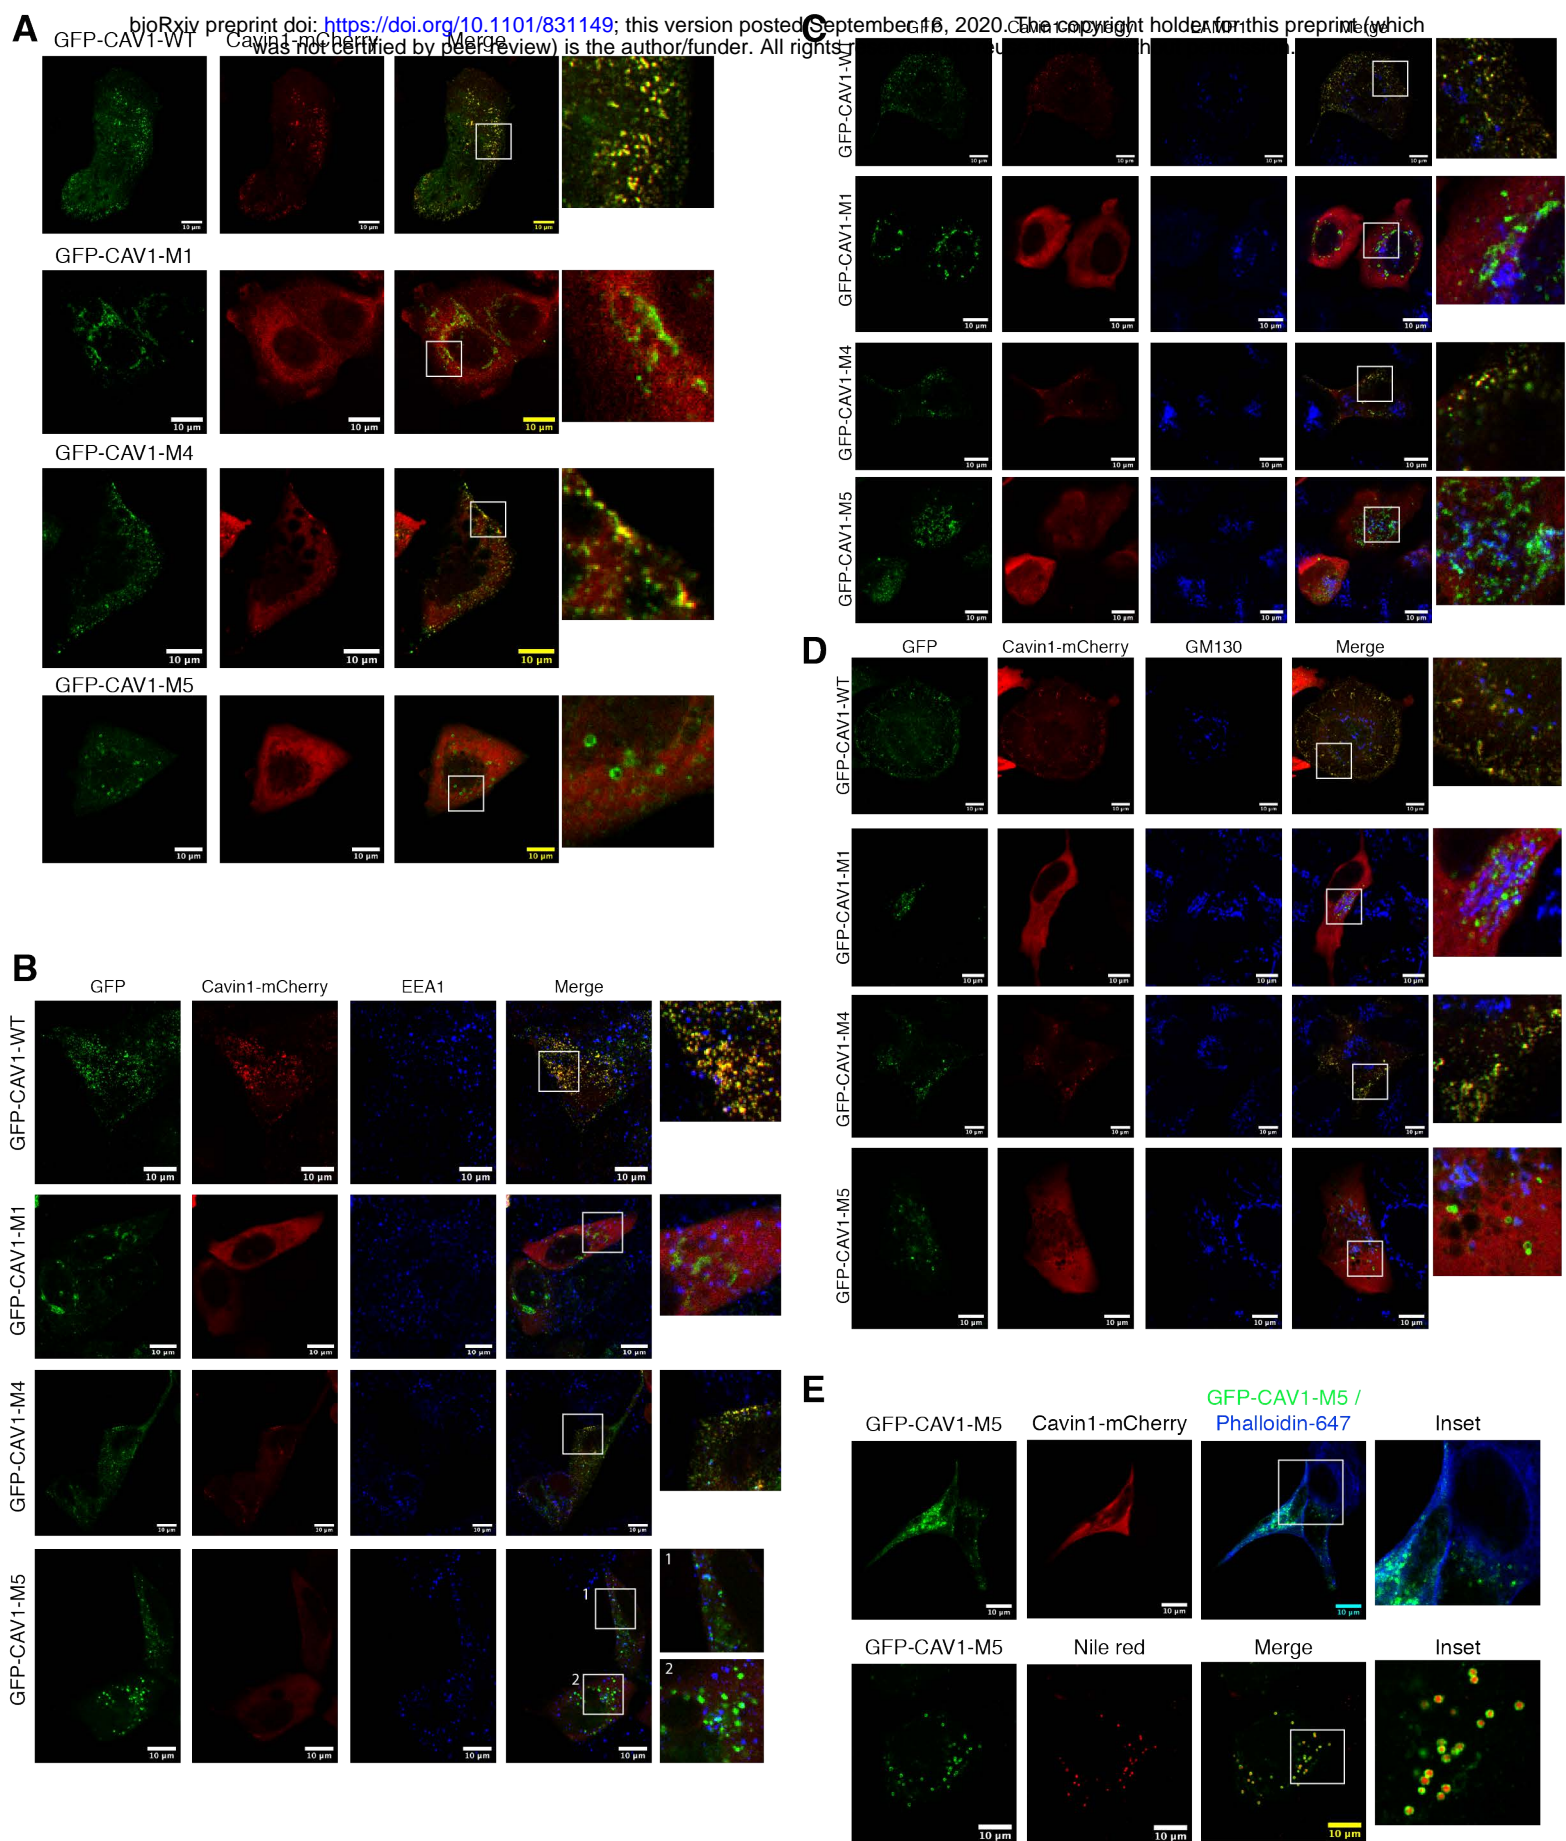

Figure S6. Analysis of GFP-CAV1 mutants co-expressing Cavin1-mCherry in MCF7 cells. GFP tagged CAV1 mutants (green) (Fig. 3) were co-expressed with Cavin1-mCherry in MCF7 cell line (A) and fixed cells were immunolabelled for early endosomes (EEA1) (B), lysosomes (LAMP1) (C), golgi membrane (GM130) (D), cellular actin (phalloidin) and Nile red (lipid droplets) (E) Scale bar – 10 μm



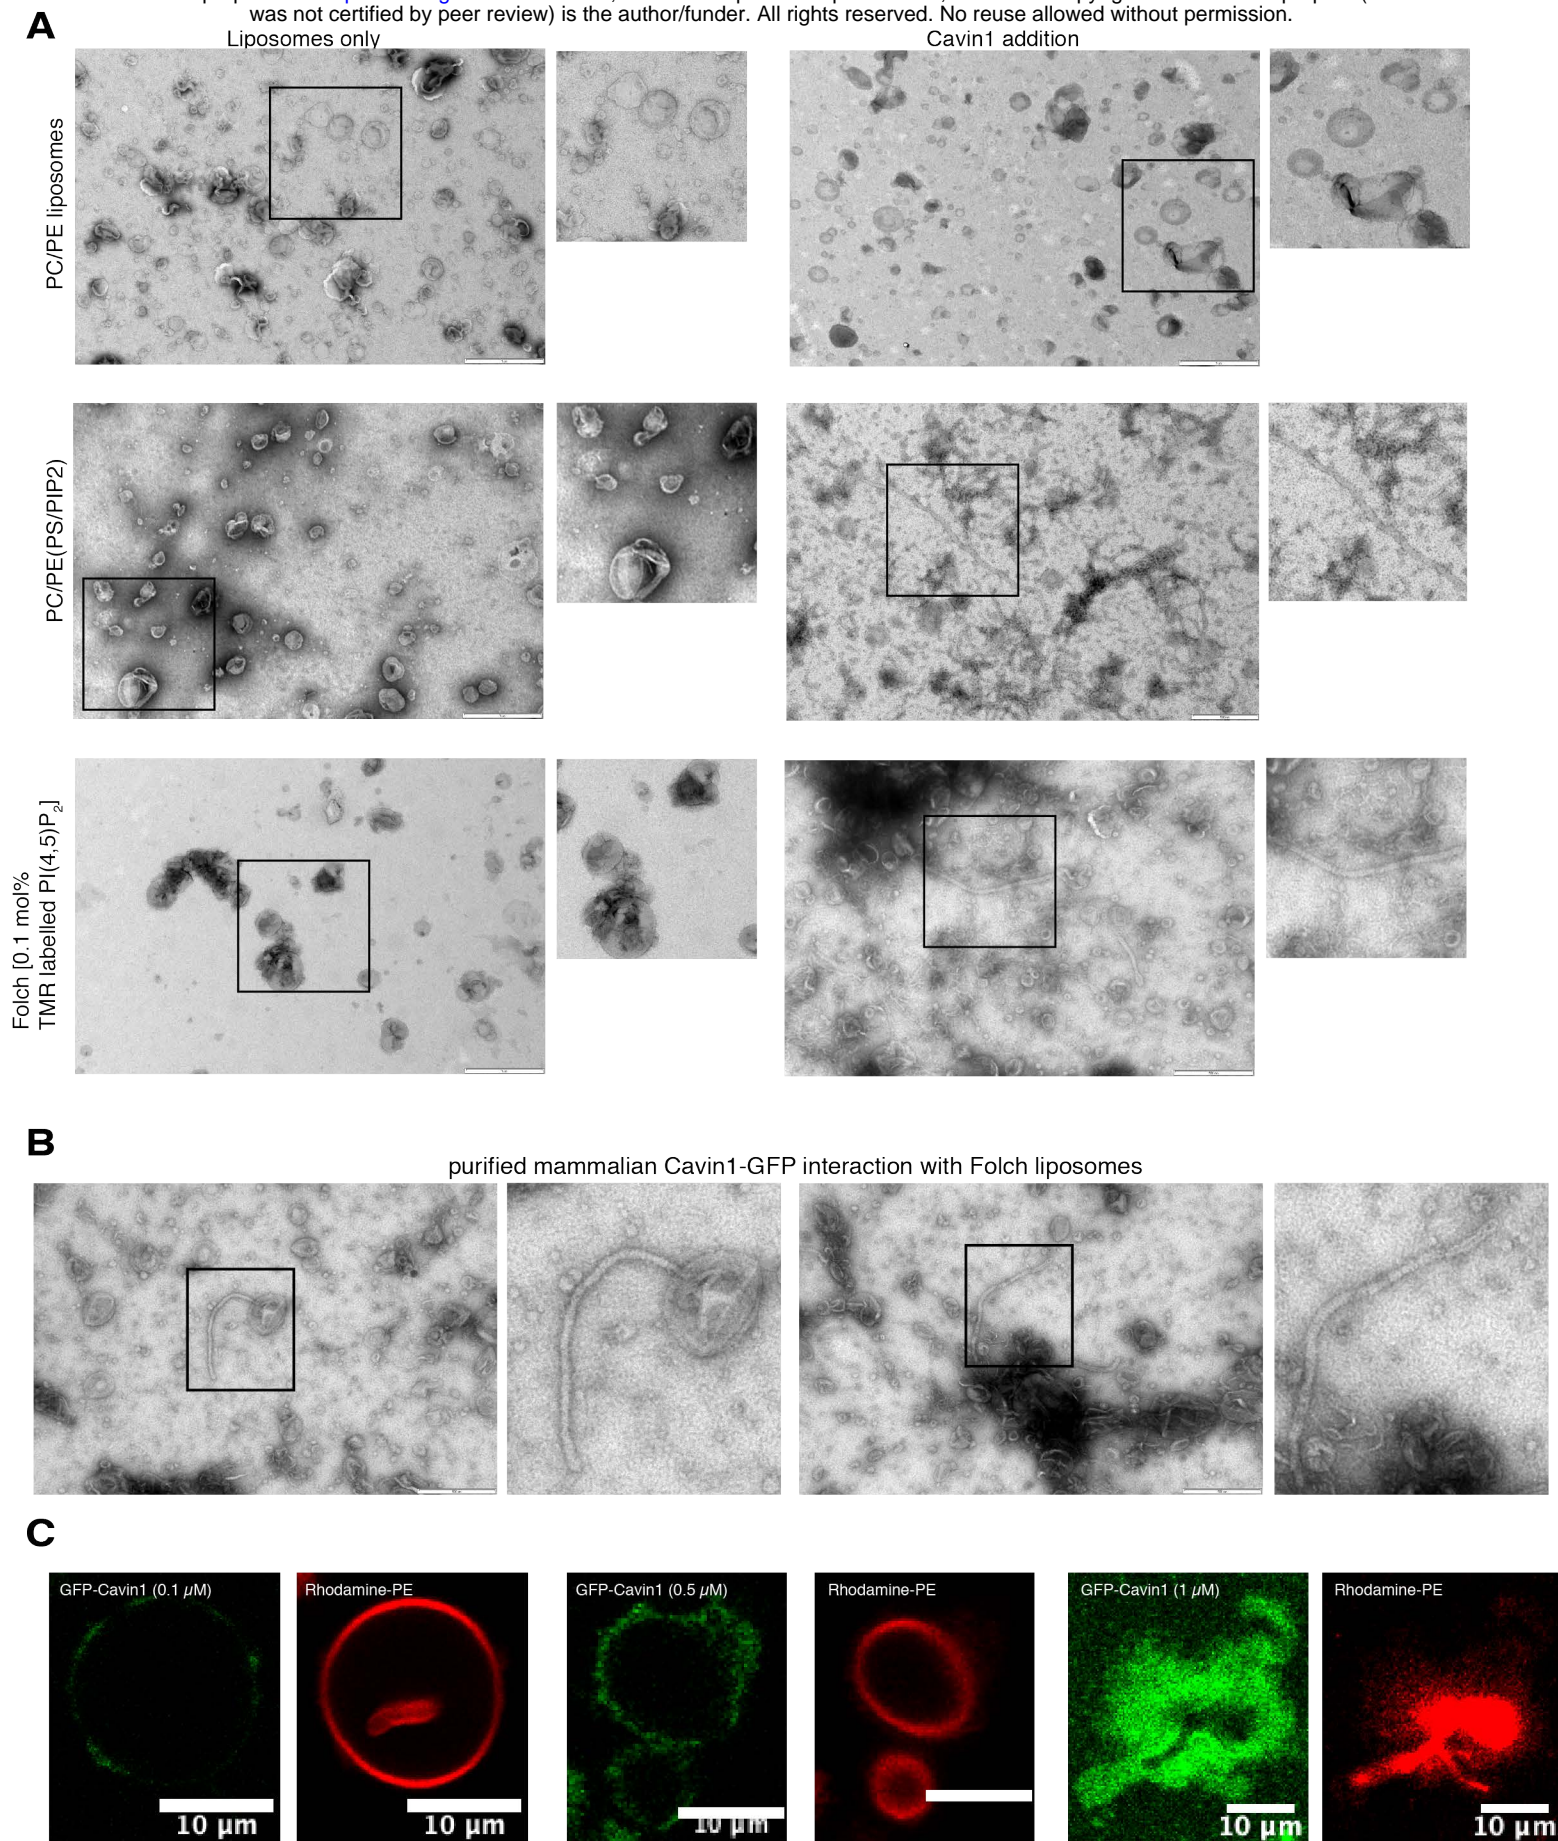

Figure S7. Cavin1 membrane interactions in vitro

(A) In vitro membrane tubulation assay and negative stain electron microscopy was performed after mixing Cavin1 and liposomes consisting of Phosphatidylcholine (PC) and Phosphatidylethanolamine (PE) or PC/PE liposomes containing PI(4,5)P<sub>2</sub> and Phosphatidylserine (PS) or Folch liposomes containing 0.1 mol% TMR labelled PI(4,5)P<sub>2</sub> to replicate conditions in Figure 5. (B) In vitro membrane tubulation assay performed by mixing mammalian Cavin1-GFP with Folch liposomes, with membrane tubules highlighted in insets. Scale bar – 1 μm. (C) Dose dependent GFP-Cavin1 interaction with GMVs containing rhodamine-PE.

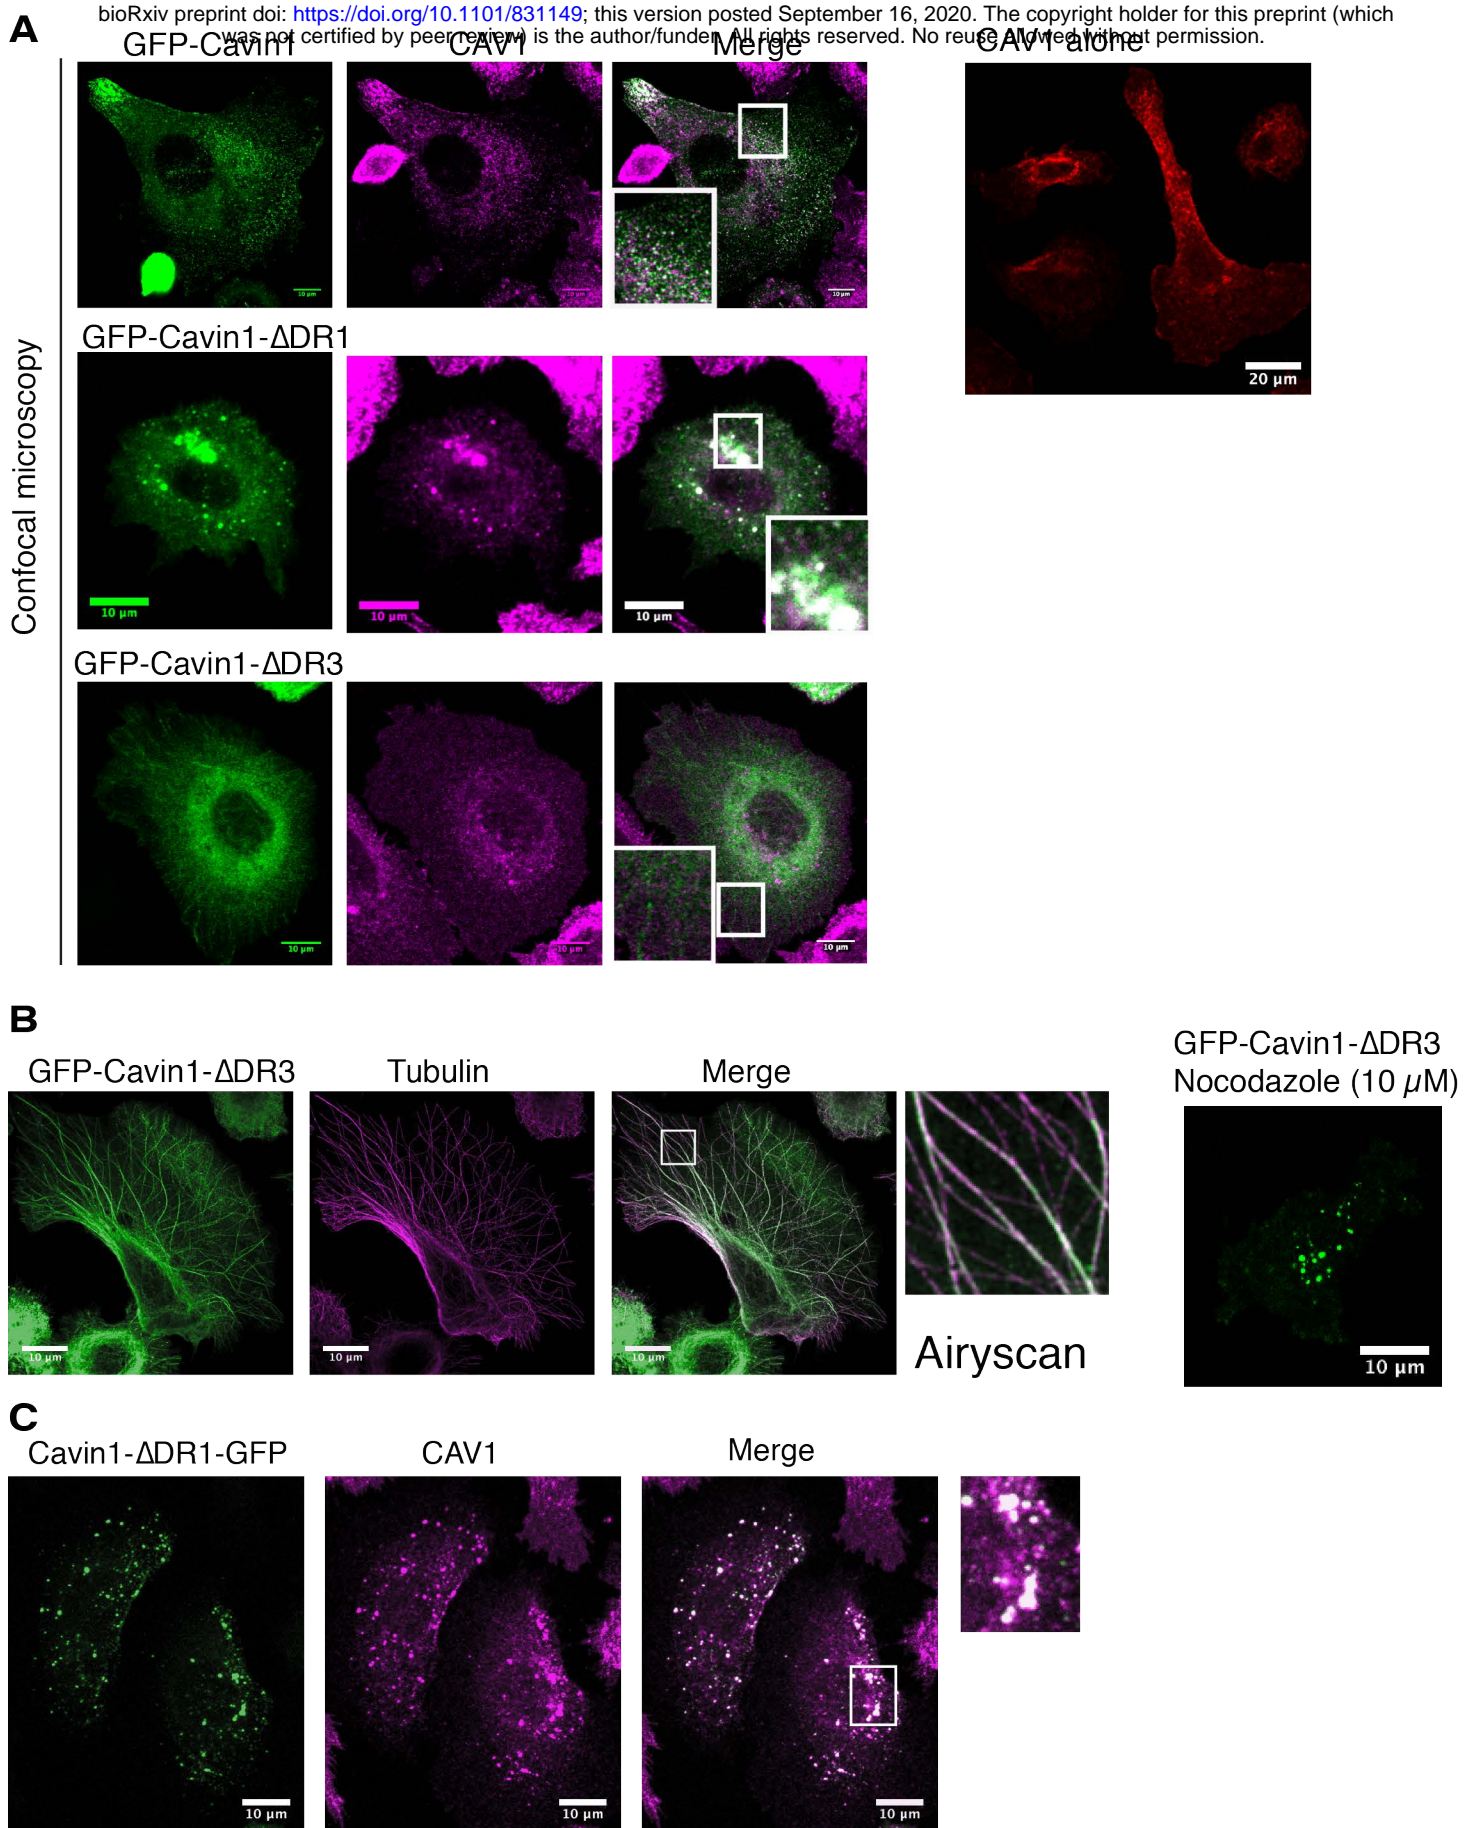

Figure S8. Localisation of Cavin1 with truncated DR1 and DR3 domains.

(A) Confocal microscopy images of GFP-Cavin1, GFP-Cavin1- $\Delta$ DR1 and GFP-Cavin1- $\Delta$ DR3 immunolabelled with CAV1 (red) (B) GFP-Cavin1- $\Delta$ DR3 (green) associates with microtubules (red) in PC3 cells and disperses to the cytosol and forms liquid droplets after nocodazole treatment. Fluorescence images acquired with a Zeiss Airyscan2 microscope. (C) Cavin1- $\Delta$ DR1-GFP with a C-terminal GFP tag shows a similar intracellular accumulation with CAV1 in PC3 cells as the N-terminal GFP-tagged protein (Fig. 6A), suggesting that the GFP tag does not contribute to this phenotype.

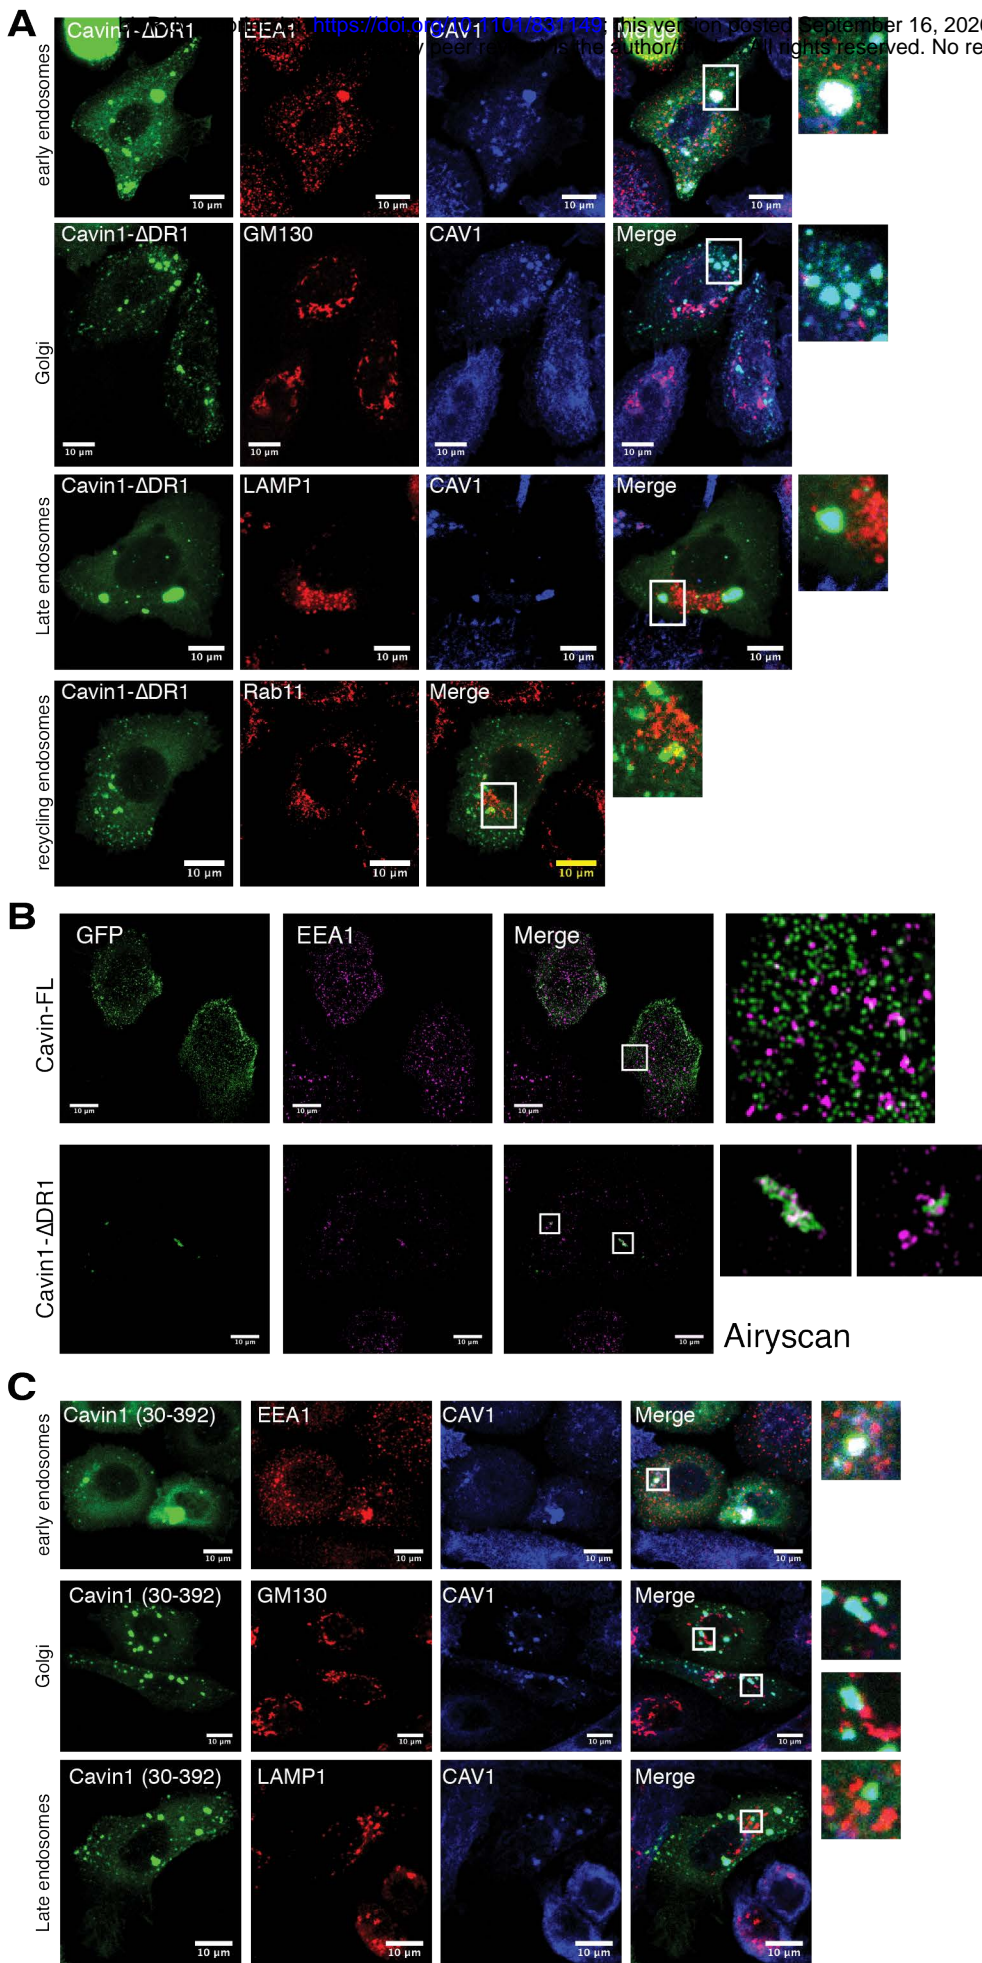

Figure S9. Comparison of Cavin1 truncation mutants with endocytic markers.

(A) GFP-tagged Cavin1- $\Delta$ DR1 (green) was expressed in PC3 cells, and fixed cells were immunolabelled for CAV1 (blue) and different endocytic markers (red) including EEA1, GM130, LAMP1 and Rab11. Only EEA1 showed significant overlap with the internalised Cavin1- $\Delta$ DR1 and CAV1 positive structures. (B) High-resolution images of GFP-tagged Cavin1 and Cavin1- $\Delta$ DR1 (green) in PC3 cells compared with EEA1 (magenta) acquired with a Zeiss Airyscan2 microscope. (C) As for (A) but cells expressing GFP-tagged Cavin1(30-392). Cavin1(30-392) accumulates at intracellular structures with CAV1 and positive for EEA1 labelling similarly to Cavin1- $\Delta$ DR1 with the full deletion of the DR1 domain.

Cavin1- $\Delta$ DR1

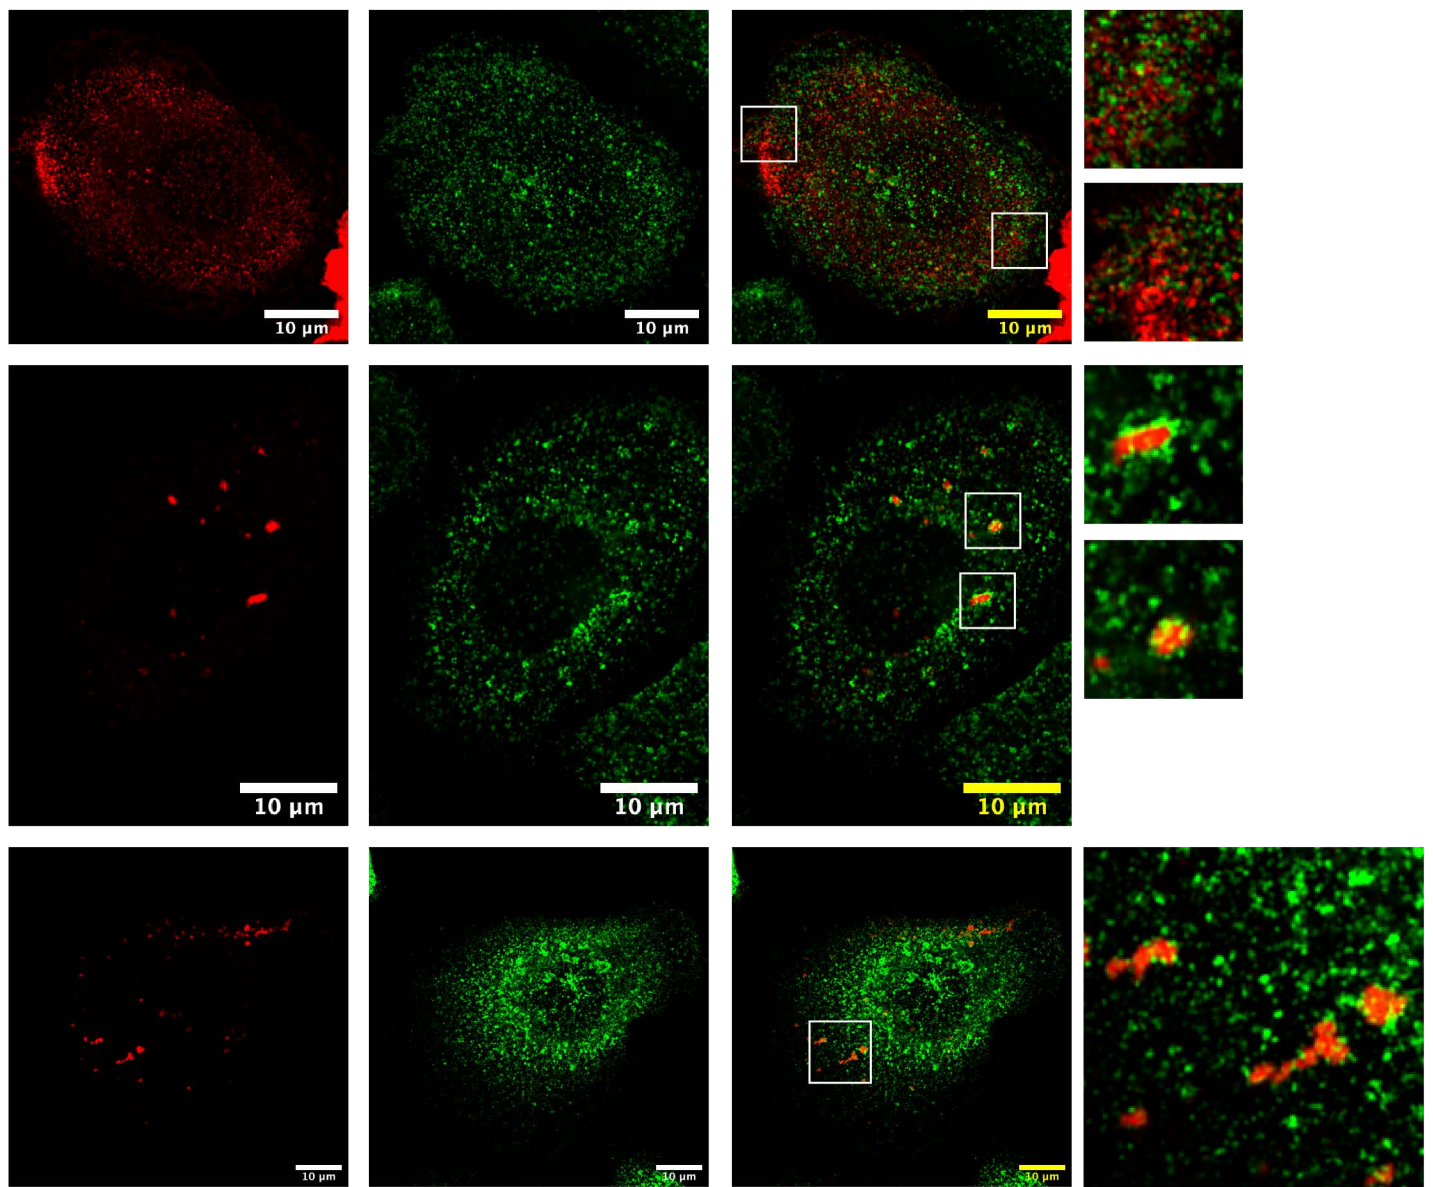

Figure S10. Cavin1- $\Delta$ DR1 shows colocalisation with internalised transferrin.

Transferrin uptake assay was performed in PC3 cells expressing either mCherry-tagged Cavin1 or Cavin1- $\Delta$ DR1 (red) with transferrin Alexa-488 (green). Wild-type mCherry-Cavin1 showed no colocalization with endocytosed transferrin whereas mCherry-Cavin1- $\Delta$ DR1 formed large structures (red) with transferrin positive endosomes surrounding them.

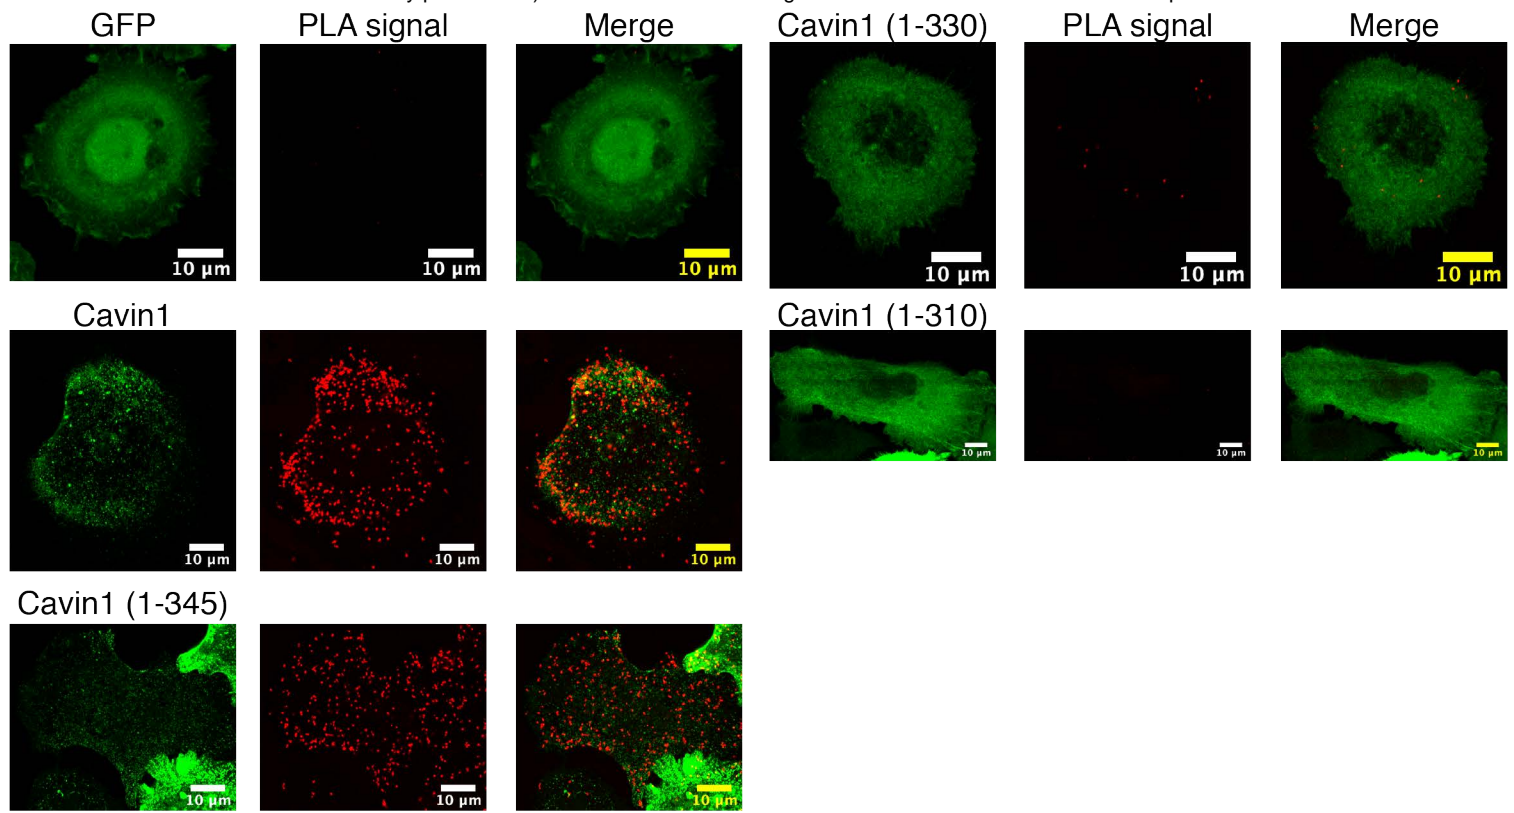

Figure S11. PLA assay of Cavin1 interactions with CAV1  
Representative images of proximity ligation assays of Cavin1 and CAV1 interactions, with GFP-tagged Cavin1 mutants in green and PLA signal in red . Scale bar – 10 µm. Related to Fig. 7C.

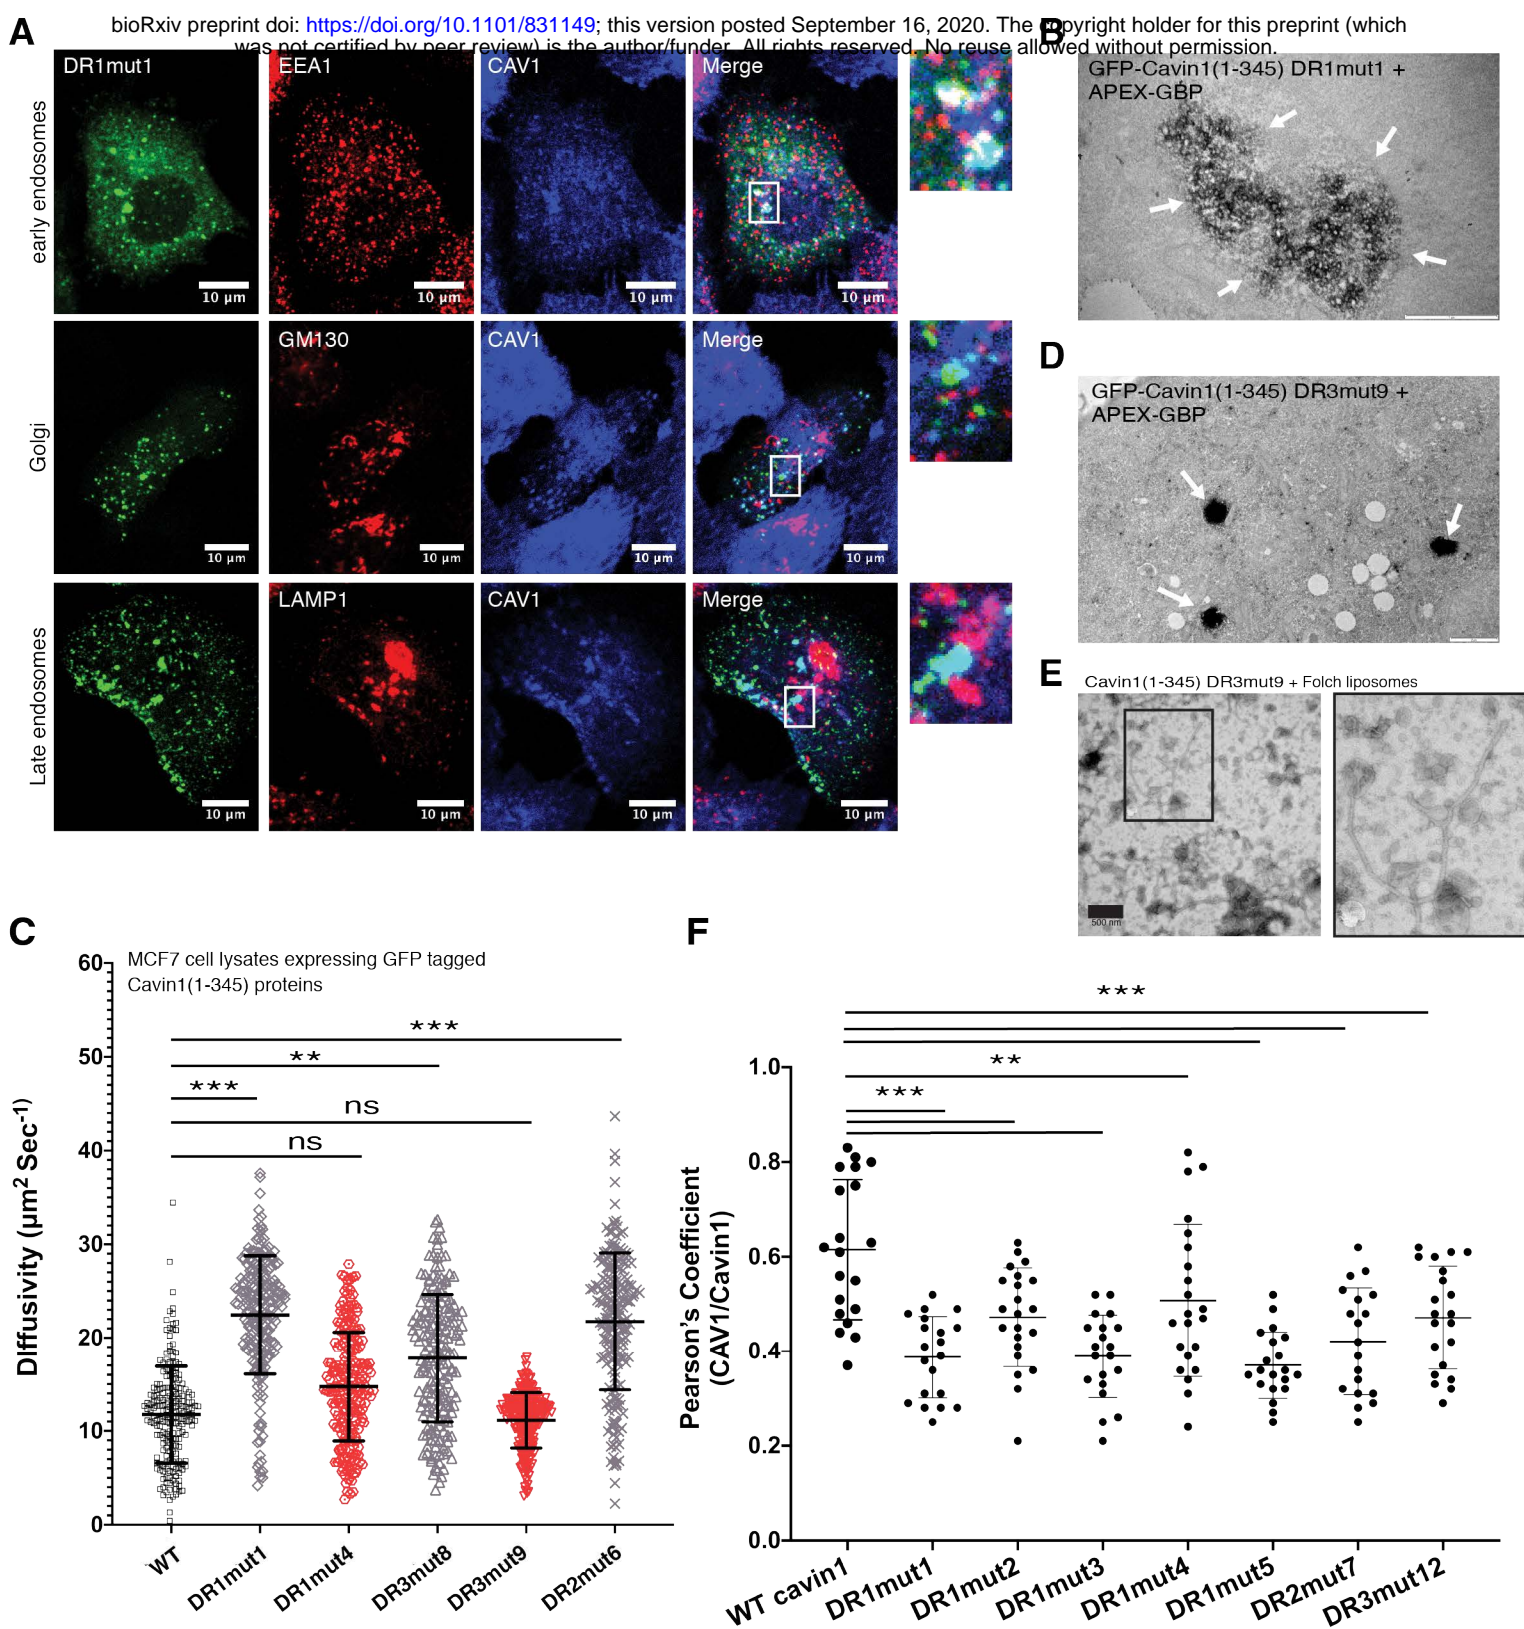

Figure S12. Localisation and membrane remodelling by Cav1(1-345) mutant proteins.

(A) GFP-tagged Cav1(1-345) mutant M1 was expressed in PC3 cells, and fixed cells were immunolabelled for CAV1 (blue) and different endocytic markers (red) including EEA1, GM130, and LAMP1. Like the complete deletion of the residues 1-30 in the Cav1 DR1 region (Fig. S7C) Cav1(1-345) mutant M1 shows significant overlap with CAV1 and EEA1 positive internal structures. (B) APEX-GBP labelling of GFP-tagged Cav1(1-345) mutant M1 shows accumulation and clustering with internal membrane vesicles (arrows). (C) The diffusion rate measured by FCS of selected GFP-tagged Cav1(1-345) DR mutants in lysates after expression in MCF7 cells (lacking endogenous Cavins and Caveolins).  $N = 3$ ,  $n = 15-25$ . Error bars indicate mean  $\pm$  SD,  $**P < 0.05$ ,  $*** P < 0.001$ , ns – not significant. (D) APEX-GBP labelling of GFP-tagged Cav1(1-345) mutant M4 shows droplet localisation (arrows). (E) Purified Ub-tagged Cav1(1-345) mutant M4 was mixed with unilamellar Folch liposomes (extruded to 400 nm diameter) and analysed by negative stain EM (1% uranyl acetate). This mutant is able to remodel and tubulate these synthetic membranes, although with a slightly larger diameter than wild-type Cav1 or Cav1(1-345) (Fig. 4D). (F) GFP-Cav1 and various DR mutants of Cav1 (1-345) were expressed in PC3 cell line and immunolabelled for CAV1 after fixation. The co-localization of GFP tagged cavin variants and CAV1 was quantified by Pearson's correlation coefficient.  $N = 2$ ,  $n = 8-12$ . Error bars indicate mean  $\pm$  SD.  $**P < 0.05$ ,  $*** P < 0.001$ .

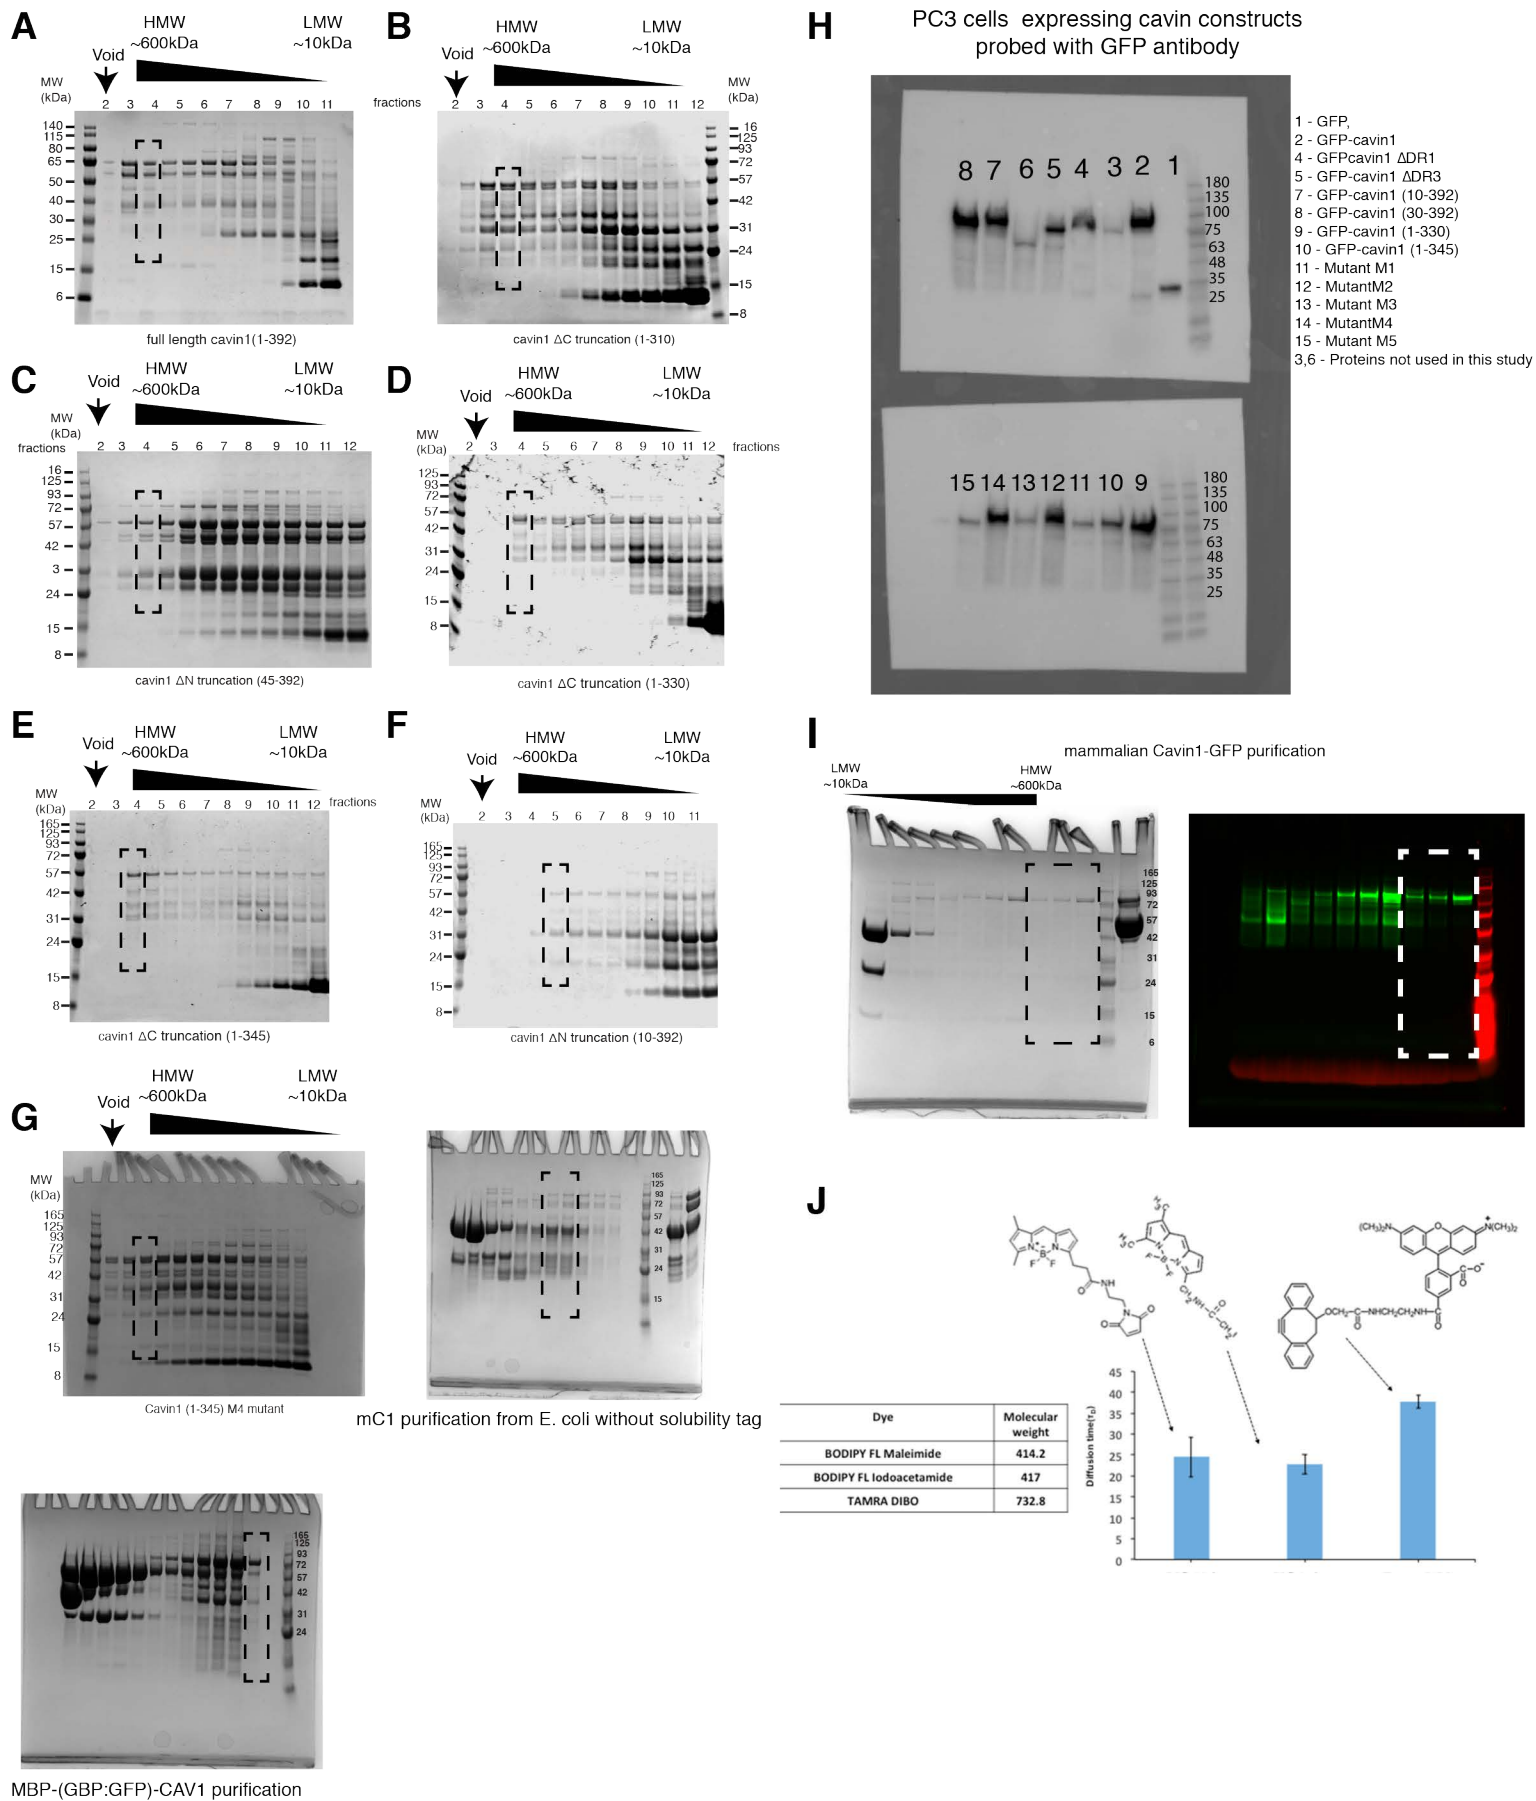

Figure S13. (A to G) Gels showing purified recombinant Cavin1 proteins used in this study. (H) Western blot showing expression of GFP tagged mutants expressed in PC3 cell line probed with anti-GFP antibody. (I) SDS-PAGE and in gel fluorescence profile of Cavin1-GFP purified from HEK cells using GFP nanobody and subjected size exclusion chromatography on superose 6 (10/300) column. (J) The diffusion time measurements for three dyes performed before each FCS session.
